# Supplementary material for: Genetic and Phenotypic Diversity in Breast Tumor Metastases
Source: Oxford University Press journal article supplement (doi:10.1158/0008-5472.can-13-2357-t), 2014-01-21
Supplement: 00085472can132357t-sup-tab2.xlsx [file 00085472can132357t-sup-tab2.xlsx]

## Sheet: Suppementary Table S2
Supplementary Table S2. BAC and CEP counts for each cell phenotype in the paired metastatic tumor (left) and paired primary and lymph node metastasis (right) series. The ratio BAC/CEP is shown for those cells presenting both loci.
Subtype	Code	Metastasis	probeforFISH	Phenotype	BAC	CEP	ratio		Subtype	Code	probeforFISH	Phenotype	Bac	Cep	Ratio
Her2	T1A	Lung	NUAK2(1q)	CD44+CD24-	3	3	1		TNBC	TNBC1_PR	H2AFJ(12p)	CD44-CD24+	2	2	1
Her2	T1A	Lung	NUAK2(1q)	CD44+CD24-	4	5	0.8		TNBC	TNBC1_PR	H2AFJ(12p)	CD44-CD24+	1	1	1
Her2	T1A	Lung	NUAK2(1q)	CD44+CD24-	3	5	0.6		TNBC	TNBC1_PR	H2AFJ(12p)	CD44-CD24+	2	2	1
Her2	T1A	Lung	NUAK2(1q)	CD44+CD24-	8	2	4		TNBC	TNBC1_PR	H2AFJ(12p)	CD44-CD24+	1	1	1
Her2	T1A	Lung	NUAK2(1q)	CD44+CD24-	8	2	4		TNBC	TNBC1_PR	H2AFJ(12p)	CD44-CD24+	2	2	1
Her2	T1A	Lung	NUAK2(1q)	CD44+CD24-	7	4	1.75		TNBC	TNBC1_PR	H2AFJ(12p)	CD44-CD24+	2	1	2
Her2	T1A	Lung	NUAK2(1q)	CD44+CD24-	10	9	1.11111		TNBC	TNBC1_PR	H2AFJ(12p)	CD44-CD24+	1	1	1
Her2	T1A	Lung	NUAK2(1q)	CD44+CD24-	3	3	1		TNBC	TNBC1_PR	H2AFJ(12p)	CD44-CD24+	2	2	1
Her2	T1A	Lung	NUAK2(1q)	CD44+CD24-	3	4	0.75		TNBC	TNBC1_PR	H2AFJ(12p)	CD44-CD24+	2	2	1
Her2	T1A	Lung	NUAK2(1q)	CD44+CD24-	1	1	1		TNBC	TNBC1_PR	H2AFJ(12p)	CD44-CD24+	1	1	1
Her2	T1A	Lung	NUAK2(1q)	CD44+CD24-	1	1	1		TNBC	TNBC1_PR	H2AFJ(12p)	CD44-CD24+	1	1	1
Her2	T1A	Lung	NUAK2(1q)	CD44+CD24-	3	4	0.75		TNBC	TNBC1_PR	H2AFJ(12p)	CD44-CD24+	3	2	1.5
Her2	T1A	Lung	NUAK2(1q)	CD44+CD24-	6	4	1.5		TNBC	TNBC1_PR	H2AFJ(12p)	CD44-CD24+	1	2	0.5
Her2	T1A	Lung	NUAK2(1q)	CD44+CD24-	3	2	1.5		TNBC	TNBC1_PR	H2AFJ(12p)	CD44-CD24+	4	4	1
Her2	T1A	Lung	NUAK2(1q)	CD44+CD24-	5	5	1		TNBC	TNBC1_PR	H2AFJ(12p)	CD44-CD24+	3	1	3
Her2	T1A	Lung	NUAK2(1q)	CD44+CD24-	5	4	1.25		TNBC	TNBC1_PR	H2AFJ(12p)	CD44-CD24+	2	2	1
Her2	T1A	Lung	NUAK2(1q)	CD44+CD24-	5	3	1.66667		TNBC	TNBC1_PR	H2AFJ(12p)	CD44-CD24+	1	1	1
Her2	T1A	Lung	NUAK2(1q)	CD44+CD24-	5	3	1.66667		TNBC	TNBC1_PR	H2AFJ(12p)	CD44-CD24+	3	1	3
Her2	T1A	Lung	NUAK2(1q)	CD44+CD24-	4	5	0.8		TNBC	TNBC1_PR	H2AFJ(12p)	CD44-CD24+	1	2	0.5
Her2	T1A	Lung	NUAK2(1q)	CD44+CD24-	5	5	1		TNBC	TNBC1_PR	H2AFJ(12p)	CD44-CD24+	3	2	1.5
Her2	T1A	Lung	NUAK2(1q)	CD44+CD24-	2	1	2		TNBC	TNBC1_PR	H2AFJ(12p)	CD44-CD24+	1	1	1
Her2	T1A	Lung	NUAK2(1q)	CD44+CD24-	2	2	1		TNBC	TNBC1_PR	H2AFJ(12p)	CD44-CD24+	2	2	1
Her2	T1A	Lung	NUAK2(1q)	CD44+CD24-	6	4	1.5		TNBC	TNBC1_PR	H2AFJ(12p)	CD44-CD24+	2	2	1
Her2	T1A	Lung	NUAK2(1q)	CD44+CD24-	5	4	1.25		TNBC	TNBC1_PR	H2AFJ(12p)	CD44-CD24+	1	1	1
Her2	T1A	Lung	NUAK2(1q)	CD44+CD24-	3	4	0.75		TNBC	TNBC1_PR	H2AFJ(12p)	CD44-CD24+	2	2	1
Her2	T1A	Lung	NUAK2(1q)	CD44+CD24-	4	2	2		TNBC	TNBC1_PR	H2AFJ(12p)	CD44-CD24+	1	2	0.5
Her2	T1A	Lung	NUAK2(1q)	CD44+CD24-	9	9	1		TNBC	TNBC1_PR	H2AFJ(12p)	CD44-CD24+	2	3	0.666667
Her2	T1A	Lung	NUAK2(1q)	CD44+CD24-	2	2	1		TNBC	TNBC1_PR	H2AFJ(12p)	CD44-CD24+	1	1	1
Her2	T1A	Lung	NUAK2(1q)	CD44+CD24-	5	3	1.66667		TNBC	TNBC1_PR	H2AFJ(12p)	CD44-CD24+	1	1	1
Her2	T1A	Lung	NUAK2(1q)	CD44+CD24-	5	5	1		TNBC	TNBC1_PR	H2AFJ(12p)	CD44-CD24+	2	2	1
Her2	T1A	Lung	NUAK2(1q)	CD44+CD24-	5	6	0.833333		TNBC	TNBC1_PR	H2AFJ(12p)	CD44-CD24+	3	2	1.5
Her2	T1A	Lung	NUAK2(1q)	CD44+CD24-	4	4	1		TNBC	TNBC1_PR	H2AFJ(12p)	CD44-CD24+	3	2	1.5
Her2	T1A	Lung	NUAK2(1q)	CD44+CD24-	3	1	3		TNBC	TNBC1_PR	H2AFJ(12p)	CD44-CD24+	3	2	1.5
Her2	T1A	Lung	NUAK2(1q)	CD44+CD24-	4	6	0.666667		TNBC	TNBC1_PR	H2AFJ(12p)	CD44-CD24+	3	3	1
Her2	T1A	Lung	NUAK2(1q)	CD44+CD24-	3	2	1.5		TNBC	TNBC1_PR	H2AFJ(12p)	CD44-CD24+	2	2	1
Her2	T1A	Lung	NUAK2(1q)	CD44+CD24-	3	4	0.75		TNBC	TNBC1_PR	H2AFJ(12p)	CD44-CD24+	2	2	1
Her2	T1A	Lung	NUAK2(1q)	CD44+CD24-	3	3	1		TNBC	TNBC1_PR	H2AFJ(12p)	CD44-CD24+	1	1	1
Her2	T1A	Lung	NUAK2(1q)	CD44+CD24-	3	3	1		TNBC	TNBC1_PR	H2AFJ(12p)	CD44-CD24+	1	2	0.5
Her2	T1A	Lung	NUAK2(1q)	CD44+CD24-	6	6	1		TNBC	TNBC1_PR	H2AFJ(12p)	CD44-CD24+	1	1	1
Her2	T1A	Lung	NUAK2(1q)	CD44+CD24-	7	8	0.875		TNBC	TNBC1_PR	H2AFJ(12p)	CD44-CD24+	1	1	1
Her2	T1A	Lung	NUAK2(1q)	CD44+CD24-	4	3	1.33333		TNBC	TNBC1_PR	H2AFJ(12p)	CD44-CD24+	1	1	1
Her2	T1A	Lung	NUAK2(1q)	CD44+CD24-	3	2	1.5		TNBC	TNBC1_PR	H2AFJ(12p)	CD44-CD24+	2	1	2
Her2	T1A	Lung	NUAK2(1q)	CD44+CD24-	6	7	0.857143		TNBC	TNBC1_PR	H2AFJ(12p)	CD44-CD24+	1	1	1
Her2	T1A	Lung	NUAK2(1q)	CD44+CD24-	3	4	0.75		TNBC	TNBC1_PR	H2AFJ(12p)	CD44-CD24+	1	1	1
Her2	T1A	Lung	NUAK2(1q)	CD44+CD24-	5	5	1		TNBC	TNBC1_PR	H2AFJ(12p)	CD44-CD24+	2	3	0.666667
Her2	T1A	Lung	NUAK2(1q)	CD44+CD24-	2	2	1		TNBC	TNBC1_PR	H2AFJ(12p)	CD44-CD24+	1	1	1
Her2	T1A	Lung	NUAK2(1q)	CD44+CD24-	5	1	5		TNBC	TNBC1_PR	H2AFJ(12p)	CD44-CD24+	1	2	0.5
Her2	T1A	Lung	NUAK2(1q)	CD44+CD24-	5	4	1.25		TNBC	TNBC1_PR	H2AFJ(12p)	CD44-CD24+	2	1	2
Her2	T1A	Lung	NUAK2(1q)	CD44+CD24-	5	1	5		TNBC	TNBC1_PR	H2AFJ(12p)	CD44-CD24+	1	1	1
Her2	T1A	Lung	NUAK2(1q)	CD44+CD24-	10	9	1.11111		TNBC	TNBC1_PR	H2AFJ(12p)	CD44-CD24+	2	2	1
Her2	T1A	Lung	NUAK2(1q)	CD44+CD24-	0	1	0		TNBC	TNBC1_PR	H2AFJ(12p)	CD44-CD24+	1	1	1
Her2	T1A	Lung	NUAK2(1q)	CD44+CD24-	5	2	2.5		TNBC	TNBC1_PR	H2AFJ(12p)	CD44-CD24+	2	2	1
Her2	T1A	Lung	NUAK2(1q)	CD44+CD24-	6	3	2		TNBC	TNBC1_PR	H2AFJ(12p)	CD44-CD24+	2	2	1
Her2	T1A	Lung	NUAK2(1q)	CD44+CD24-	10	10	1		TNBC	TNBC1_PR	H2AFJ(12p)	CD44-CD24+	2	1	2
Her2	T1A	Lung	NUAK2(1q)	CD44+CD24-	3	3	1		TNBC	TNBC1_PR	H2AFJ(12p)	CD44-CD24+	1	1	1
Her2	T1A	Lung	NUAK2(1q)	CD44+CD24-	9	3	3		TNBC	TNBC1_PR	H2AFJ(12p)	CD44-CD24+	2	2	1
Her2	T1A	Lung	NUAK2(1q)	CD44+CD24-	2	2	1		TNBC	TNBC1_PR	H2AFJ(12p)	CD44-CD24+	2	1	2
Her2	T1A	Lung	NUAK2(1q)	CD44+CD24-	1	1	1		TNBC	TNBC1_PR	H2AFJ(12p)	CD44-CD24+	1	1	1
Her2	T1A	Lung	NUAK2(1q)	CD44+CD24-	1	1	1		TNBC	TNBC1_PR	H2AFJ(12p)	CD44-CD24+	1	1	1
Her2	T1A	Lung	NUAK2(1q)	CD44+CD24-	7	7	1		TNBC	TNBC1_PR	H2AFJ(12p)	CD44-CD24+	1	1	1
Her2	T1A	Lung	NUAK2(1q)	CD44+CD24-	4	2	2		TNBC	TNBC1_PR	H2AFJ(12p)	CD44-CD24+	1	1	1
Her2	T1A	Lung	NUAK2(1q)	CD44+CD24-	6	1	6		TNBC	TNBC1_PR	H2AFJ(12p)	CD44-CD24+	1	1	1
Her2	T1A	Lung	NUAK2(1q)	CD44+CD24-	6	2	3		TNBC	TNBC1_PR	H2AFJ(12p)	CD44-CD24+	1	1	1
Her2	T1A	Lung	NUAK2(1q)	CD44+CD24-	1	2	0.5		TNBC	TNBC1_PR	H2AFJ(12p)	CD44-CD24+	1	1	1
Her2	T1A	Lung	NUAK2(1q)	CD44+CD24-	4	4	1		TNBC	TNBC1_PR	H2AFJ(12p)	CD44-CD24+	1	2	0.5
Her2	T1A	Lung	NUAK2(1q)	CD44+CD24-	3	1	3		TNBC	TNBC1_PR	H2AFJ(12p)	CD44-CD24+	2	1	2
Her2	T1A	Lung	NUAK2(1q)	CD44+CD24-	1	1	1		TNBC	TNBC1_PR	H2AFJ(12p)	CD44-CD24+	2	2	1
Her2	T1A	Lung	NUAK2(1q)	CD44+CD24-	3	2	1.5		TNBC	TNBC1_PR	H2AFJ(12p)	CD44-CD24+	2	2	1
Her2	T1A	Lung	NUAK2(1q)	CD44+CD24-	5	3	1.66667		TNBC	TNBC1_PR	H2AFJ(12p)	CD44-CD24+	1	1	1
Her2	T1A	Lung	NUAK2(1q)	CD44+CD24-	3	2	1.5		TNBC	TNBC1_PR	H2AFJ(12p)	CD44-CD24+	2	2	1
Her2	T1A	Lung	NUAK2(1q)	CD44+CD24-	2	2	1		TNBC	TNBC1_PR	H2AFJ(12p)	CD44-CD24+	2	2	1
Her2	T1A	Lung	NUAK2(1q)	CD44+CD24-	4	2	2		TNBC	TNBC1_PR	H2AFJ(12p)	CD44-CD24+	1	1	1
Her2	T1A	Lung	NUAK2(1q)	CD44+CD24-	5	3	1.66667		TNBC	TNBC1_PR	H2AFJ(12p)	CD44-CD24+	1	2	0.5
Her2	T1A	Lung	NUAK2(1q)	CD44+CD24-	3	2	1.5		TNBC	TNBC1_PR	H2AFJ(12p)	CD44-CD24+	2	2	1
Her2	T1A	Lung	NUAK2(1q)	CD44+CD24-	3	1	3		TNBC	TNBC1_PR	H2AFJ(12p)	CD44-CD24+	1	1	1
Her2	T1A	Lung	NUAK2(1q)	CD44+CD24-	10	9	1.11111		TNBC	TNBC1_PR	H2AFJ(12p)	CD44-CD24+	2	2	1
Her2	T1A	Lung	NUAK2(1q)	CD44+CD24-	7	5	1.4		TNBC	TNBC1_PR	H2AFJ(12p)	CD44-CD24+	1	2	0.5
Her2	T1A	Lung	NUAK2(1q)	CD44+CD24-	4	1	4		TNBC	TNBC1_PR	H2AFJ(12p)	CD44-CD24+	3	2	1.5
Her2	T1A	Lung	NUAK2(1q)	CD44+CD24-	6	6	1		TNBC	TNBC1_PR	H2AFJ(12p)	CD44-CD24+	1	1	1
Her2	T1A	Lung	NUAK2(1q)	CD44+CD24-	2	1	2		TNBC	TNBC1_PR	H2AFJ(12p)	CD44-CD24+	2	1	2
Her2	T1A	Lung	NUAK2(1q)	CD44+CD24-	5	5	1		TNBC	TNBC1_PR	H2AFJ(12p)	CD44-CD24+	2	2	1
Her2	T1A	Lung	NUAK2(1q)	CD44+CD24-	10	5	2		TNBC	TNBC1_PR	H2AFJ(12p)	CD44-CD24+	1	2	0.5
Her2	T1A	Lung	NUAK2(1q)	CD44+CD24-	4	3	1.33333		TNBC	TNBC1_PR	H2AFJ(12p)	CD44-CD24+	1	1	1
Her2	T1A	Lung	NUAK2(1q)	CD44+CD24-	4	3	1.33333		TNBC	TNBC1_PR	H2AFJ(12p)	CD44-CD24+	2	1	2
Her2	T1A	Lung	NUAK2(1q)	CD44+CD24-	5	6	0.833333		TNBC	TNBC1_PR	H2AFJ(12p)	CD44-CD24+	2	1	2
Her2	T1A	Lung	NUAK2(1q)	CD44+CD24-	1	1	1		TNBC	TNBC1_PR	H2AFJ(12p)	CD44-CD24+	2	2	1
Her2	T1A	Lung	NUAK2(1q)	CD44+CD24-	4	2	2		TNBC	TNBC1_PR	H2AFJ(12p)	CD44-CD24+	2	2	1
Her2	T1A	Lung	NUAK2(1q)	CD44+CD24-	3	3	1		TNBC	TNBC1_PR	H2AFJ(12p)	CD44-CD24+	2	2	1
Her2	T1A	Lung	NUAK2(1q)	CD44+CD24-	4	2	2		TNBC	TNBC1_PR	H2AFJ(12p)	CD44-CD24+	1	1	1
Her2	T1A	Lung	NUAK2(1q)	CD44+CD24-	4	2	2		TNBC	TNBC1_PR	H2AFJ(12p)	CD44-CD24+	2	2	1
Her2	T1A	Lung	NUAK2(1q)	CD44+CD24-	2	1	2		TNBC	TNBC1_PR	H2AFJ(12p)	CD44-CD24+	1	1	1
Her2	T1A	Lung	NUAK2(1q)	CD44+CD24-	2	1	2		TNBC	TNBC1_PR	H2AFJ(12p)	CD44-CD24+	1	1	1
Her2	T1A	Lung	NUAK2(1q)	CD44+CD24-	4	2	2		TNBC	TNBC1_PR	H2AFJ(12p)	CD44-CD24+	2	2	1
Her2	T1A	Lung	NUAK2(1q)	CD44+CD24-	2	2	1		TNBC	TNBC1_PR	H2AFJ(12p)	CD44-CD24+	1	1	1
Her2	T1A	Lung	NUAK2(1q)	CD44+CD24-	3	2	1.5		TNBC	TNBC1_PR	H2AFJ(12p)	CD44-CD24+	1	1	1
Her2	T1A	Lung	NUAK2(1q)	CD44+CD24-	3	3	1		TNBC	TNBC1_PR	H2AFJ(12p)	CD44-CD24+	1	1	1
Her2	T1A	Lung	NUAK2(1q)	CD44+CD24-	5	4	1.25		TNBC	TNBC1_PR	H2AFJ(12p)	CD44-CD24+	1	1	1
Her2	T1A	Lung	NUAK2(1q)	CD44+CD24-	2	1	2		TNBC	TNBC1_PR	H2AFJ(12p)	CD44-CD24+	2	2	1
Her2	T1A	Lung	NUAK2(1q)	CD44+CD24-	2	1	2		TNBC	TNBC1_PR	H2AFJ(12p)	CD44-CD24+	1	1	1
Her2	T1A	Lung	NUAK2(1q)	CD44+CD24-	4	2	2		TNBC	TNBC1_PR	H2AFJ(12p)	CD44-CD24+	1	1	1
Her2	T1A	Lung	NUAK2(1q)	CD44+CD24+	4	3	1.33333		TNBC	TNBC1_PR	H2AFJ(12p)	CD44-CD24-	4	2	2
Her2	T1A	Lung	NUAK2(1q)	CD44+CD24+	5	4	1.25		TNBC	TNBC1_PR	H2AFJ(12p)	CD44-CD24-	2	2	1
Her2	T1A	Lung	NUAK2(1q)	CD44+CD24+	3	2	1.5		TNBC	TNBC1_PR	H2AFJ(12p)	CD44-CD24-	2	2	1
Her2	T1A	Lung	NUAK2(1q)	CD44+CD24+	6	3	2		TNBC	TNBC1_PR	H2AFJ(12p)	CD44-CD24-	1	1	1
Her2	T1A	Lung	NUAK2(1q)	CD44+CD24+	2	3	0.666667		TNBC	TNBC1_PR	H2AFJ(12p)	CD44-CD24-	1	1	1
Her2	T1A	Lung	NUAK2(1q)	CD44+CD24+	5	4	1.25		TNBC	TNBC1_PR	H2AFJ(12p)	CD44-CD24-	2	2	1
Her2	T1A	Lung	NUAK2(1q)	CD44+CD24+	6	3	2		TNBC	TNBC1_PR	H2AFJ(12p)	CD44-CD24-	3	2	1.5
Her2	T1A	Lung	NUAK2(1q)	CD44+CD24+	4	3	1.33333		TNBC	TNBC1_PR	H2AFJ(12p)	CD44-CD24-	3	1	3
Her2	T1A	Lung	NUAK2(1q)	CD44+CD24+	7	5	1.4		TNBC	TNBC1_PR	H2AFJ(12p)	CD44-CD24-	2	2	1
Her2	T1A	Lung	NUAK2(1q)	CD44+CD24+	6	5	1.2		TNBC	TNBC1_PR	H2AFJ(12p)	CD44-CD24-	2	1	2
Her2	T1A	Lung	NUAK2(1q)	CD44+CD24+	6	4	1.5		TNBC	TNBC1_PR	H2AFJ(12p)	CD44-CD24-	2	2	1
Her2	T1A	Lung	NUAK2(1q)	CD44+CD24+	6	6	1		TNBC	TNBC1_PR	H2AFJ(12p)	CD44-CD24-	2	2	1
Her2	T1A	Lung	NUAK2(1q)	CD44+CD24+	6	7	0.857143		TNBC	TNBC1_PR	H2AFJ(12p)	CD44-CD24-	2	2	1
Her2	T1A	Lung	NUAK2(1q)	CD44+CD24+	2	4	0.5		TNBC	TNBC1_PR	H2AFJ(12p)	CD44-CD24-	2	2	1
Her2	T1A	Lung	NUAK2(1q)	CD44+CD24+	7	4	1.75		TNBC	TNBC1_PR	H2AFJ(12p)	CD44-CD24-	1	1	1
Her2	T1A	Lung	NUAK2(1q)	CD44+CD24+	4	2	2		TNBC	TNBC1_PR	H2AFJ(12p)	CD44-CD24-	2	1	2
Her2	T1A	Lung	NUAK2(1q)	CD44+CD24+	7	2	3.5		TNBC	TNBC1_PR	H2AFJ(12p)	CD44-CD24-	2	1	2
Her2	T1A	Lung	NUAK2(1q)	CD44+CD24+	8	4	2		TNBC	TNBC1_PR	H2AFJ(12p)	CD44-CD24-	1	1	1
Her2	T1A	Lung	NUAK2(1q)	CD44+CD24+	1	6	0.166667		TNBC	TNBC1_PR	H2AFJ(12p)	CD44-CD24-	1	2	0.5
Her2	T1A	Lung	NUAK2(1q)	CD44+CD24+	7	3	2.33333		TNBC	TNBC1_PR	H2AFJ(12p)	CD44-CD24-	2	1	2
Her2	T1A	Lung	NUAK2(1q)	CD44+CD24+	4	2	2		TNBC	TNBC1_PR	H2AFJ(12p)	CD44-CD24-	1	2	0.5
Her2	T1A	Lung	NUAK2(1q)	CD44+CD24+	2	2	1		TNBC	TNBC1_PR	H2AFJ(12p)	CD44-CD24-	1	1	1
Her2	T1A	Lung	NUAK2(1q)	CD44+CD24+	1	6	0.166667		TNBC	TNBC1_PR	H2AFJ(12p)	CD44-CD24-	2	1	2
Her2	T1A	Lung	NUAK2(1q)	CD44+CD24+	5	5	1		TNBC	TNBC1_PR	H2AFJ(12p)	CD44-CD24-	1	1	1
Her2	T1A	Lung	NUAK2(1q)	CD44+CD24+	3	3	1		TNBC	TNBC1_PR	H2AFJ(12p)	CD44-CD24-	1	1	1
Her2	T1A	Lung	NUAK2(1q)	CD44+CD24+	4	6	0.666667		TNBC	TNBC1_PR	H2AFJ(12p)	CD44-CD24-	2	1	2
Her2	T1A	Lung	NUAK2(1q)	CD44+CD24+	3	2	1.5		TNBC	TNBC1_PR	H2AFJ(12p)	CD44-CD24-	2	1	2
Her2	T1A	Lung	NUAK2(1q)	CD44+CD24+	3	1	3		TNBC	TNBC1_PR	H2AFJ(12p)	CD44-CD24-	2	2	1
Her2	T1A	Lung	NUAK2(1q)	CD44+CD24+	5	4	1.25		TNBC	TNBC1_PR	H2AFJ(12p)	CD44-CD24-	1	1	1
Her2	T1A	Lung	NUAK2(1q)	CD44+CD24+	4	3	1.33333		TNBC	TNBC1_PR	H2AFJ(12p)	CD44-CD24-	2	1	2
Her2	T1A	Lung	NUAK2(1q)	CD44+CD24+	9	5	1.8		TNBC	TNBC1_PR	H2AFJ(12p)	CD44-CD24-	1	1	1
Her2	T1A	Lung	NUAK2(1q)	CD44+CD24+	3	3	1		TNBC	TNBC1_PR	H2AFJ(12p)	CD44-CD24-	2	1	2
Her2	T1A	Lung	NUAK2(1q)	CD44+CD24+	3	1	3		TNBC	TNBC1_PR	H2AFJ(12p)	CD44-CD24-	1	1	1
Her2	T1A	Lung	NUAK2(1q)	CD44+CD24+	3	6	0.5		TNBC	TNBC1_PR	H2AFJ(12p)	CD44-CD24-	2	2	1
Her2	T1A	Lung	NUAK2(1q)	CD44+CD24+	6	3	2		TNBC	TNBC1_PR	H2AFJ(12p)	CD44-CD24-	1	1	1
Her2	T1A	Lung	NUAK2(1q)	CD44+CD24+	3	3	1		TNBC	TNBC1_PR	H2AFJ(12p)	CD44-CD24-	2	2	1
Her2	T1A	Lung	NUAK2(1q)	CD44+CD24+	5	6	0.833333		TNBC	TNBC1_PR	H2AFJ(12p)	CD44-CD24-	1	1	1
Her2	T1A	Lung	NUAK2(1q)	CD44+CD24+	3	3	1		TNBC	TNBC1_PR	H2AFJ(12p)	CD44-CD24-	1	2	0.5
Her2	T1A	Lung	NUAK2(1q)	CD44+CD24+	2	2	1		TNBC	TNBC1_PR	H2AFJ(12p)	CD44-CD24-	1	1	1
Her2	T1A	Lung	NUAK2(1q)	CD44+CD24+	1	2	0.5		TNBC	TNBC1_PR	H2AFJ(12p)	CD44-CD24-	1	1	1
Her2	T1A	Lung	NUAK2(1q)	CD44+CD24+	1	2	0.5		TNBC	TNBC1_PR	H2AFJ(12p)	CD44-CD24-	2	2	1
Her2	T1A	Lung	NUAK2(1q)	CD44+CD24+	1	2	0.5		TNBC	TNBC1_PR	H2AFJ(12p)	CD44-CD24-	2	2	1
Her2	T1A	Lung	NUAK2(1q)	CD44+CD24+	6	2	3		TNBC	TNBC1_PR	H2AFJ(12p)	CD44-CD24-	1	1	1
Her2	T1A	Lung	NUAK2(1q)	CD44+CD24+	4	3	1.33333		TNBC	TNBC1_PR	H2AFJ(12p)	CD44-CD24-	1	1	1
Her2	T1A	Lung	NUAK2(1q)	CD44+CD24+	5	4	1.25		TNBC	TNBC1_PR	H2AFJ(12p)	CD44-CD24-	1	1	1
Her2	T1A	Lung	NUAK2(1q)	CD44+CD24+	6	4	1.5		TNBC	TNBC1_PR	H2AFJ(12p)	CD44-CD24-	1	1	1
Her2	T1A	Lung	NUAK2(1q)	CD44+CD24+	3	3	1		TNBC	TNBC1_PR	H2AFJ(12p)	CD44-CD24-	2	2	1
Her2	T1A	Lung	NUAK2(1q)	CD44+CD24+	11	5	2.2		TNBC	TNBC1_PR	H2AFJ(12p)	CD44-CD24-	1	1	1
Her2	T1A	Lung	NUAK2(1q)	CD44+CD24+	4	4	1		TNBC	TNBC1_PR	H2AFJ(12p)	CD44-CD24-	1	1	1
Her2	T1A	Lung	NUAK2(1q)	CD44+CD24+	5	4	1.25		TNBC	TNBC1_PR	H2AFJ(12p)	CD44-CD24-	1	1	1
Her2	T1A	Lung	NUAK2(1q)	CD44+CD24+	5	3	1.66667		TNBC	TNBC1_PR	H2AFJ(12p)	CD44-CD24-	2	2	1
Her2	T1A	Lung	NUAK2(1q)	CD44+CD24+	4	3	1.33333		TNBC	TNBC1_PR	H2AFJ(12p)	CD44-CD24-	2	1	2
Her2	T1A	Lung	NUAK2(1q)	CD44+CD24+	5	6	0.833333		TNBC	TNBC1_PR	H2AFJ(12p)	CD44-CD24-	2	2	1
Her2	T1A	Lung	NUAK2(1q)	CD44+CD24+	1	2	0.5		TNBC	TNBC1_PR	H2AFJ(12p)	CD44-CD24-	1	1	1
Her2	T1A	Lung	NUAK2(1q)	CD44+CD24+	6	4	1.5		TNBC	TNBC1_PR	H2AFJ(12p)	CD44-CD24-	1	1	1
Her2	T1A	Lung	NUAK2(1q)	CD44+CD24+	4	2	2		TNBC	TNBC1_PR	H2AFJ(12p)	CD44-CD24-	1	1	1
Her2	T1A	Lung	NUAK2(1q)	CD44+CD24+	11	10	1.1		TNBC	TNBC1_PR	H2AFJ(12p)	CD44-CD24-	1	1	1
Her2	T1A	Lung	NUAK2(1q)	CD44+CD24+	6	5	1.2		TNBC	TNBC1_PR	H2AFJ(12p)	CD44-CD24-	2	2	1
Her2	T1A	Lung	NUAK2(1q)	CD44+CD24+	5	8	0.625		TNBC	TNBC1_PR	H2AFJ(12p)	CD44-CD24-	1	1	1
Her2	T1A	Lung	NUAK2(1q)	CD44+CD24+	7	9	0.777778		TNBC	TNBC1_PR	H2AFJ(12p)	CD44-CD24-	0	1	0
Her2	T1A	Lung	NUAK2(1q)	CD44+CD24+	4	6	0.666667		TNBC	TNBC1_PR	H2AFJ(12p)	CD44-CD24-	1	1	1
Her2	T1A	Lung	NUAK2(1q)	CD44+CD24+	3	6	0.5		TNBC	TNBC1_PR	H2AFJ(12p)	CD44-CD24-	3	3	1
Her2	T1A	Lung	NUAK2(1q)	CD44+CD24+	4	3	1.33333		TNBC	TNBC1_PR	H2AFJ(12p)	CD44-CD24-	2	2	1
Her2	T1A	Lung	NUAK2(1q)	CD44+CD24+	4	3	1.33333		TNBC	TNBC1_PR	H2AFJ(12p)	CD44-CD24-	1	1	1
Her2	T1A	Lung	NUAK2(1q)	CD44+CD24+	4	3	1.33333		TNBC	TNBC1_PR	H2AFJ(12p)	CD44-CD24-	1	1	1
Her2	T1A	Lung	NUAK2(1q)	CD44+CD24+	4	6	0.666667		TNBC	TNBC1_PR	H2AFJ(12p)	CD44-CD24-	1	1	1
Her2	T1A	Lung	NUAK2(1q)	CD44+CD24+	3	5	0.6		TNBC	TNBC1_PR	H2AFJ(12p)	CD44-CD24-	1	1	1
Her2	T1A	Lung	NUAK2(1q)	CD44+CD24+	2	2	1		TNBC	TNBC1_PR	H2AFJ(12p)	CD44-CD24-	1	1	1
Her2	T1A	Lung	NUAK2(1q)	CD44+CD24+	5	2	2.5		TNBC	TNBC1_PR	H2AFJ(12p)	CD44-CD24-	1	1	1
Her2	T1A	Lung	NUAK2(1q)	CD44+CD24+	4	3	1.33333		TNBC	TNBC1_PR	H2AFJ(12p)	CD44-CD24-	1	1	1
Her2	T1A	Lung	NUAK2(1q)	CD44+CD24+	3	6	0.5		TNBC	TNBC1_PR	H2AFJ(12p)	CD44-CD24-	1	2	0.5
Her2	T1A	Lung	NUAK2(1q)	CD44+CD24+	2	5	0.4		TNBC	TNBC1_PR	H2AFJ(12p)	CD44-CD24-	2	2	1
Her2	T1A	Lung	NUAK2(1q)	CD44+CD24+	2	4	0.5		TNBC	TNBC1_PR	H2AFJ(12p)	CD44-CD24-	1	1	1
Her2	T1A	Lung	NUAK2(1q)	CD44+CD24+	3	2	1.5		TNBC	TNBC1_PR	H2AFJ(12p)	CD44-CD24-	1	1	1
Her2	T1A	Lung	NUAK2(1q)	CD44+CD24+	3	3	1		TNBC	TNBC1_PR	H2AFJ(12p)	CD44-CD24-	2	2	1
Her2	T1A	Lung	NUAK2(1q)	CD44+CD24+	2	5	0.4		TNBC	TNBC1_PR	H2AFJ(12p)	CD44-CD24-	1	1	1
Her2	T1A	Lung	NUAK2(1q)	CD44+CD24+	2	5	0.4		TNBC	TNBC1_PR	H2AFJ(12p)	CD44-CD24-	1	1	1
Her2	T1A	Lung	NUAK2(1q)	CD44+CD24+	5	5	1		TNBC	TNBC1_PR	H2AFJ(12p)	CD44-CD24-	1	1	1
Her2	T1A	Lung	NUAK2(1q)	CD44+CD24+	5	3	1.66667		TNBC	TNBC1_PR	H2AFJ(12p)	CD44-CD24-	0	1	0
Her2	T1A	Lung	NUAK2(1q)	CD44+CD24+	5	7	0.714286		TNBC	TNBC1_PR	H2AFJ(12p)	CD44-CD24-	1	2	0.5
Her2	T1A	Lung	NUAK2(1q)	CD44+CD24+	13	11	1.18182		TNBC	TNBC1_PR	H2AFJ(12p)	CD44-CD24-	2	2	1
Her2	T1A	Lung	NUAK2(1q)	CD44+CD24+	5	5	1		TNBC	TNBC1_PR	H2AFJ(12p)	CD44-CD24-	2	2	1
Her2	T1A	Lung	NUAK2(1q)	CD44+CD24+	5	3	1.66667		TNBC	TNBC1_PR	H2AFJ(12p)	CD44-CD24-	2	3	0.666667
Her2	T1A	Lung	NUAK2(1q)	CD44+CD24+	2	1	2		TNBC	TNBC1_PR	H2AFJ(12p)	CD44-CD24-	1	1	1
Her2	T1A	Lung	NUAK2(1q)	CD44+CD24+	5	4	1.25		TNBC	TNBC1_PR	H2AFJ(12p)	CD44-CD24-	3	3	1
Her2	T1A	Lung	NUAK2(1q)	CD44+CD24+	6	4	1.5		TNBC	TNBC1_PR	H2AFJ(12p)	CD44-CD24-	1	1	1
Her2	T1A	Lung	NUAK2(1q)	CD44+CD24+	1	1	1		TNBC	TNBC1_PR	H2AFJ(12p)	CD44-CD24-	3	2	1.5
Her2	T1A	Lung	NUAK2(1q)	CD44+CD24+	7	4	1.75		TNBC	TNBC1_PR	H2AFJ(12p)	CD44-CD24-	2	2	1
Her2	T1A	Lung	NUAK2(1q)	CD44+CD24+	8	6	1.33333		TNBC	TNBC1_PR	H2AFJ(12p)	CD44-CD24-	1	1	1
Her2	T1A	Lung	NUAK2(1q)	CD44+CD24+	5	2	2.5		TNBC	TNBC1_PR	H2AFJ(12p)	CD44-CD24-	1	1	1
Her2	T1A	Lung	NUAK2(1q)	CD44+CD24+	1	1	1		TNBC	TNBC1_PR	H2AFJ(12p)	CD44-CD24-	1	1	1
Her2	T1A	Lung	NUAK2(1q)	CD44+CD24+	8	9	0.888889		TNBC	TNBC1_PR	H2AFJ(12p)	CD44-CD24-	1	1	1
Her2	T1A	Lung	NUAK2(1q)	CD44+CD24+	3	1	3		TNBC	TNBC1_PR	H2AFJ(12p)	CD44-CD24-	1	1	1
Her2	T1A	Lung	NUAK2(1q)	CD44+CD24+	4	2	2		TNBC	TNBC1_PR	H2AFJ(12p)	CD44-CD24-	2	2	1
Her2	T1A	Lung	NUAK2(1q)	CD44+CD24+	7	11	0.636364		TNBC	TNBC1_PR	H2AFJ(12p)	CD44-CD24-	2	2	1
Her2	T1A	Lung	NUAK2(1q)	CD44+CD24+	1	1	1		TNBC	TNBC1_PR	H2AFJ(12p)	CD44-CD24-	2	1	2
Her2	T1A	Lung	NUAK2(1q)	CD44+CD24+	3	6	0.5		TNBC	TNBC1_PR	H2AFJ(12p)	CD44-CD24-	1	1	1
Her2	T1A	Lung	NUAK2(1q)	CD44+CD24+	3	2	1.5		TNBC	TNBC1_PR	H2AFJ(12p)	CD44-CD24-	1	1	1
Her2	T1A	Lung	NUAK2(1q)	CD44+CD24+	9	5	1.8		TNBC	TNBC1_PR	H2AFJ(12p)	CD44-CD24-	1	1	1
Her2	T1A	Lung	NUAK2(1q)	CD44+CD24+	4	3	1.33333		TNBC	TNBC1_PR	H2AFJ(12p)	CD44-CD24-	1	1	1
Her2	T1A	Lung	NUAK2(1q)	CD44-CD24+	6	2	3		TNBC	TNBC1_PR	ITGA8(10p)	CD44-CD24+	1	1	1
Her2	T1A	Lung	NUAK2(1q)	CD44-CD24+	3	1	3		TNBC	TNBC1_PR	ITGA8(10p)	CD44-CD24+	1	2	0.5
Her2	T1A	Lung	NUAK2(1q)	CD44-CD24+	3	3	1		TNBC	TNBC1_PR	ITGA8(10p)	CD44-CD24+	2	1	2
Her2	T1A	Lung	NUAK2(1q)	CD44-CD24+	4	2	2		TNBC	TNBC1_PR	ITGA8(10p)	CD44-CD24+	3	3	1
Her2	T1A	Lung	NUAK2(1q)	CD44-CD24+	5	6	0.833333		TNBC	TNBC1_PR	ITGA8(10p)	CD44-CD24+	2	3	0.666667
Her2	T1A	Lung	NUAK2(1q)	CD44-CD24+	7	5	1.4		TNBC	TNBC1_PR	ITGA8(10p)	CD44-CD24+	3	3	1
Her2	T1A	Lung	NUAK2(1q)	CD44-CD24+	5	4	1.25		TNBC	TNBC1_PR	ITGA8(10p)	CD44-CD24+	2	3	0.666667
Her2	T1A	Lung	NUAK2(1q)	CD44-CD24+	4	3	1.33333		TNBC	TNBC1_PR	ITGA8(10p)	CD44-CD24+	2	1	2
Her2	T1A	Lung	NUAK2(1q)	CD44-CD24+	5	5	1		TNBC	TNBC1_PR	ITGA8(10p)	CD44-CD24+	0	1	0
Her2	T1A	Lung	NUAK2(1q)	CD44-CD24+	6	4	1.5		TNBC	TNBC1_PR	ITGA8(10p)	CD44-CD24+	3	1	3
Her2	T1A	Lung	NUAK2(1q)	CD44-CD24+	6	8	0.75		TNBC	TNBC1_PR	ITGA8(10p)	CD44-CD24+	2	3	0.666667
Her2	T1A	Lung	NUAK2(1q)	CD44-CD24+	4	4	1		TNBC	TNBC1_PR	ITGA8(10p)	CD44-CD24+	3	3	1
Her2	T1A	Lung	NUAK2(1q)	CD44-CD24+	4	6	0.666667		TNBC	TNBC1_PR	ITGA8(10p)	CD44-CD24+	3	1	3
Her2	T1A	Lung	NUAK2(1q)	CD44-CD24+	4	3	1.33333		TNBC	TNBC1_PR	ITGA8(10p)	CD44-CD24+	3	2	1.5
Her2	T1A	Lung	NUAK2(1q)	CD44-CD24+	7	6	1.16667		TNBC	TNBC1_PR	ITGA8(10p)	CD44-CD24+	3	1	3
Her2	T1A	Lung	NUAK2(1q)	CD44-CD24+	5	7	0.714286		TNBC	TNBC1_PR	ITGA8(10p)	CD44-CD24+	2	1	2
Her2	T1A	Lung	NUAK2(1q)	CD44-CD24+	3	1	3		TNBC	TNBC1_PR	ITGA8(10p)	CD44-CD24+	1	1	1
Her2	T1A	Lung	NUAK2(1q)	CD44-CD24+	2	4	0.5		TNBC	TNBC1_PR	ITGA8(10p)	CD44-CD24+	1	2	0.5
Her2	T1A	Lung	NUAK2(1q)	CD44-CD24+	7	7	1		TNBC	TNBC1_PR	ITGA8(10p)	CD44-CD24+	2	3	0.666667
Her2	T1A	Lung	NUAK2(1q)	CD44-CD24+	2	2	1		TNBC	TNBC1_PR	ITGA8(10p)	CD44-CD24+	1	1	1
Her2	T1A	Lung	NUAK2(1q)	CD44-CD24+	5	4	1.25		TNBC	TNBC1_PR	ITGA8(10p)	CD44-CD24+	2	2	1
Her2	T1A	Lung	NUAK2(1q)	CD44-CD24+	5	3	1.66667		TNBC	TNBC1_PR	ITGA8(10p)	CD44-CD24+	3	3	1
Her2	T1A	Lung	NUAK2(1q)	CD44-CD24+	6	4	1.5		TNBC	TNBC1_PR	ITGA8(10p)	CD44-CD24+	2	3	0.666667
Her2	T1A	Lung	NUAK2(1q)	CD44-CD24+	5	7	0.714286		TNBC	TNBC1_PR	ITGA8(10p)	CD44-CD24+	1	1	1
Her2	T1A	Lung	NUAK2(1q)	CD44-CD24+	4	6	0.666667		TNBC	TNBC1_PR	ITGA8(10p)	CD44-CD24+	0	1	0
Her2	T1A	Lung	NUAK2(1q)	CD44-CD24+	3	7	0.428571		TNBC	TNBC1_PR	ITGA8(10p)	CD44-CD24+	2	3	0.666667
Her2	T1A	Lung	NUAK2(1q)	CD44-CD24+	1	5	0.2		TNBC	TNBC1_PR	ITGA8(10p)	CD44-CD24+	1	1	1
Her2	T1A	Lung	NUAK2(1q)	CD44-CD24+	1	1	1		TNBC	TNBC1_PR	ITGA8(10p)	CD44-CD24+	1	1	1
Her2	T1A	Lung	NUAK2(1q)	CD44-CD24+	3	2	1.5		TNBC	TNBC1_PR	ITGA8(10p)	CD44-CD24+	2	2	1
Her2	T1A	Lung	NUAK2(1q)	CD44-CD24+	2	4	0.5		TNBC	TNBC1_PR	ITGA8(10p)	CD44-CD24+	2	2	1
Her2	T1A	Lung	NUAK2(1q)	CD44-CD24+	2	5	0.4		TNBC	TNBC1_PR	ITGA8(10p)	CD44-CD24+	1	1	1
Her2	T1A	Lung	NUAK2(1q)	CD44-CD24+	3	5	0.6		TNBC	TNBC1_PR	ITGA8(10p)	CD44-CD24+	1	1	1
Her2	T1A	Lung	NUAK2(1q)	CD44-CD24+	1	5	0.2		TNBC	TNBC1_PR	ITGA8(10p)	CD44-CD24+	2	1	2
Her2	T1A	Lung	NUAK2(1q)	CD44-CD24+	3	5	0.6		TNBC	TNBC1_PR	ITGA8(10p)	CD44-CD24+	2	1	2
Her2	T1A	Lung	NUAK2(1q)	CD44-CD24+	2	3	0.666667		TNBC	TNBC1_PR	ITGA8(10p)	CD44-CD24+	3	5	0.6
Her2	T1A	Lung	NUAK2(1q)	CD44-CD24+	3	6	0.5		TNBC	TNBC1_PR	ITGA8(10p)	CD44-CD24+	2	2	1
Her2	T1A	Lung	NUAK2(1q)	CD44-CD24+	2	3	0.666667		TNBC	TNBC1_PR	ITGA8(10p)	CD44-CD24+	1	1	1
Her2	T1A	Lung	NUAK2(1q)	CD44-CD24+	3	4	0.75		TNBC	TNBC1_PR	ITGA8(10p)	CD44-CD24+	1	1	1
Her2	T1A	Lung	NUAK2(1q)	CD44-CD24+	3	3	1		TNBC	TNBC1_PR	ITGA8(10p)	CD44-CD24+	2	1	2
Her2	T1A	Lung	NUAK2(1q)	CD44-CD24+	3	3	1		TNBC	TNBC1_PR	ITGA8(10p)	CD44-CD24+	3	3	1
Her2	T1A	Lung	NUAK2(1q)	CD44-CD24+	4	3	1.33333		TNBC	TNBC1_PR	ITGA8(10p)	CD44-CD24+	2	2	1
Her2	T1A	Lung	NUAK2(1q)	CD44-CD24+	4	2	2		TNBC	TNBC1_PR	ITGA8(10p)	CD44-CD24+	1	1	1
Her2	T1A	Lung	NUAK2(1q)	CD44-CD24+	6	8	0.75		TNBC	TNBC1_PR	ITGA8(10p)	CD44-CD24+	1	1	1
Her2	T1A	Lung	NUAK2(1q)	CD44-CD24+	5	5	1		TNBC	TNBC1_PR	ITGA8(10p)	CD44-CD24+	2	2	1
Her2	T1A	Lung	NUAK2(1q)	CD44-CD24+	4	2	2		TNBC	TNBC1_PR	ITGA8(10p)	CD44-CD24+	1	1	1
Her2	T1A	Lung	NUAK2(1q)	CD44-CD24+	2	4	0.5		TNBC	TNBC1_PR	ITGA8(10p)	CD44-CD24+	2	2	1
Her2	T1A	Lung	NUAK2(1q)	CD44-CD24+	4	1	4		TNBC	TNBC1_PR	ITGA8(10p)	CD44-CD24+	2	1	2
Her2	T1A	Lung	NUAK2(1q)	CD44-CD24+	6	6	1		TNBC	TNBC1_PR	ITGA8(10p)	CD44-CD24+	1	1	1
Her2	T1A	Lung	NUAK2(1q)	CD44-CD24+	3	3	1		TNBC	TNBC1_PR	ITGA8(10p)	CD44-CD24+	3	3	1
Her2	T1A	Lung	NUAK2(1q)	CD44-CD24+	4	2	2		TNBC	TNBC1_PR	ITGA8(10p)	CD44-CD24+	1	1	1
Her2	T1A	Lung	NUAK2(1q)	CD44-CD24+	3	3	1		TNBC	TNBC1_PR	ITGA8(10p)	CD44-CD24+	2	3	0.666667
Her2	T1A	Lung	NUAK2(1q)	CD44-CD24+	5	3	1.66667		TNBC	TNBC1_PR	ITGA8(10p)	CD44-CD24+	2	2	1
Her2	T1A	Lung	NUAK2(1q)	CD44-CD24+	5	3	1.66667		TNBC	TNBC1_PR	ITGA8(10p)	CD44-CD24+	1	2	0.5
Her2	T1A	Lung	NUAK2(1q)	CD44-CD24+	5	6	0.833333		TNBC	TNBC1_PR	ITGA8(10p)	CD44-CD24+	2	2	1
Her2	T1A	Lung	NUAK2(1q)	CD44-CD24+	2	4	0.5		TNBC	TNBC1_PR	ITGA8(10p)	CD44-CD24+	1	1	1
Her2	T1A	Lung	NUAK2(1q)	CD44-CD24+	1	2	0.5		TNBC	TNBC1_PR	ITGA8(10p)	CD44-CD24+	2	1	2
Her2	T1A	Lung	NUAK2(1q)	CD44-CD24+	6	7	0.857143		TNBC	TNBC1_PR	ITGA8(10p)	CD44-CD24+	1	1	1
Her2	T1A	Lung	NUAK2(1q)	CD44-CD24+	3	3	1		TNBC	TNBC1_PR	ITGA8(10p)	CD44-CD24+	3	2	1.5
Her2	T1A	Lung	NUAK2(1q)	CD44-CD24+	6	5	1.2		TNBC	TNBC1_PR	ITGA8(10p)	CD44-CD24+	1	1	1
Her2	T1A	Lung	NUAK2(1q)	CD44-CD24+	5	3	1.66667		TNBC	TNBC1_PR	ITGA8(10p)	CD44-CD24+	1	1	1
Her2	T1A	Lung	NUAK2(1q)	CD44-CD24+	2	5	0.4		TNBC	TNBC1_PR	ITGA8(10p)	CD44-CD24+	0	3	0
Her2	T1A	Lung	NUAK2(1q)	CD44-CD24+	3	3	1		TNBC	TNBC1_PR	ITGA8(10p)	CD44-CD24+	3	2	1.5
Her2	T1A	Lung	NUAK2(1q)	CD44-CD24+	3	3	1		TNBC	TNBC1_PR	ITGA8(10p)	CD44-CD24+	3	2	1.5
Her2	T1A	Lung	NUAK2(1q)	CD44-CD24+	2	3	0.666667		TNBC	TNBC1_PR	ITGA8(10p)	CD44-CD24+	3	3	1
Her2	T1A	Lung	NUAK2(1q)	CD44-CD24+	2	6	0.333333		TNBC	TNBC1_PR	ITGA8(10p)	CD44-CD24+	3	2	1.5
Her2	T1A	Lung	NUAK2(1q)	CD44-CD24+	13	5	2.6		TNBC	TNBC1_PR	ITGA8(10p)	CD44-CD24+	3	2	1.5
Her2	T1A	Lung	NUAK2(1q)	CD44-CD24+	2	2	1		TNBC	TNBC1_PR	ITGA8(10p)	CD44-CD24+	2	3	0.666667
Her2	T1A	Lung	NUAK2(1q)	CD44-CD24+	12	7	1.71429		TNBC	TNBC1_PR	ITGA8(10p)	CD44-CD24+	1	1	1
Her2	T1A	Lung	NUAK2(1q)	CD44-CD24+	5	6	0.833333		TNBC	TNBC1_PR	ITGA8(10p)	CD44-CD24+	1	1	1
Her2	T1A	Lung	NUAK2(1q)	CD44-CD24+	4	4	1		TNBC	TNBC1_PR	ITGA8(10p)	CD44-CD24+	1	1	1
Her2	T1A	Lung	NUAK2(1q)	CD44-CD24+	2	3	0.666667		TNBC	TNBC1_PR	ITGA8(10p)	CD44-CD24+	4	4	1
Her2	T1A	Lung	NUAK2(1q)	CD44-CD24+	2	2	1		TNBC	TNBC1_PR	ITGA8(10p)	CD44-CD24+	3	2	1.5
Her2	T1A	Lung	NUAK2(1q)	CD44-CD24+	3	2	1.5		TNBC	TNBC1_PR	ITGA8(10p)	CD44-CD24+	1	1	1
Her2	T1A	Lung	NUAK2(1q)	CD44-CD24+	4	4	1		TNBC	TNBC1_PR	ITGA8(10p)	CD44-CD24+	3	3	1
Her2	T1A	Lung	NUAK2(1q)	CD44-CD24+	4	4	1		TNBC	TNBC1_PR	ITGA8(10p)	CD44-CD24+	3	3	1
Her2	T1A	Lung	NUAK2(1q)	CD44-CD24+	5	3	1.66667		TNBC	TNBC1_PR	ITGA8(10p)	CD44-CD24+	2	2	1
Her2	T1A	Lung	NUAK2(1q)	CD44-CD24+	4	3	1.33333		TNBC	TNBC1_PR	ITGA8(10p)	CD44-CD24+	0	2	0
Her2	T1A	Lung	NUAK2(1q)	CD44-CD24+	5	5	1		TNBC	TNBC1_PR	ITGA8(10p)	CD44-CD24+	3	3	1
Her2	T1A	Lung	NUAK2(1q)	CD44-CD24+	2	2	1		TNBC	TNBC1_PR	ITGA8(10p)	CD44-CD24+	1	1	1
Her2	T1A	Lung	NUAK2(1q)	CD44-CD24+	7	7	1		TNBC	TNBC1_PR	ITGA8(10p)	CD44-CD24+	1	1	1
Her2	T1A	Lung	NUAK2(1q)	CD44-CD24+	2	2	1		TNBC	TNBC1_PR	ITGA8(10p)	CD44-CD24+	2	2	1
Her2	T1A	Lung	NUAK2(1q)	CD44-CD24+	2	2	1		TNBC	TNBC1_PR	ITGA8(10p)	CD44-CD24+	3	3	1
Her2	T1A	Lung	NUAK2(1q)	CD44-CD24+	2	1	2		TNBC	TNBC1_PR	ITGA8(10p)	CD44-CD24+	3	3	1
Her2	T1A	Lung	NUAK2(1q)	CD44-CD24+	3	2	1.5		TNBC	TNBC1_PR	ITGA8(10p)	CD44-CD24+	3	3	1
Her2	T1A	Lung	NUAK2(1q)	CD44-CD24+	4	3	1.33333		TNBC	TNBC1_PR	ITGA8(10p)	CD44-CD24+	3	2	1.5
Her2	T1A	Lung	NUAK2(1q)	CD44-CD24+	5	5	1		TNBC	TNBC1_PR	ITGA8(10p)	CD44-CD24+	1	2	0.5
Her2	T1A	Lung	NUAK2(1q)	CD44-CD24+	1	2	0.5		TNBC	TNBC1_PR	ITGA8(10p)	CD44-CD24+	0	1	0
Her2	T1A	Lung	NUAK2(1q)	CD44-CD24+	4	3	1.33333		TNBC	TNBC1_PR	ITGA8(10p)	CD44-CD24+	2	2	1
Her2	T1A	Lung	NUAK2(1q)	CD44-CD24+	8	7	1.14286		TNBC	TNBC1_PR	ITGA8(10p)	CD44-CD24+	3	5	0.6
Her2	T1A	Lung	NUAK2(1q)	CD44-CD24+	3	6	0.5		TNBC	TNBC1_PR	ITGA8(10p)	CD44-CD24+	2	1	2
Her2	T1A	Lung	NUAK2(1q)	CD44-CD24+	4	3	1.33333		TNBC	TNBC1_PR	ITGA8(10p)	CD44-CD24+	3	3	1
Her2	T1A	Lung	NUAK2(1q)	CD44-CD24+	4	3	1.33333		TNBC	TNBC1_PR	ITGA8(10p)	CD44-CD24+	2	2	1
Her2	T1A	Lung	NUAK2(1q)	CD44-CD24+	2	2	1		TNBC	TNBC1_PR	ITGA8(10p)	CD44-CD24+	1	1	1
Her2	T1A	Lung	NUAK2(1q)	CD44-CD24+	2	1	2		TNBC	TNBC1_PR	ITGA8(10p)	CD44-CD24+	0	1	0
Her2	T1A	Lung	NUAK2(1q)	CD44-CD24+	4	3	1.33333		TNBC	TNBC1_PR	ITGA8(10p)	CD44-CD24+	0	1	0
Her2	T1A	Lung	NUAK2(1q)	CD44-CD24+	2	1	2		TNBC	TNBC1_PR	ITGA8(10p)	CD44-CD24+	2	2	1
Her2	T1A	Lung	NUAK2(1q)	CD44-CD24+	1	2	0.5		TNBC	TNBC1_PR	ITGA8(10p)	CD44-CD24+	2	2	1
Her2	T1A	Lung	NUAK2(1q)	CD44-CD24+	1	2	0.5		TNBC	TNBC1_PR	ITGA8(10p)	CD44-CD24+	3	2	1.5
Her2	T1A	Lung	NUAK2(1q)	CD44-CD24+	3	3	1		TNBC	TNBC1_PR	ITGA8(10p)	CD44-CD24+	1	1	1
Her2	T1A	Lung	NUAK2(1q)	CD44-CD24+	4	3	1.33333		TNBC	TNBC1_PR	ITGA8(10p)	CD44-CD24+	3	3	1
Her2	T1A	Lung	NUAK2(1q)	CD44-CD24-	9	7	1.28571		TNBC	TNBC1_PR	ITGA8(10p)	CD44-CD24-	1	1	1
Her2	T1A	Lung	NUAK2(1q)	CD44-CD24-	7	6	1.16667		TNBC	TNBC1_PR	ITGA8(10p)	CD44-CD24-	1	1	1
Her2	T1A	Lung	NUAK2(1q)	CD44-CD24-	3	4	0.75		TNBC	TNBC1_PR	ITGA8(10p)	CD44-CD24-	1	1	1
Her2	T1A	Lung	NUAK2(1q)	CD44-CD24-	2	4	0.5		TNBC	TNBC1_PR	ITGA8(10p)	CD44-CD24-	4	4	1
Her2	T1A	Lung	NUAK2(1q)	CD44-CD24-	2	3	0.666667		TNBC	TNBC1_PR	ITGA8(10p)	CD44-CD24-	1	1	1
Her2	T1A	Lung	NUAK2(1q)	CD44-CD24-	2	3	0.666667		TNBC	TNBC1_PR	ITGA8(10p)	CD44-CD24-	3	2	1.5
Her2	T1A	Lung	NUAK2(1q)	CD44-CD24-	7	1	7		TNBC	TNBC1_PR	ITGA8(10p)	CD44-CD24-	1	1	1
Her2	T1A	Lung	NUAK2(1q)	CD44-CD24-	3	2	1.5		TNBC	TNBC1_PR	ITGA8(10p)	CD44-CD24-	1	1	1
Her2	T1A	Lung	NUAK2(1q)	CD44-CD24-	6	4	1.5		TNBC	TNBC1_PR	ITGA8(10p)	CD44-CD24-	1	1	1
Her2	T1A	Lung	NUAK2(1q)	CD44-CD24-	6	4	1.5		TNBC	TNBC1_PR	ITGA8(10p)	CD44-CD24-	1	1	1
Her2	T1A	Lung	NUAK2(1q)	CD44-CD24-	2	1	2		TNBC	TNBC1_PR	ITGA8(10p)	CD44-CD24-	3	2	1.5
Her2	T1A	Lung	NUAK2(1q)	CD44-CD24-	1	2	0.5		TNBC	TNBC1_PR	ITGA8(10p)	CD44-CD24-	1	1	1
Her2	T1A	Lung	NUAK2(1q)	CD44-CD24-	6	8	0.75		TNBC	TNBC1_PR	ITGA8(10p)	CD44-CD24-	1	1	1
Her2	T1A	Lung	NUAK2(1q)	CD44-CD24-	3	3	1		TNBC	TNBC1_PR	ITGA8(10p)	CD44-CD24-	4	1	4
Her2	T1A	Lung	NUAK2(1q)	CD44-CD24-	5	4	1.25		TNBC	TNBC1_PR	ITGA8(10p)	CD44-CD24-	2	2	1
Her2	T1A	Lung	NUAK2(1q)	CD44-CD24-	8	7	1.14286		TNBC	TNBC1_PR	ITGA8(10p)	CD44-CD24-	1	1	1
Her2	T1A	Lung	NUAK2(1q)	CD44-CD24-	4	4	1		TNBC	TNBC1_PR	ITGA8(10p)	CD44-CD24-	2	2	1
Her2	T1A	Lung	NUAK2(1q)	CD44-CD24-	2	2	1		TNBC	TNBC1_PR	ITGA8(10p)	CD44-CD24-	2	1	2
Her2	T1A	Lung	NUAK2(1q)	CD44-CD24-	2	5	0.4		TNBC	TNBC1_PR	ITGA8(10p)	CD44-CD24-	2	2	1
Her2	T1A	Lung	NUAK2(1q)	CD44-CD24-	3	3	1		TNBC	TNBC1_PR	ITGA8(10p)	CD44-CD24-	2	2	1
Her2	T1A	Lung	NUAK2(1q)	CD44-CD24-	7	4	1.75		TNBC	TNBC1_PR	ITGA8(10p)	CD44-CD24-	1	1	1
Her2	T1A	Lung	NUAK2(1q)	CD44-CD24-	3	1	3		TNBC	TNBC1_PR	ITGA8(10p)	CD44-CD24-	1	1	1
Her2	T1A	Lung	NUAK2(1q)	CD44-CD24-	6	6	1		TNBC	TNBC1_PR	ITGA8(10p)	CD44-CD24-	2	2	1
Her2	T1A	Lung	NUAK2(1q)	CD44-CD24-	2	3	0.666667		TNBC	TNBC1_PR	ITGA8(10p)	CD44-CD24-	2	2	1
Her2	T1A	Lung	NUAK2(1q)	CD44-CD24-	3	5	0.6		TNBC	TNBC1_PR	ITGA8(10p)	CD44-CD24-	2	2	1
Her2	T1A	Lung	NUAK2(1q)	CD44-CD24-	6	2	3		TNBC	TNBC1_PR	ITGA8(10p)	CD44-CD24-	3	2	1.5
Her2	T1A	Lung	NUAK2(1q)	CD44-CD24-	2	2	1		TNBC	TNBC1_PR	ITGA8(10p)	CD44-CD24-	1	1	1
Her2	T1A	Lung	NUAK2(1q)	CD44-CD24-	3	1	3		TNBC	TNBC1_PR	ITGA8(10p)	CD44-CD24-	4	4	1
Her2	T1A	Lung	NUAK2(1q)	CD44-CD24-	3	3	1		TNBC	TNBC1_PR	ITGA8(10p)	CD44-CD24-	3	4	0.75
Her2	T1A	Lung	NUAK2(1q)	CD44-CD24-	6	7	0.857143		TNBC	TNBC1_PR	ITGA8(10p)	CD44-CD24-	3	4	0.75
Her2	T1A	Lung	NUAK2(1q)	CD44-CD24-	3	3	1		TNBC	TNBC1_PR	ITGA8(10p)	CD44-CD24-	3	2	1.5
Her2	T1A	Lung	NUAK2(1q)	CD44-CD24-	4	3	1.33333		TNBC	TNBC1_PR	ITGA8(10p)	CD44-CD24-	3	2	1.5
Her2	T1A	Lung	NUAK2(1q)	CD44-CD24-	5	5	1		TNBC	TNBC1_PR	ITGA8(10p)	CD44-CD24-	2	2	1
Her2	T1A	Lung	NUAK2(1q)	CD44-CD24-	7	5	1.4		TNBC	TNBC1_PR	ITGA8(10p)	CD44-CD24-	2	2	1
Her2	T1A	Lung	NUAK2(1q)	CD44-CD24-	6	5	1.2		TNBC	TNBC1_PR	ITGA8(10p)	CD44-CD24-	1	1	1
Her2	T1A	Lung	NUAK2(1q)	CD44-CD24-	4	3	1.33333		TNBC	TNBC1_PR	ITGA8(10p)	CD44-CD24-	1	1	1
Her2	T1A	Lung	NUAK2(1q)	CD44-CD24-	3	3	1		TNBC	TNBC1_PR	ITGA8(10p)	CD44-CD24-	1	1	1
Her2	T1A	Lung	NUAK2(1q)	CD44-CD24-	4	3	1.33333		TNBC	TNBC1_PR	ITGA8(10p)	CD44-CD24-	1	2	0.5
Her2	T1A	Lung	NUAK2(1q)	CD44-CD24-	5	5	1		TNBC	TNBC1_PR	ITGA8(10p)	CD44-CD24-	0	1	0
Her2	T1A	Lung	NUAK2(1q)	CD44-CD24-	7	5	1.4		TNBC	TNBC1_PR	ITGA8(10p)	CD44-CD24-	0	1	0
Her2	T1A	Lung	NUAK2(1q)	CD44-CD24-	3	1	3		TNBC	TNBC1_PR	ITGA8(10p)	CD44-CD24-	1	1	1
Her2	T1A	Lung	NUAK2(1q)	CD44-CD24-	4	4	1		TNBC	TNBC1_PR	ITGA8(10p)	CD44-CD24-	2	2	1
Her2	T1A	Lung	NUAK2(1q)	CD44-CD24-	5	6	0.833333		TNBC	TNBC1_PR	ITGA8(10p)	CD44-CD24-	2	2	1
Her2	T1A	Lung	NUAK2(1q)	CD44-CD24-	5	4	1.25		TNBC	TNBC1_PR	ITGA8(10p)	CD44-CD24-	2	2	1
Her2	T1A	Lung	NUAK2(1q)	CD44-CD24-	4	4	1		TNBC	TNBC1_PR	ITGA8(10p)	CD44-CD24-	2	1	2
Her2	T1A	Lung	NUAK2(1q)	CD44-CD24-	7	7	1		TNBC	TNBC1_PR	ITGA8(10p)	CD44-CD24-	2	1	2
Her2	T1A	Lung	NUAK2(1q)	CD44-CD24-	5	4	1.25		TNBC	TNBC1_PR	ITGA8(10p)	CD44-CD24-	1	2	0.5
Her2	T1A	Lung	NUAK2(1q)	CD44-CD24-	3	3	1		TNBC	TNBC1_PR	ITGA8(10p)	CD44-CD24-	1	1	1
Her2	T1A	Lung	NUAK2(1q)	CD44-CD24-	4	4	1		TNBC	TNBC1_PR	ITGA8(10p)	CD44-CD24-	1	1	1
Her2	T1A	Lung	NUAK2(1q)	CD44-CD24-	2	2	1		TNBC	TNBC1_PR	ITGA8(10p)	CD44-CD24-	0	1	0
Her2	T1A	Lung	NUAK2(1q)	CD44-CD24-	6	6	1		TNBC	TNBC1_PR	ITGA8(10p)	CD44-CD24-	1	1	1
Her2	T1A	Lung	NUAK2(1q)	CD44-CD24-	6	5	1.2		TNBC	TNBC1_PR	ITGA8(10p)	CD44-CD24-	1	1	1
Her2	T1A	Lung	NUAK2(1q)	CD44-CD24-	6	6	1		TNBC	TNBC1_PR	ITGA8(10p)	CD44-CD24-	2	2	1
Her2	T1A	Lung	NUAK2(1q)	CD44-CD24-	5	4	1.25		TNBC	TNBC1_PR	ITGA8(10p)	CD44-CD24-	2	2	1
Her2	T1A	Lung	NUAK2(1q)	CD44-CD24-	2	2	1		TNBC	TNBC1_PR	ITGA8(10p)	CD44-CD24-	3	2	1.5
Her2	T1A	Lung	NUAK2(1q)	CD44-CD24-	7	7	1		TNBC	TNBC1_PR	ITGA8(10p)	CD44-CD24-	3	1	3
Her2	T1A	Lung	NUAK2(1q)	CD44-CD24-	3	2	1.5		TNBC	TNBC1_PR	ITGA8(10p)	CD44-CD24-	1	1	1
Her2	T1A	Lung	NUAK2(1q)	CD44-CD24-	4	1	4		TNBC	TNBC1_PR	ITGA8(10p)	CD44-CD24-	1	1	1
Her2	T1A	Lung	NUAK2(1q)	CD44-CD24-	3	2	1.5		TNBC	TNBC1_PR	ITGA8(10p)	CD44-CD24-	1	1	1
Her2	T1A	Lung	NUAK2(1q)	CD44-CD24-	2	1	2		TNBC	TNBC1_PR	ITGA8(10p)	CD44-CD24-	0	1	0
Her2	T1A	Lung	NUAK2(1q)	CD44-CD24-	2	2	1		TNBC	TNBC1_PR	ITGA8(10p)	CD44-CD24-	0	1	0
Her2	T1A	Lung	NUAK2(1q)	CD44-CD24-	4	3	1.33333		TNBC	TNBC1_PR	ITGA8(10p)	CD44-CD24-	0	2	0
Her2	T1A	Lung	NUAK2(1q)	CD44-CD24-	10	7	1.42857		TNBC	TNBC1_PR	ITGA8(10p)	CD44-CD24-	1	2	0.5
Her2	T1A	Lung	NUAK2(1q)	CD44-CD24-	2	1	2		TNBC	TNBC1_PR	ITGA8(10p)	CD44-CD24-	1	1	1
Her2	T1A	Lung	NUAK2(1q)	CD44-CD24-	7	6	1.16667		TNBC	TNBC1_PR	ITGA8(10p)	CD44-CD24-	1	1	1
Her2	T1A	Lung	NUAK2(1q)	CD44-CD24-	0	3	0		TNBC	TNBC1_PR	ITGA8(10p)	CD44-CD24-	1	1	1
Her2	T1A	Lung	NUAK2(1q)	CD44-CD24-	4	3	1.33333		TNBC	TNBC1_PR	ITGA8(10p)	CD44-CD24-	4	4	1
Her2	T1A	Lung	NUAK2(1q)	CD44-CD24-	3	3	1		TNBC	TNBC1_PR	ITGA8(10p)	CD44-CD24-	3	2	1.5
Her2	T1A	Lung	NUAK2(1q)	CD44-CD24-	7	3	2.33333		TNBC	TNBC1_PR	ITGA8(10p)	CD44-CD24-	3	2	1.5
Her2	T1A	Lung	NUAK2(1q)	CD44-CD24-	2	2	1		TNBC	TNBC1_PR	ITGA8(10p)	CD44-CD24-	1	1	1
Her2	T1A	Lung	621K8(8q)	CD44+CD24-	7	6	1.16667		TNBC	TNBC1_PR	ITGA8(10p)	CD44-CD24-	2	2	1
Her2	T1A	Lung	621K8(8q)	CD44+CD24-	4	2	2		TNBC	TNBC1_PR	ITGA8(10p)	CD44-CD24-	1	1	1
Her2	T1A	Lung	621K8(8q)	CD44+CD24-	6	3	2		TNBC	TNBC1_PR	ITGA8(10p)	CD44-CD24-	2	2	1
Her2	T1A	Lung	621K8(8q)	CD44+CD24-	2	2	1		TNBC	TNBC1_PR	ITGA8(10p)	CD44-CD24-	2	1	2
Her2	T1A	Lung	621K8(8q)	CD44+CD24-	3	2	1.5		TNBC	TNBC1_PR	ITGA8(10p)	CD44-CD24-	0	1	0
Her2	T1A	Lung	621K8(8q)	CD44+CD24-	1	1	1		TNBC	TNBC1_PR	ITGA8(10p)	CD44-CD24-	0	1	0
Her2	T1A	Lung	621K8(8q)	CD44+CD24-	2	1	2		TNBC	TNBC1_PR	ITGA8(10p)	CD44-CD24-	2	2	1
Her2	T1A	Lung	621K8(8q)	CD44+CD24-	4	3	1.33333		TNBC	TNBC1_PR	ITGA8(10p)	CD44-CD24-	1	2	0.5
Her2	T1A	Lung	621K8(8q)	CD44+CD24-	5	2	2.5		TNBC	TNBC1_PR	ITGA8(10p)	CD44-CD24-	1	1	1
Her2	T1A	Lung	621K8(8q)	CD44+CD24-	4	2	2		TNBC	TNBC1_PR	ITGA8(10p)	CD44-CD24-	3	2	1.5
Her2	T1A	Lung	621K8(8q)	CD44+CD24-	4	3	1.33333		TNBC	TNBC1_PR	ITGA8(10p)	CD44-CD24-	0	1	0
Her2	T1A	Lung	621K8(8q)	CD44+CD24-	6	4	1.5		TNBC	TNBC1_PR	ITGA8(10p)	CD44-CD24-	0	1	0
Her2	T1A	Lung	621K8(8q)	CD44+CD24-	4	3	1.33333		TNBC	TNBC1_PR	ITGA8(10p)	CD44-CD24-	1	2	0.5
Her2	T1A	Lung	621K8(8q)	CD44+CD24-	5	1	5		TNBC	TNBC1_PR	ITGA8(10p)	CD44-CD24-	1	2	0.5
Her2	T1A	Lung	621K8(8q)	CD44+CD24-	9	3	3		TNBC	TNBC1_PR	ITGA8(10p)	CD44-CD24-	1	2	0.5
Her2	T1A	Lung	621K8(8q)	CD44+CD24-	4	3	1.33333		TNBC	TNBC1_PR	ITGA8(10p)	CD44-CD24-	0	1	0
Her2	T1A	Lung	621K8(8q)	CD44+CD24-	7	3	2.33333		TNBC	TNBC1_PR	ITGA8(10p)	CD44-CD24-	1	1	1
Her2	T1A	Lung	621K8(8q)	CD44+CD24-	6	4	1.5		TNBC	TNBC1_PR	ITGA8(10p)	CD44-CD24-	1	1	1
Her2	T1A	Lung	621K8(8q)	CD44+CD24-	2	2	1		TNBC	TNBC1_PR	ITGA8(10p)	CD44-CD24-	1	2	0.5
Her2	T1A	Lung	621K8(8q)	CD44+CD24-	7	2	3.5		TNBC	TNBC1_PR	ITGA8(10p)	CD44-CD24-	0	2	0
Her2	T1A	Lung	621K8(8q)	CD44+CD24-	5	3	1.66667		TNBC	TNBC1_PR	ITGA8(10p)	CD44-CD24-	0	1	0
Her2	T1A	Lung	621K8(8q)	CD44+CD24-	6	1	6		TNBC	TNBC1_PR	ITGA8(10p)	CD44-CD24-	3	2	1.5
Her2	T1A	Lung	621K8(8q)	CD44+CD24-	6	3	2		TNBC	TNBC1_PR	ITGA8(10p)	CD44-CD24-	3	2	1.5
Her2	T1A	Lung	621K8(8q)	CD44+CD24-	4	2	2		TNBC	TNBC1_PR	ITGA8(10p)	CD44-CD24-	1	1	1
Her2	T1A	Lung	621K8(8q)	CD44+CD24-	2	2	1		TNBC	TNBC1_PR	ITGA8(10p)	CD44-CD24-	3	1	3
Her2	T1A	Lung	621K8(8q)	CD44+CD24-	9	4	2.25		TNBC	TNBC1_PR	ITGA8(10p)	CD44-CD24-	1	1	1
Her2	T1A	Lung	621K8(8q)	CD44+CD24-	9	4	2.25		TNBC	TNBC1_PR	ITGA8(10p)	CD44-CD24-	1	1	1
Her2	T1A	Lung	621K8(8q)	CD44+CD24-	12	4	3		TNBC	TNBC1_PR	ITGA8(10p)	CD44-CD24-	1	1	1
Her2	T1A	Lung	621K8(8q)	CD44+CD24-	5	2	2.5		TNBC	TNBC1_PR	ITGA8(10p)	CD44-CD24-	1	1	1
Her2	T1A	Lung	621K8(8q)	CD44+CD24-	1	1	1		TNBC	TNBC1_PR	ITGA8(10p)	CD44-CD24-	1	1	1
Her2	T1A	Lung	621K8(8q)	CD44+CD24-	8	2	4		TNBC	TNBC1_PR	621K8(8q)	CD44-CD24+	1	2	0.5
Her2	T1A	Lung	621K8(8q)	CD44+CD24-	3	1	3		TNBC	TNBC1_PR	621K8(8q)	CD44-CD24+	2	2	1
Her2	T1A	Lung	621K8(8q)	CD44+CD24-	5	2	2.5		TNBC	TNBC1_PR	621K8(8q)	CD44-CD24+	1	1	1
Her2	T1A	Lung	621K8(8q)	CD44+CD24-	2	2	1		TNBC	TNBC1_PR	621K8(8q)	CD44-CD24+	1	1	1
Her2	T1A	Lung	621K8(8q)	CD44+CD24-	9	4	2.25		TNBC	TNBC1_PR	621K8(8q)	CD44-CD24+	1	1	1
Her2	T1A	Lung	621K8(8q)	CD44+CD24-	6	3	2		TNBC	TNBC1_PR	621K8(8q)	CD44-CD24+	1	1	1
Her2	T1A	Lung	621K8(8q)	CD44+CD24-	1	2	0.5		TNBC	TNBC1_PR	621K8(8q)	CD44-CD24+	1	2	0.5
Her2	T1A	Lung	621K8(8q)	CD44+CD24-	6	1	6		TNBC	TNBC1_PR	621K8(8q)	CD44-CD24+	2	2	1
Her2	T1A	Lung	621K8(8q)	CD44+CD24-	11	6	1.83333		TNBC	TNBC1_PR	621K8(8q)	CD44-CD24+	1	1	1
Her2	T1A	Lung	621K8(8q)	CD44+CD24-	5	2	2.5		TNBC	TNBC1_PR	621K8(8q)	CD44-CD24+	1	2	0.5
Her2	T1A	Lung	621K8(8q)	CD44+CD24-	8	3	2.66667		TNBC	TNBC1_PR	621K8(8q)	CD44-CD24+	2	2	1
Her2	T1A	Lung	621K8(8q)	CD44+CD24-	3	1	3		TNBC	TNBC1_PR	621K8(8q)	CD44-CD24+	2	1	2
Her2	T1A	Lung	621K8(8q)	CD44+CD24-	2	2	1		TNBC	TNBC1_PR	621K8(8q)	CD44-CD24+	2	3	0.666667
Her2	T1A	Lung	621K8(8q)	CD44+CD24-	5	2	2.5		TNBC	TNBC1_PR	621K8(8q)	CD44-CD24+	2	2	1
Her2	T1A	Lung	621K8(8q)	CD44+CD24-	5	2	2.5		TNBC	TNBC1_PR	621K8(8q)	CD44-CD24+	1	1	1
Her2	T1A	Lung	621K8(8q)	CD44+CD24-	4	2	2		TNBC	TNBC1_PR	621K8(8q)	CD44-CD24+	1	1	1
Her2	T1A	Lung	621K8(8q)	CD44+CD24-	3	4	0.75		TNBC	TNBC1_PR	621K8(8q)	CD44-CD24+	1	1	1
Her2	T1A	Lung	621K8(8q)	CD44+CD24-	4	2	2		TNBC	TNBC1_PR	621K8(8q)	CD44-CD24+	1	1	1
Her2	T1A	Lung	621K8(8q)	CD44+CD24-	4	4	1		TNBC	TNBC1_PR	621K8(8q)	CD44-CD24+	1	1	1
Her2	T1A	Lung	621K8(8q)	CD44+CD24-	1	2	0.5		TNBC	TNBC1_PR	621K8(8q)	CD44-CD24+	3	2	1.5
Her2	T1A	Lung	621K8(8q)	CD44+CD24-	3	2	1.5		TNBC	TNBC1_PR	621K8(8q)	CD44-CD24+	2	2	1
Her2	T1A	Lung	621K8(8q)	CD44+CD24-	5	2	2.5		TNBC	TNBC1_PR	621K8(8q)	CD44-CD24+	2	2	1
Her2	T1A	Lung	621K8(8q)	CD44+CD24-	6	2	3		TNBC	TNBC1_PR	621K8(8q)	CD44-CD24+	1	2	0.5
Her2	T1A	Lung	621K8(8q)	CD44+CD24-	2	1	2		TNBC	TNBC1_PR	621K8(8q)	CD44-CD24+	2	2	1
Her2	T1A	Lung	621K8(8q)	CD44+CD24-	3	2	1.5		TNBC	TNBC1_PR	621K8(8q)	CD44-CD24+	1	2	0.5
Her2	T1A	Lung	621K8(8q)	CD44+CD24-	1	2	0.5		TNBC	TNBC1_PR	621K8(8q)	CD44-CD24+	3	2	1.5
Her2	T1A	Lung	621K8(8q)	CD44+CD24-	6	4	1.5		TNBC	TNBC1_PR	621K8(8q)	CD44-CD24+	1	1	1
Her2	T1A	Lung	621K8(8q)	CD44+CD24-	2	2	1		TNBC	TNBC1_PR	621K8(8q)	CD44-CD24+	2	1	2
Her2	T1A	Lung	621K8(8q)	CD44+CD24-	2	1	2		TNBC	TNBC1_PR	621K8(8q)	CD44-CD24+	1	1	1
Her2	T1A	Lung	621K8(8q)	CD44+CD24-	6	2	3		TNBC	TNBC1_PR	621K8(8q)	CD44-CD24+	1	2	0.5
Her2	T1A	Lung	621K8(8q)	CD44+CD24-	2	1	2		TNBC	TNBC1_PR	621K8(8q)	CD44-CD24+	0	1	0
Her2	T1A	Lung	621K8(8q)	CD44+CD24-	7	4	1.75		TNBC	TNBC1_PR	621K8(8q)	CD44-CD24+	1	1	1
Her2	T1A	Lung	621K8(8q)	CD44+CD24-	5	1	5		TNBC	TNBC1_PR	621K8(8q)	CD44-CD24+	1	2	0.5
Her2	T1A	Lung	621K8(8q)	CD44+CD24-	1	2	0.5		TNBC	TNBC1_PR	621K8(8q)	CD44-CD24+	1	3	0.333333
Her2	T1A	Lung	621K8(8q)	CD44+CD24-	6	4	1.5		TNBC	TNBC1_PR	621K8(8q)	CD44-CD24+	1	1	1
Her2	T1A	Lung	621K8(8q)	CD44+CD24-	9	2	4.5		TNBC	TNBC1_PR	621K8(8q)	CD44-CD24+	2	2	1
Her2	T1A	Lung	621K8(8q)	CD44+CD24-	3	1	3		TNBC	TNBC1_PR	621K8(8q)	CD44-CD24+	2	2	1
Her2	T1A	Lung	621K8(8q)	CD44+CD24-	6	4	1.5		TNBC	TNBC1_PR	621K8(8q)	CD44-CD24+	1	1	1
Her2	T1A	Lung	621K8(8q)	CD44+CD24-	1	1	1		TNBC	TNBC1_PR	621K8(8q)	CD44-CD24+	1	1	1
Her2	T1A	Lung	621K8(8q)	CD44+CD24-	5	3	1.66667		TNBC	TNBC1_PR	621K8(8q)	CD44-CD24+	1	2	0.5
Her2	T1A	Lung	621K8(8q)	CD44+CD24-	1	2	0.5		TNBC	TNBC1_PR	621K8(8q)	CD44-CD24+	1	1	1
Her2	T1A	Lung	621K8(8q)	CD44+CD24-	3	3	1		TNBC	TNBC1_PR	621K8(8q)	CD44-CD24+	1	1	1
Her2	T1A	Lung	621K8(8q)	CD44+CD24-	3	1	3		TNBC	TNBC1_PR	621K8(8q)	CD44-CD24+	0	1	0
Her2	T1A	Lung	621K8(8q)	CD44+CD24-	3	1	3		TNBC	TNBC1_PR	621K8(8q)	CD44-CD24+	3	1	3
Her2	T1A	Lung	621K8(8q)	CD44+CD24-	1	1	1		TNBC	TNBC1_PR	621K8(8q)	CD44-CD24+	2	2	1
Her2	T1A	Lung	621K8(8q)	CD44+CD24-	6	1	6		TNBC	TNBC1_PR	621K8(8q)	CD44-CD24+	1	2	0.5
Her2	T1A	Lung	621K8(8q)	CD44+CD24-	7	3	2.33333		TNBC	TNBC1_PR	621K8(8q)	CD44-CD24+	1	2	0.5
Her2	T1A	Lung	621K8(8q)	CD44+CD24-	3	3	1		TNBC	TNBC1_PR	621K8(8q)	CD44-CD24+	2	2	1
Her2	T1A	Lung	621K8(8q)	CD44+CD24-	2	2	1		TNBC	TNBC1_PR	621K8(8q)	CD44-CD24+	2	2	1
Her2	T1A	Lung	621K8(8q)	CD44+CD24-	6	3	2		TNBC	TNBC1_PR	621K8(8q)	CD44-CD24+	2	2	1
Her2	T1A	Lung	621K8(8q)	CD44+CD24-	4	2	2		TNBC	TNBC1_PR	621K8(8q)	CD44-CD24+	3	3	1
Her2	T1A	Lung	621K8(8q)	CD44+CD24-	1	1	1		TNBC	TNBC1_PR	621K8(8q)	CD44-CD24+	2	2	1
Her2	T1A	Lung	621K8(8q)	CD44+CD24-	7	4	1.75		TNBC	TNBC1_PR	621K8(8q)	CD44-CD24+	3	2	1.5
Her2	T1A	Lung	621K8(8q)	CD44+CD24-	5	2	2.5		TNBC	TNBC1_PR	621K8(8q)	CD44-CD24+	1	1	1
Her2	T1A	Lung	621K8(8q)	CD44+CD24-	5	3	1.66667		TNBC	TNBC1_PR	621K8(8q)	CD44-CD24+	1	1	1
Her2	T1A	Lung	621K8(8q)	CD44+CD24-	6	2	3		TNBC	TNBC1_PR	621K8(8q)	CD44-CD24+	2	2	1
Her2	T1A	Lung	621K8(8q)	CD44+CD24-	2	1	2		TNBC	TNBC1_PR	621K8(8q)	CD44-CD24+	2	1	2
Her2	T1A	Lung	621K8(8q)	CD44+CD24-	5	1	5		TNBC	TNBC1_PR	621K8(8q)	CD44-CD24+	2	2	1
Her2	T1A	Lung	621K8(8q)	CD44+CD24-	1	1	1		TNBC	TNBC1_PR	621K8(8q)	CD44-CD24+	1	1	1
Her2	T1A	Lung	621K8(8q)	CD44+CD24-	5	2	2.5		TNBC	TNBC1_PR	621K8(8q)	CD44-CD24+	2	2	1
Her2	T1A	Lung	621K8(8q)	CD44+CD24-	5	2	2.5		TNBC	TNBC1_PR	621K8(8q)	CD44-CD24+	3	2	1.5
Her2	T1A	Lung	621K8(8q)	CD44+CD24-	4	1	4		TNBC	TNBC1_PR	621K8(8q)	CD44-CD24+	1	1	1
Her2	T1A	Lung	621K8(8q)	CD44+CD24-	6	2	3		TNBC	TNBC1_PR	621K8(8q)	CD44-CD24+	1	1	1
Her2	T1A	Lung	621K8(8q)	CD44+CD24-	3	3	1		TNBC	TNBC1_PR	621K8(8q)	CD44-CD24+	3	2	1.5
Her2	T1A	Lung	621K8(8q)	CD44+CD24-	4	2	2		TNBC	TNBC1_PR	621K8(8q)	CD44-CD24+	2	2	1
Her2	T1A	Lung	621K8(8q)	CD44+CD24-	7	6	1.16667		TNBC	TNBC1_PR	621K8(8q)	CD44-CD24+	3	3	1
Her2	T1A	Lung	621K8(8q)	CD44+CD24-	2	1	2		TNBC	TNBC1_PR	621K8(8q)	CD44-CD24+	2	2	1
Her2	T1A	Lung	621K8(8q)	CD44+CD24-	3	1	3		TNBC	TNBC1_PR	621K8(8q)	CD44-CD24+	2	3	0.666667
Her2	T1A	Lung	621K8(8q)	CD44+CD24-	5	2	2.5		TNBC	TNBC1_PR	621K8(8q)	CD44-CD24+	2	2	1
Her2	T1A	Lung	621K8(8q)	CD44+CD24-	2	2	1		TNBC	TNBC1_PR	621K8(8q)	CD44-CD24+	1	1	1
Her2	T1A	Lung	621K8(8q)	CD44+CD24+	4	1	4		TNBC	TNBC1_PR	621K8(8q)	CD44-CD24+	1	1	1
Her2	T1A	Lung	621K8(8q)	CD44+CD24+	9	4	2.25		TNBC	TNBC1_PR	621K8(8q)	CD44-CD24+	2	1	2
Her2	T1A	Lung	621K8(8q)	CD44+CD24+	1	6	0.166667		TNBC	TNBC1_PR	621K8(8q)	CD44-CD24+	1	1	1
Her2	T1A	Lung	621K8(8q)	CD44+CD24+	6	3	2		TNBC	TNBC1_PR	621K8(8q)	CD44-CD24+	1	1	1
Her2	T1A	Lung	621K8(8q)	CD44+CD24+	2	2	1		TNBC	TNBC1_PR	621K8(8q)	CD44-CD24+	1	1	1
Her2	T1A	Lung	621K8(8q)	CD44+CD24+	4	4	1		TNBC	TNBC1_PR	621K8(8q)	CD44-CD24+	1	1	1
Her2	T1A	Lung	621K8(8q)	CD44+CD24+	3	2	1.5		TNBC	TNBC1_PR	621K8(8q)	CD44-CD24+	2	2	1
Her2	T1A	Lung	621K8(8q)	CD44+CD24+	4	4	1		TNBC	TNBC1_PR	621K8(8q)	CD44-CD24+	2	2	1
Her2	T1A	Lung	621K8(8q)	CD44+CD24+	2	2	1		TNBC	TNBC1_PR	621K8(8q)	CD44-CD24+	2	1	2
Her2	T1A	Lung	621K8(8q)	CD44+CD24+	4	3	1.33333		TNBC	TNBC1_PR	621K8(8q)	CD44-CD24+	1	1	1
Her2	T1A	Lung	621K8(8q)	CD44+CD24+	8	2	4		TNBC	TNBC1_PR	621K8(8q)	CD44-CD24+	2	1	2
Her2	T1A	Lung	621K8(8q)	CD44+CD24+	2	2	1		TNBC	TNBC1_PR	621K8(8q)	CD44-CD24+	1	1	1
Her2	T1A	Lung	621K8(8q)	CD44+CD24+	4	2	2		TNBC	TNBC1_PR	621K8(8q)	CD44-CD24+	1	1	1
Her2	T1A	Lung	621K8(8q)	CD44+CD24+	7	4	1.75		TNBC	TNBC1_PR	621K8(8q)	CD44-CD24+	2	1	2
Her2	T1A	Lung	621K8(8q)	CD44+CD24+	2	2	1		TNBC	TNBC1_PR	621K8(8q)	CD44-CD24+	2	2	1
Her2	T1A	Lung	621K8(8q)	CD44+CD24+	4	2	2		TNBC	TNBC1_PR	621K8(8q)	CD44-CD24+	1	2	0.5
Her2	T1A	Lung	621K8(8q)	CD44+CD24+	4	2	2		TNBC	TNBC1_PR	621K8(8q)	CD44-CD24+	1	1	1
Her2	T1A	Lung	621K8(8q)	CD44+CD24+	2	1	2		TNBC	TNBC1_PR	621K8(8q)	CD44-CD24+	1	2	0.5
Her2	T1A	Lung	621K8(8q)	CD44+CD24+	5	3	1.66667		TNBC	TNBC1_PR	621K8(8q)	CD44-CD24+	1	1	1
Her2	T1A	Lung	621K8(8q)	CD44+CD24+	6	4	1.5		TNBC	TNBC1_PR	621K8(8q)	CD44-CD24+	1	1	1
Her2	T1A	Lung	621K8(8q)	CD44+CD24+	5	3	1.66667		TNBC	TNBC1_PR	621K8(8q)	CD44-CD24+	0	1	0
Her2	T1A	Lung	621K8(8q)	CD44+CD24+	6	4	1.5		TNBC	TNBC1_PR	621K8(8q)	CD44-CD24+	1	1	1
Her2	T1A	Lung	621K8(8q)	CD44+CD24+	2	2	1		TNBC	TNBC1_PR	621K8(8q)	CD44-CD24+	1	1	1
Her2	T1A	Lung	621K8(8q)	CD44+CD24+	6	2	3		TNBC	TNBC1_PR	621K8(8q)	CD44-CD24+	1	1	1
Her2	T1A	Lung	621K8(8q)	CD44+CD24+	1	2	0.5		TNBC	TNBC1_PR	621K8(8q)	CD44-CD24+	2	2	1
Her2	T1A	Lung	621K8(8q)	CD44+CD24+	10	4	2.5		TNBC	TNBC1_PR	621K8(8q)	CD44-CD24+	1	1	1
Her2	T1A	Lung	621K8(8q)	CD44+CD24+	8	5	1.6		TNBC	TNBC1_PR	621K8(8q)	CD44-CD24+	4	1	4
Her2	T1A	Lung	621K8(8q)	CD44+CD24+	7	3	2.33333		TNBC	TNBC1_PR	621K8(8q)	CD44-CD24+	1	1	1
Her2	T1A	Lung	621K8(8q)	CD44+CD24+	4	4	1		TNBC	TNBC1_PR	621K8(8q)	CD44-CD24+	0	1	0
Her2	T1A	Lung	621K8(8q)	CD44+CD24+	2	5	0.4		TNBC	TNBC1_PR	621K8(8q)	CD44-CD24+	1	1	1
Her2	T1A	Lung	621K8(8q)	CD44+CD24+	7	4	1.75		TNBC	TNBC1_PR	621K8(8q)	CD44-CD24-	1	1	1
Her2	T1A	Lung	621K8(8q)	CD44+CD24+	4	3	1.33333		TNBC	TNBC1_PR	621K8(8q)	CD44-CD24-	1	2	0.5
Her2	T1A	Lung	621K8(8q)	CD44+CD24+	3	3	1		TNBC	TNBC1_PR	621K8(8q)	CD44-CD24-	2	1	2
Her2	T1A	Lung	621K8(8q)	CD44+CD24+	5	3	1.66667		TNBC	TNBC1_PR	621K8(8q)	CD44-CD24-	1	1	1
Her2	T1A	Lung	621K8(8q)	CD44+CD24+	4	2	2		TNBC	TNBC1_PR	621K8(8q)	CD44-CD24-	3	1	3
Her2	T1A	Lung	621K8(8q)	CD44+CD24+	9	6	1.5		TNBC	TNBC1_PR	621K8(8q)	CD44-CD24-	3	1	3
Her2	T1A	Lung	621K8(8q)	CD44+CD24+	6	2	3		TNBC	TNBC1_PR	621K8(8q)	CD44-CD24-	1	1	1
Her2	T1A	Lung	621K8(8q)	CD44+CD24+	7	3	2.33333		TNBC	TNBC1_PR	621K8(8q)	CD44-CD24-	1	1	1
Her2	T1A	Lung	621K8(8q)	CD44+CD24+	6	4	1.5		TNBC	TNBC1_PR	621K8(8q)	CD44-CD24-	1	2	0.5
Her2	T1A	Lung	621K8(8q)	CD44+CD24+	4	3	1.33333		TNBC	TNBC1_PR	621K8(8q)	CD44-CD24-	1	2	0.5
Her2	T1A	Lung	621K8(8q)	CD44+CD24+	6	4	1.5		TNBC	TNBC1_PR	621K8(8q)	CD44-CD24-	1	1	1
Her2	T1A	Lung	621K8(8q)	CD44+CD24+	6	3	2		TNBC	TNBC1_PR	621K8(8q)	CD44-CD24-	1	2	0.5
Her2	T1A	Lung	621K8(8q)	CD44+CD24+	6	3	2		TNBC	TNBC1_PR	621K8(8q)	CD44-CD24-	2	2	1
Her2	T1A	Lung	621K8(8q)	CD44+CD24+	12	5	2.4		TNBC	TNBC1_PR	621K8(8q)	CD44-CD24-	1	1	1
Her2	T1A	Lung	621K8(8q)	CD44+CD24+	6	3	2		TNBC	TNBC1_PR	621K8(8q)	CD44-CD24-	1	2	0.5
Her2	T1A	Lung	621K8(8q)	CD44+CD24+	7	2	3.5		TNBC	TNBC1_PR	621K8(8q)	CD44-CD24-	1	1	1
Her2	T1A	Lung	621K8(8q)	CD44+CD24+	8	2	4		TNBC	TNBC1_PR	621K8(8q)	CD44-CD24-	1	1	1
Her2	T1A	Lung	621K8(8q)	CD44+CD24+	8	4	2		TNBC	TNBC1_PR	621K8(8q)	CD44-CD24-	0	1	0
Her2	T1A	Lung	621K8(8q)	CD44+CD24+	3	4	0.75		TNBC	TNBC1_PR	621K8(8q)	CD44-CD24-	2	1	2
Her2	T1A	Lung	621K8(8q)	CD44+CD24+	11	4	2.75		TNBC	TNBC1_PR	621K8(8q)	CD44-CD24-	1	1	1
Her2	T1A	Lung	621K8(8q)	CD44+CD24+	3	2	1.5		TNBC	TNBC1_PR	621K8(8q)	CD44-CD24-	1	1	1
Her2	T1A	Lung	621K8(8q)	CD44+CD24+	9	3	3		TNBC	TNBC1_PR	621K8(8q)	CD44-CD24-	2	2	1
Her2	T1A	Lung	621K8(8q)	CD44+CD24+	4	3	1.33333		TNBC	TNBC1_PR	621K8(8q)	CD44-CD24-	0	1	0
Her2	T1A	Lung	621K8(8q)	CD44+CD24+	6	3	2		TNBC	TNBC1_PR	621K8(8q)	CD44-CD24-	1	1	1
Her2	T1A	Lung	621K8(8q)	CD44+CD24+	2	3	0.666667		TNBC	TNBC1_PR	621K8(8q)	CD44-CD24-	1	1	1
Her2	T1A	Lung	621K8(8q)	CD44+CD24+	7	2	3.5		TNBC	TNBC1_PR	621K8(8q)	CD44-CD24-	2	2	1
Her2	T1A	Lung	621K8(8q)	CD44+CD24+	2	2	1		TNBC	TNBC1_PR	621K8(8q)	CD44-CD24-	1	1	1
Her2	T1A	Lung	621K8(8q)	CD44+CD24+	3	1	3		TNBC	TNBC1_PR	621K8(8q)	CD44-CD24-	1	1	1
Her2	T1A	Lung	621K8(8q)	CD44+CD24+	10	4	2.5		TNBC	TNBC1_PR	621K8(8q)	CD44-CD24-	1	1	1
Her2	T1A	Lung	621K8(8q)	CD44+CD24+	6	3	2		TNBC	TNBC1_PR	621K8(8q)	CD44-CD24-	1	1	1
Her2	T1A	Lung	621K8(8q)	CD44+CD24+	4	1	4		TNBC	TNBC1_PR	621K8(8q)	CD44-CD24-	1	1	1
Her2	T1A	Lung	621K8(8q)	CD44+CD24+	1	1	1		TNBC	TNBC1_PR	621K8(8q)	CD44-CD24-	1	1	1
Her2	T1A	Lung	621K8(8q)	CD44+CD24+	6	2	3		TNBC	TNBC1_PR	621K8(8q)	CD44-CD24-	2	1	2
Her2	T1A	Lung	621K8(8q)	CD44+CD24+	6	2	3		TNBC	TNBC1_PR	621K8(8q)	CD44-CD24-	1	1	1
Her2	T1A	Lung	621K8(8q)	CD44+CD24+	2	1	2		TNBC	TNBC1_PR	621K8(8q)	CD44-CD24-	0	2	0
Her2	T1A	Lung	621K8(8q)	CD44+CD24+	2	2	1		TNBC	TNBC1_PR	621K8(8q)	CD44-CD24-	2	2	1
Her2	T1A	Lung	621K8(8q)	CD44+CD24+	2	1	2		TNBC	TNBC1_PR	621K8(8q)	CD44-CD24-	1	1	1
Her2	T1A	Lung	621K8(8q)	CD44+CD24+	7	2	3.5		TNBC	TNBC1_PR	621K8(8q)	CD44-CD24-	1	1	1
Her2	T1A	Lung	621K8(8q)	CD44+CD24+	5	4	1.25		TNBC	TNBC1_PR	621K8(8q)	CD44-CD24-	1	1	1
Her2	T1A	Lung	621K8(8q)	CD44+CD24+	5	1	5		TNBC	TNBC1_PR	621K8(8q)	CD44-CD24-	1	1	1
Her2	T1A	Lung	621K8(8q)	CD44+CD24+	10	4	2.5		TNBC	TNBC1_PR	621K8(8q)	CD44-CD24-	2	2	1
Her2	T1A	Lung	621K8(8q)	CD44+CD24+	2	2	1		TNBC	TNBC1_PR	621K8(8q)	CD44-CD24-	3	2	1.5
Her2	T1A	Lung	621K8(8q)	CD44+CD24+	5	2	2.5		TNBC	TNBC1_PR	621K8(8q)	CD44-CD24-	1	2	0.5
Her2	T1A	Lung	621K8(8q)	CD44+CD24+	5	3	1.66667		TNBC	TNBC1_PR	621K8(8q)	CD44-CD24-	1	2	0.5
Her2	T1A	Lung	621K8(8q)	CD44+CD24+	2	2	1		TNBC	TNBC1_PR	621K8(8q)	CD44-CD24-	1	2	0.5
Her2	T1A	Lung	621K8(8q)	CD44+CD24+	5	3	1.66667		TNBC	TNBC1_PR	621K8(8q)	CD44-CD24-	2	2	1
Her2	T1A	Lung	621K8(8q)	CD44+CD24+	3	2	1.5		TNBC	TNBC1_PR	621K8(8q)	CD44-CD24-	1	1	1
Her2	T1A	Lung	621K8(8q)	CD44+CD24+	6	3	2		TNBC	TNBC1_PR	621K8(8q)	CD44-CD24-	1	1	1
Her2	T1A	Lung	621K8(8q)	CD44+CD24+	1	1	1		TNBC	TNBC1_PR	621K8(8q)	CD44-CD24-	2	2	1
Her2	T1A	Lung	621K8(8q)	CD44+CD24+	4	2	2		TNBC	TNBC1_PR	621K8(8q)	CD44-CD24-	1	1	1
Her2	T1A	Lung	621K8(8q)	CD44+CD24+	2	1	2		TNBC	TNBC1_PR	621K8(8q)	CD44-CD24-	0	1	0
Her2	T1A	Lung	621K8(8q)	CD44+CD24+	6	4	1.5		TNBC	TNBC1_PR	621K8(8q)	CD44-CD24-	1	1	1
Her2	T1A	Lung	621K8(8q)	CD44+CD24+	10	3	3.33333		TNBC	TNBC1_PR	621K8(8q)	CD44-CD24-	1	1	1
Her2	T1A	Lung	621K8(8q)	CD44+CD24+	6	3	2		TNBC	TNBC1_PR	621K8(8q)	CD44-CD24-	1	1	1
Her2	T1A	Lung	621K8(8q)	CD44+CD24+	5	2	2.5		TNBC	TNBC1_PR	621K8(8q)	CD44-CD24-	0	1	0
Her2	T1A	Lung	621K8(8q)	CD44+CD24+	2	1	2		TNBC	TNBC1_PR	621K8(8q)	CD44-CD24-	1	1	1
Her2	T1A	Lung	621K8(8q)	CD44+CD24+	5	1	5		TNBC	TNBC1_PR	621K8(8q)	CD44-CD24-	1	1	1
Her2	T1A	Lung	621K8(8q)	CD44+CD24+	7	1	7		TNBC	TNBC1_PR	621K8(8q)	CD44-CD24-	1	2	0.5
Her2	T1A	Lung	621K8(8q)	CD44+CD24+	5	4	1.25		TNBC	TNBC1_PR	621K8(8q)	CD44-CD24-	1	1	1
Her2	T1A	Lung	621K8(8q)	CD44+CD24+	3	2	1.5		TNBC	TNBC1_PR	621K8(8q)	CD44-CD24-	1	1	1
Her2	T1A	Lung	621K8(8q)	CD44+CD24+	5	3	1.66667		TNBC	TNBC1_PR	621K8(8q)	CD44-CD24-	1	1	1
Her2	T1A	Lung	621K8(8q)	CD44+CD24+	2	2	1		TNBC	TNBC1_PR	621K8(8q)	CD44-CD24-	1	1	1
Her2	T1A	Lung	621K8(8q)	CD44+CD24+	8	3	2.66667		TNBC	TNBC1_PR	621K8(8q)	CD44-CD24-	1	1	1
Her2	T1A	Lung	621K8(8q)	CD44+CD24+	5	3	1.66667		TNBC	TNBC1_PR	621K8(8q)	CD44-CD24-	0	1	0
Her2	T1A	Lung	621K8(8q)	CD44+CD24+	9	3	3		TNBC	TNBC1_PR	621K8(8q)	CD44-CD24-	2	2	1
Her2	T1A	Lung	621K8(8q)	CD44+CD24+	6	3	2		TNBC	TNBC1_PR	621K8(8q)	CD44-CD24-	1	2	0.5
Her2	T1A	Lung	621K8(8q)	CD44+CD24+	6	3	2		TNBC	TNBC1_PR	621K8(8q)	CD44-CD24-	1	1	1
Her2	T1A	Lung	621K8(8q)	CD44+CD24+	5	4	1.25		TNBC	TNBC1_PR	621K8(8q)	CD44-CD24-	2	1	2
Her2	T1A	Lung	621K8(8q)	CD44+CD24+	7	1	7		TNBC	TNBC1_PR	621K8(8q)	CD44-CD24-	2	2	1
Her2	T1A	Lung	621K8(8q)	CD44+CD24+	3	2	1.5		TNBC	TNBC1_PR	621K8(8q)	CD44-CD24-	1	1	1
Her2	T1A	Lung	621K8(8q)	CD44-CD24+	9	2	4.5		TNBC	TNBC1_PR	621K8(8q)	CD44-CD24-	2	2	1
Her2	T1A	Lung	621K8(8q)	CD44-CD24+	7	3	2.33333		TNBC	TNBC1_PR	621K8(8q)	CD44-CD24-	2	2	1
Her2	T1A	Lung	621K8(8q)	CD44-CD24+	6	3	2		TNBC	TNBC1_PR	621K8(8q)	CD44-CD24-	1	1	1
Her2	T1A	Lung	621K8(8q)	CD44-CD24+	3	2	1.5		TNBC	TNBC1_PR	621K8(8q)	CD44-CD24-	1	1	1
Her2	T1A	Lung	621K8(8q)	CD44-CD24+	3	1	3		TNBC	TNBC1_PR	621K8(8q)	CD44-CD24-	1	1	1
Her2	T1A	Lung	621K8(8q)	CD44-CD24+	6	4	1.5		TNBC	TNBC1_PR	621K8(8q)	CD44-CD24-	2	1	2
Her2	T1A	Lung	621K8(8q)	CD44-CD24+	3	2	1.5		TNBC	TNBC1_PR	621K8(8q)	CD44-CD24-	2	1	2
Her2	T1A	Lung	621K8(8q)	CD44-CD24+	8	4	2		TNBC	TNBC1_PR	621K8(8q)	CD44-CD24-	2	2	1
Her2	T1A	Lung	621K8(8q)	CD44-CD24+	3	1	3		TNBC	TNBC1_PR	621K8(8q)	CD44-CD24-	2	2	1
Her2	T1A	Lung	621K8(8q)	CD44-CD24+	7	3	2.33333		TNBC	TNBC1_PR	621K8(8q)	CD44-CD24-	0	1	0
Her2	T1A	Lung	621K8(8q)	CD44-CD24+	7	2	3.5		TNBC	TNBC1_PR	621K8(8q)	CD44-CD24-	1	1	1
Her2	T1A	Lung	621K8(8q)	CD44-CD24+	5	2	2.5		TNBC	TNBC1_PR	621K8(8q)	CD44-CD24-	1	1	1
Her2	T1A	Lung	621K8(8q)	CD44-CD24+	4	3	1.33333		TNBC	TNBC1_PR	621K8(8q)	CD44-CD24-	1	1	1
Her2	T1A	Lung	621K8(8q)	CD44-CD24+	1	2	0.5		TNBC	TNBC1_PR	621K8(8q)	CD44-CD24-	3	1	3
Her2	T1A	Lung	621K8(8q)	CD44-CD24+	8	2	4		TNBC	TNBC1_PR	621K8(8q)	CD44-CD24-	2	2	1
Her2	T1A	Lung	621K8(8q)	CD44-CD24+	5	3	1.66667		TNBC	TNBC1_PR	621K8(8q)	CD44-CD24-	1	1	1
Her2	T1A	Lung	621K8(8q)	CD44-CD24+	2	1	2		TNBC	TNBC1_PR	621K8(8q)	CD44-CD24-	2	1	2
Her2	T1A	Lung	621K8(8q)	CD44-CD24+	5	2	2.5		TNBC	TNBC1_PR	621K8(8q)	CD44-CD24-	1	2	0.5
Her2	T1A	Lung	621K8(8q)	CD44-CD24+	7	4	1.75		TNBC	TNBC1_PR	621K8(8q)	CD44-CD24-	2	1	2
Her2	T1A	Lung	621K8(8q)	CD44-CD24+	7	2	3.5		TNBC	TNBC1_PR	621K8(8q)	CD44-CD24-	2	2	1
Her2	T1A	Lung	621K8(8q)	CD44-CD24+	2	1	2		TNBC	TNBC1_PR	621K8(8q)	CD44-CD24-	2	2	1
Her2	T1A	Lung	621K8(8q)	CD44-CD24+	13	8	1.625		TNBC	TNBC1_PR	621K8(8q)	CD44-CD24-	1	1	1
Her2	T1A	Lung	621K8(8q)	CD44-CD24+	5	3	1.66667		TNBC	TNBC1_PR	621K8(8q)	CD44-CD24-	1	1	1
Her2	T1A	Lung	621K8(8q)	CD44-CD24+	8	3	2.66667		TNBC	TNBC1_PR	621K8(8q)	CD44-CD24-	2	2	1
Her2	T1A	Lung	621K8(8q)	CD44-CD24+	7	4	1.75		TNBC	TNBC1_PR	621K8(8q)	CD44-CD24-	1	1	1
Her2	T1A	Lung	621K8(8q)	CD44-CD24+	1	2	0.5		TNBC	TNBC1_PR	621K8(8q)	CD44-CD24-	1	1	1
Her2	T1A	Lung	621K8(8q)	CD44-CD24+	5	1	5		TNBC	TNBC1_PR	621K8(8q)	CD44-CD24-	2	2	1
Her2	T1A	Lung	621K8(8q)	CD44-CD24+	3	2	1.5		TNBC	TNBC1_PR	621K8(8q)	CD44-CD24-	0	1	0
Her2	T1A	Lung	621K8(8q)	CD44-CD24+	3	2	1.5		TNBC	TNBC1_PR	621K8(8q)	CD44-CD24-	1	1	1
Her2	T1A	Lung	621K8(8q)	CD44-CD24+	5	2	2.5		TNBC	TNBC1_PR	621K8(8q)	CD44-CD24-	1	1	1
Her2	T1A	Lung	621K8(8q)	CD44-CD24+	6	4	1.5		TNBC	TNBC1_LN	H2AFJ(12p)	CD44-CD24+	2	2	1
Her2	T1A	Lung	621K8(8q)	CD44-CD24+	1	1	1		TNBC	TNBC1_LN	H2AFJ(12p)	CD44-CD24+	2	2	1
Her2	T1A	Lung	621K8(8q)	CD44-CD24+	1	2	0.5		TNBC	TNBC1_LN	H2AFJ(12p)	CD44-CD24+	1	1	1
Her2	T1A	Lung	621K8(8q)	CD44-CD24+	6	4	1.5		TNBC	TNBC1_LN	H2AFJ(12p)	CD44-CD24+	2	2	1
Her2	T1A	Lung	621K8(8q)	CD44-CD24+	1	1	1		TNBC	TNBC1_LN	H2AFJ(12p)	CD44-CD24+	1	1	1
Her2	T1A	Lung	621K8(8q)	CD44-CD24+	7	3	2.33333		TNBC	TNBC1_LN	H2AFJ(12p)	CD44-CD24+	1	1	1
Her2	T1A	Lung	621K8(8q)	CD44-CD24+	7	5	1.4		TNBC	TNBC1_LN	H2AFJ(12p)	CD44-CD24+	1	1	1
Her2	T1A	Lung	621K8(8q)	CD44-CD24+	3	2	1.5		TNBC	TNBC1_LN	H2AFJ(12p)	CD44-CD24+	1	1	1
Her2	T1A	Lung	621K8(8q)	CD44-CD24+	4	2	2		TNBC	TNBC1_LN	H2AFJ(12p)	CD44-CD24+	2	2	1
Her2	T1A	Lung	621K8(8q)	CD44-CD24+	4	3	1.33333		TNBC	TNBC1_LN	H2AFJ(12p)	CD44-CD24+	1	1	1
Her2	T1A	Lung	621K8(8q)	CD44-CD24+	5	4	1.25		TNBC	TNBC1_LN	H2AFJ(12p)	CD44-CD24+	1	1	1
Her2	T1A	Lung	621K8(8q)	CD44-CD24+	3	2	1.5		TNBC	TNBC1_LN	H2AFJ(12p)	CD44-CD24+	1	1	1
Her2	T1A	Lung	621K8(8q)	CD44-CD24+	4	2	2		TNBC	TNBC1_LN	H2AFJ(12p)	CD44-CD24+	1	1	1
Her2	T1A	Lung	621K8(8q)	CD44-CD24+	2	2	1		TNBC	TNBC1_LN	H2AFJ(12p)	CD44-CD24+	2	2	1
Her2	T1A	Lung	621K8(8q)	CD44-CD24+	5	2	2.5		TNBC	TNBC1_LN	H2AFJ(12p)	CD44-CD24+	1	1	1
Her2	T1A	Lung	621K8(8q)	CD44-CD24+	1	1	1		TNBC	TNBC1_LN	H2AFJ(12p)	CD44-CD24+	1	1	1
Her2	T1A	Lung	621K8(8q)	CD44-CD24+	5	3	1.66667		TNBC	TNBC1_LN	H2AFJ(12p)	CD44-CD24+	1	1	1
Her2	T1A	Lung	621K8(8q)	CD44-CD24+	2	1	2		TNBC	TNBC1_LN	H2AFJ(12p)	CD44-CD24+	2	1	2
Her2	T1A	Lung	621K8(8q)	CD44-CD24+	1	2	0.5		TNBC	TNBC1_LN	H2AFJ(12p)	CD44-CD24+	1	1	1
Her2	T1A	Lung	621K8(8q)	CD44-CD24+	5	4	1.25		TNBC	TNBC1_LN	H2AFJ(12p)	CD44-CD24+	1	1	1
Her2	T1A	Lung	621K8(8q)	CD44-CD24+	2	1	2		TNBC	TNBC1_LN	H2AFJ(12p)	CD44-CD24+	2	2	1
Her2	T1A	Lung	621K8(8q)	CD44-CD24+	7	4	1.75		TNBC	TNBC1_LN	H2AFJ(12p)	CD44-CD24+	1	1	1
Her2	T1A	Lung	621K8(8q)	CD44-CD24+	3	3	1		TNBC	TNBC1_LN	H2AFJ(12p)	CD44-CD24+	1	2	0.5
Her2	T1A	Lung	621K8(8q)	CD44-CD24+	1	1	1		TNBC	TNBC1_LN	H2AFJ(12p)	CD44-CD24+	2	2	1
Her2	T1A	Lung	621K8(8q)	CD44-CD24+	1	1	1		TNBC	TNBC1_LN	H2AFJ(12p)	CD44-CD24+	2	2	1
Her2	T1A	Lung	621K8(8q)	CD44-CD24+	1	1	1		TNBC	TNBC1_LN	H2AFJ(12p)	CD44-CD24+	3	1	3
Her2	T1A	Lung	621K8(8q)	CD44-CD24+	1	1	1		TNBC	TNBC1_LN	H2AFJ(12p)	CD44-CD24+	2	2	1
Her2	T1A	Lung	621K8(8q)	CD44-CD24+	3	3	1		TNBC	TNBC1_LN	H2AFJ(12p)	CD44-CD24+	2	2	1
Her2	T1A	Lung	621K8(8q)	CD44-CD24+	2	1	2		TNBC	TNBC1_LN	H2AFJ(12p)	CD44-CD24+	2	2	1
Her2	T1A	Lung	621K8(8q)	CD44-CD24+	7	5	1.4		TNBC	TNBC1_LN	H2AFJ(12p)	CD44-CD24+	1	1	1
Her2	T1A	Lung	621K8(8q)	CD44-CD24+	3	2	1.5		TNBC	TNBC1_LN	H2AFJ(12p)	CD44-CD24+	1	1	1
Her2	T1A	Lung	621K8(8q)	CD44-CD24+	2	1	2		TNBC	TNBC1_LN	H2AFJ(12p)	CD44-CD24+	2	2	1
Her2	T1A	Lung	621K8(8q)	CD44-CD24+	3	3	1		TNBC	TNBC1_LN	H2AFJ(12p)	CD44-CD24+	2	2	1
Her2	T1A	Lung	621K8(8q)	CD44-CD24+	5	3	1.66667		TNBC	TNBC1_LN	H2AFJ(12p)	CD44-CD24+	1	1	1
Her2	T1A	Lung	621K8(8q)	CD44-CD24+	2	1	2		TNBC	TNBC1_LN	H2AFJ(12p)	CD44-CD24+	2	1	2
Her2	T1A	Lung	621K8(8q)	CD44-CD24+	1	1	1		TNBC	TNBC1_LN	H2AFJ(12p)	CD44-CD24+	1	1	1
Her2	T1A	Lung	621K8(8q)	CD44-CD24+	1	1	1		TNBC	TNBC1_LN	H2AFJ(12p)	CD44-CD24+	1	1	1
Her2	T1A	Lung	621K8(8q)	CD44-CD24+	1	1	1		TNBC	TNBC1_LN	H2AFJ(12p)	CD44-CD24+	2	2	1
Her2	T1A	Lung	621K8(8q)	CD44-CD24+	8	5	1.6		TNBC	TNBC1_LN	H2AFJ(12p)	CD44-CD24+	2	2	1
Her2	T1A	Lung	621K8(8q)	CD44-CD24+	1	1	1		TNBC	TNBC1_LN	H2AFJ(12p)	CD44-CD24+	1	1	1
Her2	T1A	Lung	621K8(8q)	CD44-CD24+	3	2	1.5		TNBC	TNBC1_LN	H2AFJ(12p)	CD44-CD24+	2	2	1
Her2	T1A	Lung	621K8(8q)	CD44-CD24+	3	3	1		TNBC	TNBC1_LN	H2AFJ(12p)	CD44-CD24+	2	2	1
Her2	T1A	Lung	621K8(8q)	CD44-CD24+	2	1	2		TNBC	TNBC1_LN	H2AFJ(12p)	CD44-CD24+	1	1	1
Her2	T1A	Lung	621K8(8q)	CD44-CD24+	2	1	2		TNBC	TNBC1_LN	H2AFJ(12p)	CD44-CD24+	1	1	1
Her2	T1A	Lung	621K8(8q)	CD44-CD24+	4	3	1.33333		TNBC	TNBC1_LN	H2AFJ(12p)	CD44-CD24+	2	2	1
Her2	T1A	Lung	621K8(8q)	CD44-CD24+	3	3	1		TNBC	TNBC1_LN	H2AFJ(12p)	CD44-CD24+	1	1	1
Her2	T1A	Lung	621K8(8q)	CD44-CD24+	4	3	1.33333		TNBC	TNBC1_LN	H2AFJ(12p)	CD44-CD24+	2	2	1
Her2	T1A	Lung	621K8(8q)	CD44-CD24+	2	1	2		TNBC	TNBC1_LN	H2AFJ(12p)	CD44-CD24+	2	2	1
Her2	T1A	Lung	621K8(8q)	CD44-CD24+	1	1	1		TNBC	TNBC1_LN	H2AFJ(12p)	CD44-CD24+	1	1	1
Her2	T1A	Lung	621K8(8q)	CD44-CD24+	3	1	3		TNBC	TNBC1_LN	H2AFJ(12p)	CD44-CD24+	1	1	1
Her2	T1A	Lung	621K8(8q)	CD44-CD24+	4	1	4		TNBC	TNBC1_LN	H2AFJ(12p)	CD44-CD24+	1	1	1
Her2	T1A	Lung	621K8(8q)	CD44-CD24+	5	2	2.5		TNBC	TNBC1_LN	H2AFJ(12p)	CD44-CD24+	1	1	1
Her2	T1A	Lung	621K8(8q)	CD44-CD24+	3	1	3		TNBC	TNBC1_LN	H2AFJ(12p)	CD44-CD24+	1	1	1
Her2	T1A	Lung	621K8(8q)	CD44-CD24+	6	2	3		TNBC	TNBC1_LN	H2AFJ(12p)	CD44-CD24+	0	1	0
Her2	T1A	Lung	621K8(8q)	CD44-CD24+	2	2	1		TNBC	TNBC1_LN	H2AFJ(12p)	CD44-CD24+	1	1	1
Her2	T1A	Lung	621K8(8q)	CD44-CD24+	0	2	0		TNBC	TNBC1_LN	H2AFJ(12p)	CD44-CD24+	1	1	1
Her2	T1A	Lung	621K8(8q)	CD44-CD24+	2	2	1		TNBC	TNBC1_LN	H2AFJ(12p)	CD44-CD24+	2	2	1
Her2	T1A	Lung	621K8(8q)	CD44-CD24+	2	1	2		TNBC	TNBC1_LN	H2AFJ(12p)	CD44-CD24+	0	1	0
Her2	T1A	Lung	621K8(8q)	CD44-CD24+	4	2	2		TNBC	TNBC1_LN	H2AFJ(12p)	CD44-CD24+	1	1	1
Her2	T1A	Lung	621K8(8q)	CD44-CD24+	7	2	3.5		TNBC	TNBC1_LN	H2AFJ(12p)	CD44-CD24+	1	1	1
Her2	T1A	Lung	621K8(8q)	CD44-CD24+	2	1	2		TNBC	TNBC1_LN	H2AFJ(12p)	CD44-CD24+	1	1	1
Her2	T1A	Lung	621K8(8q)	CD44-CD24+	5	4	1.25		TNBC	TNBC1_LN	H2AFJ(12p)	CD44-CD24+	1	1	1
Her2	T1A	Lung	621K8(8q)	CD44-CD24+	4	2	2		TNBC	TNBC1_LN	H2AFJ(12p)	CD44-CD24+	1	1	1
Her2	T1A	Lung	621K8(8q)	CD44-CD24+	2	3	0.666667		TNBC	TNBC1_LN	H2AFJ(12p)	CD44-CD24+	1	1	1
Her2	T1A	Lung	621K8(8q)	CD44-CD24+	3	2	1.5		TNBC	TNBC1_LN	H2AFJ(12p)	CD44-CD24+	2	2	1
Her2	T1A	Lung	621K8(8q)	CD44-CD24+	8	4	2		TNBC	TNBC1_LN	H2AFJ(12p)	CD44-CD24+	1	1	1
Her2	T1A	Lung	621K8(8q)	CD44-CD24+	4	2	2		TNBC	TNBC1_LN	H2AFJ(12p)	CD44-CD24+	1	2	0.5
Her2	T1A	Lung	621K8(8q)	CD44-CD24+	10	2	5		TNBC	TNBC1_LN	H2AFJ(12p)	CD44-CD24+	1	1	1
Her2	T1A	Lung	621K8(8q)	CD44-CD24+	5	4	1.25		TNBC	TNBC1_LN	H2AFJ(12p)	CD44-CD24+	2	2	1
Her2	T1A	Lung	621K8(8q)	CD44-CD24+	4	2	2		TNBC	TNBC1_LN	H2AFJ(12p)	CD44-CD24+	1	1	1
Her2	T1A	Lung	621K8(8q)	CD44-CD24-	7	4	1.75		TNBC	TNBC1_LN	H2AFJ(12p)	CD44-CD24+	1	1	1
Her2	T1A	Lung	621K8(8q)	CD44-CD24-	7	3	2.33333		TNBC	TNBC1_LN	H2AFJ(12p)	CD44-CD24+	2	2	1
Her2	T1A	Lung	621K8(8q)	CD44-CD24-	6	4	1.5		TNBC	TNBC1_LN	H2AFJ(12p)	CD44-CD24+	1	1	1
Her2	T1A	Lung	621K8(8q)	CD44-CD24-	2	1	2		TNBC	TNBC1_LN	H2AFJ(12p)	CD44-CD24+	1	1	1
Her2	T1A	Lung	621K8(8q)	CD44-CD24-	7	3	2.33333		TNBC	TNBC1_LN	H2AFJ(12p)	CD44-CD24+	2	2	1
Her2	T1A	Lung	621K8(8q)	CD44-CD24-	7	3	2.33333		TNBC	TNBC1_LN	H2AFJ(12p)	CD44-CD24+	2	2	1
Her2	T1A	Lung	621K8(8q)	CD44-CD24-	8	5	1.6		TNBC	TNBC1_LN	H2AFJ(12p)	CD44-CD24+	1	1	1
Her2	T1A	Lung	621K8(8q)	CD44-CD24-	6	1	6		TNBC	TNBC1_LN	H2AFJ(12p)	CD44-CD24+	1	1	1
Her2	T1A	Lung	621K8(8q)	CD44-CD24-	3	3	1		TNBC	TNBC1_LN	H2AFJ(12p)	CD44-CD24+	1	1	1
Her2	T1A	Lung	621K8(8q)	CD44-CD24-	5	1	5		TNBC	TNBC1_LN	H2AFJ(12p)	CD44-CD24+	2	1	2
Her2	T1A	Lung	621K8(8q)	CD44-CD24-	2	2	1		TNBC	TNBC1_LN	H2AFJ(12p)	CD44-CD24+	2	1	2
Her2	T1A	Lung	621K8(8q)	CD44-CD24-	7	4	1.75		TNBC	TNBC1_LN	H2AFJ(12p)	CD44-CD24+	1	1	1
Her2	T1A	Lung	621K8(8q)	CD44-CD24-	5	2	2.5		TNBC	TNBC1_LN	H2AFJ(12p)	CD44-CD24+	1	1	1
Her2	T1A	Lung	621K8(8q)	CD44-CD24-	7	4	1.75		TNBC	TNBC1_LN	H2AFJ(12p)	CD44-CD24+	2	2	1
Her2	T1A	Lung	621K8(8q)	CD44-CD24-	6	4	1.5		TNBC	TNBC1_LN	H2AFJ(12p)	CD44-CD24+	2	2	1
Her2	T1A	Lung	621K8(8q)	CD44-CD24-	4	1	4		TNBC	TNBC1_LN	H2AFJ(12p)	CD44-CD24+	1	1	1
Her2	T1A	Lung	621K8(8q)	CD44-CD24-	2	2	1		TNBC	TNBC1_LN	H2AFJ(12p)	CD44-CD24+	2	2	1
Her2	T1A	Lung	621K8(8q)	CD44-CD24-	1	1	1		TNBC	TNBC1_LN	H2AFJ(12p)	CD44-CD24+	1	1	1
Her2	T1A	Lung	621K8(8q)	CD44-CD24-	5	3	1.66667		TNBC	TNBC1_LN	H2AFJ(12p)	CD44-CD24+	0	1	0
Her2	T1A	Lung	621K8(8q)	CD44-CD24-	8	4	2		TNBC	TNBC1_LN	H2AFJ(12p)	CD44-CD24+	1	1	1
Her2	T1A	Lung	621K8(8q)	CD44-CD24-	5	3	1.66667		TNBC	TNBC1_LN	H2AFJ(12p)	CD44-CD24+	1	2	0.5
Her2	T1A	Lung	621K8(8q)	CD44-CD24-	6	4	1.5		TNBC	TNBC1_LN	H2AFJ(12p)	CD44-CD24+	2	1	2
Her2	T1A	Lung	621K8(8q)	CD44-CD24-	6	3	2		TNBC	TNBC1_LN	H2AFJ(12p)	CD44-CD24+	3	1	3
Her2	T1A	Lung	621K8(8q)	CD44-CD24-	5	2	2.5		TNBC	TNBC1_LN	H2AFJ(12p)	CD44-CD24+	1	1	1
Her2	T1A	Lung	621K8(8q)	CD44-CD24-	6	4	1.5		TNBC	TNBC1_LN	H2AFJ(12p)	CD44-CD24+	1	1	1
Her2	T1A	Lung	621K8(8q)	CD44-CD24-	7	2	3.5		TNBC	TNBC1_LN	H2AFJ(12p)	CD44-CD24+	0	1	0
Her2	T1A	Lung	621K8(8q)	CD44-CD24-	14	4	3.5		TNBC	TNBC1_LN	H2AFJ(12p)	CD44-CD24+	0	1	0
Her2	T1A	Lung	621K8(8q)	CD44-CD24-	4	2	2		TNBC	TNBC1_LN	H2AFJ(12p)	CD44-CD24+	0	1	0
Her2	T1A	Lung	621K8(8q)	CD44-CD24-	1	1	1		TNBC	TNBC1_LN	H2AFJ(12p)	CD44-CD24+	1	1	1
Her2	T1A	Lung	621K8(8q)	CD44-CD24-	8	4	2		TNBC	TNBC1_LN	H2AFJ(12p)	CD44-CD24+	1	2	0.5
Her2	T1A	Lung	621K8(8q)	CD44-CD24-	4	2	2		TNBC	TNBC1_LN	H2AFJ(12p)	CD44-CD24-	1	1	1
Her2	T1A	Lung	621K8(8q)	CD44-CD24-	4	1	4		TNBC	TNBC1_LN	H2AFJ(12p)	CD44-CD24-	1	1	1
Her2	T1A	Lung	621K8(8q)	CD44-CD24-	2	1	2		TNBC	TNBC1_LN	H2AFJ(12p)	CD44-CD24-	0	1	0
Her2	T1A	Lung	621K8(8q)	CD44-CD24-	6	4	1.5		TNBC	TNBC1_LN	H2AFJ(12p)	CD44-CD24-	1	1	1
Her2	T1A	Lung	621K8(8q)	CD44-CD24-	2	2	1		TNBC	TNBC1_LN	H2AFJ(12p)	CD44-CD24-	1	1	1
Her2	T1A	Lung	621K8(8q)	CD44-CD24-	3	2	1.5		TNBC	TNBC1_LN	H2AFJ(12p)	CD44-CD24-	0	1	0
Her2	T1A	Lung	621K8(8q)	CD44-CD24-	3	3	1		TNBC	TNBC1_LN	H2AFJ(12p)	CD44-CD24-	2	2	1
Her2	T1A	Lung	621K8(8q)	CD44-CD24-	7	4	1.75		TNBC	TNBC1_LN	H2AFJ(12p)	CD44-CD24-	1	1	1
Her2	T1A	Lung	621K8(8q)	CD44-CD24-	4	3	1.33333		TNBC	TNBC1_LN	H2AFJ(12p)	CD44-CD24-	0	1	0
Her2	T1A	Lung	621K8(8q)	CD44-CD24-	10	6	1.66667		TNBC	TNBC1_LN	H2AFJ(12p)	CD44-CD24-	2	1	2
Her2	T1A	Lung	621K8(8q)	CD44-CD24-	1	1	1		TNBC	TNBC1_LN	H2AFJ(12p)	CD44-CD24-	2	2	1
Her2	T1A	Lung	621K8(8q)	CD44-CD24-	4	3	1.33333		TNBC	TNBC1_LN	H2AFJ(12p)	CD44-CD24-	2	2	1
Her2	T1A	Lung	621K8(8q)	CD44-CD24-	1	1	1		TNBC	TNBC1_LN	H2AFJ(12p)	CD44-CD24-	1	1	1
Her2	T1A	Lung	621K8(8q)	CD44-CD24-	1	1	1		TNBC	TNBC1_LN	H2AFJ(12p)	CD44-CD24-	1	2	0.5
Her2	T1A	Lung	621K8(8q)	CD44-CD24-	1	1	1		TNBC	TNBC1_LN	H2AFJ(12p)	CD44-CD24-	2	2	1
Her2	T1A	Lung	621K8(8q)	CD44-CD24-	1	1	1		TNBC	TNBC1_LN	H2AFJ(12p)	CD44-CD24-	1	1	1
Her2	T1A	Lung	621K8(8q)	CD44-CD24-	3	1	3		TNBC	TNBC1_LN	H2AFJ(12p)	CD44-CD24-	0	1	0
Her2	T1A	Lung	621K8(8q)	CD44-CD24-	1	1	1		TNBC	TNBC1_LN	H2AFJ(12p)	CD44-CD24-	1	1	1
Her2	T1A	Lung	621K8(8q)	CD44-CD24-	1	2	0.5		TNBC	TNBC1_LN	H2AFJ(12p)	CD44-CD24-	1	1	1
Her2	T1A	Lung	621K8(8q)	CD44-CD24-	11	5	2.2		TNBC	TNBC1_LN	H2AFJ(12p)	CD44-CD24-	2	1	2
Her2	T1A	Lung	621K8(8q)	CD44-CD24-	3	1	3		TNBC	TNBC1_LN	H2AFJ(12p)	CD44-CD24-	1	1	1
Her2	T1A	Lung	621K8(8q)	CD44-CD24-	3	2	1.5		TNBC	TNBC1_LN	H2AFJ(12p)	CD44-CD24-	1	1	1
Her2	T1A	Lung	621K8(8q)	CD44-CD24-	1	1	1		TNBC	TNBC1_LN	H2AFJ(12p)	CD44-CD24-	1	1	1
Her2	T1A	Lung	621K8(8q)	CD44-CD24-	13	5	2.6		TNBC	TNBC1_LN	H2AFJ(12p)	CD44-CD24-	1	1	1
Her2	T1A	Lung	621K8(8q)	CD44-CD24-	5	5	1		TNBC	TNBC1_LN	H2AFJ(12p)	CD44-CD24-	1	1	1
Her2	T1A	Lung	621K8(8q)	CD44-CD24-	1	1	1		TNBC	TNBC1_LN	H2AFJ(12p)	CD44-CD24-	1	1	1
Her2	T1A	Lung	621K8(8q)	CD44-CD24-	1	1	1		TNBC	TNBC1_LN	H2AFJ(12p)	CD44-CD24-	1	1	1
Her2	T1A	Lung	621K8(8q)	CD44-CD24-	1	2	0.5		TNBC	TNBC1_LN	H2AFJ(12p)	CD44-CD24-	0	1	0
Her2	T1A	Lung	621K8(8q)	CD44-CD24-	0	1	0		TNBC	TNBC1_LN	H2AFJ(12p)	CD44-CD24-	1	2	0.5
Her2	T1A	Lung	621K8(8q)	CD44-CD24-	1	1	1		TNBC	TNBC1_LN	H2AFJ(12p)	CD44-CD24-	0	2	0
Her2	T1A	Lung	621K8(8q)	CD44-CD24-	5	3	1.66667		TNBC	TNBC1_LN	H2AFJ(12p)	CD44-CD24-	1	1	1
Her2	T1A	Lung	621K8(8q)	CD44-CD24-	7	4	1.75		TNBC	TNBC1_LN	H2AFJ(12p)	CD44-CD24-	1	1	1
Her2	T1A	Lung	621K8(8q)	CD44-CD24-	1	2	0.5		TNBC	TNBC1_LN	H2AFJ(12p)	CD44-CD24-	1	1	1
Her2	T1A	Lung	621K8(8q)	CD44-CD24-	1	1	1		TNBC	TNBC1_LN	H2AFJ(12p)	CD44-CD24-	1	1	1
Her2	T1A	Lung	621K8(8q)	CD44-CD24-	1	1	1		TNBC	TNBC1_LN	H2AFJ(12p)	CD44-CD24-	1	1	1
Her2	T1A	Lung	621K8(8q)	CD44-CD24-	4	3	1.33333		TNBC	TNBC1_LN	H2AFJ(12p)	CD44-CD24-	1	1	1
Her2	T1A	Lung	621K8(8q)	CD44-CD24-	4	1	4		TNBC	TNBC1_LN	H2AFJ(12p)	CD44-CD24-	1	1	1
Her2	T1A	Lung	621K8(8q)	CD44-CD24-	0	1	0		TNBC	TNBC1_LN	H2AFJ(12p)	CD44-CD24-	2	2	1
Her2	T1A	Lung	621K8(8q)	CD44-CD24-	6	3	2		TNBC	TNBC1_LN	H2AFJ(12p)	CD44-CD24-	2	2	1
Her2	T1A	Lung	621K8(8q)	CD44-CD24-	1	1	1		TNBC	TNBC1_LN	H2AFJ(12p)	CD44-CD24-	1	1	1
Her2	T1B	Spleen	NUAK2(1q)	CD44+CD24-	3	3	1		TNBC	TNBC1_LN	H2AFJ(12p)	CD44-CD24-	1	1	1
Her2	T1B	Spleen	NUAK2(1q)	CD44+CD24-	3	2	1.5		TNBC	TNBC1_LN	H2AFJ(12p)	CD44-CD24-	1	1	1
Her2	T1B	Spleen	NUAK2(1q)	CD44+CD24-	2	2	1		TNBC	TNBC1_LN	H2AFJ(12p)	CD44-CD24-	1	1	1
Her2	T1B	Spleen	NUAK2(1q)	CD44+CD24-	4	2	2		TNBC	TNBC1_LN	H2AFJ(12p)	CD44-CD24-	1	1	1
Her2	T1B	Spleen	NUAK2(1q)	CD44+CD24-	3	3	1		TNBC	TNBC1_LN	H2AFJ(12p)	CD44-CD24-	2	2	1
Her2	T1B	Spleen	NUAK2(1q)	CD44+CD24-	3	2	1.5		TNBC	TNBC1_LN	H2AFJ(12p)	CD44-CD24-	1	1	1
Her2	T1B	Spleen	NUAK2(1q)	CD44+CD24-	2	1	2		TNBC	TNBC1_LN	H2AFJ(12p)	CD44-CD24-	1	1	1
Her2	T1B	Spleen	NUAK2(1q)	CD44+CD24-	2	2	1		TNBC	TNBC1_LN	H2AFJ(12p)	CD44-CD24-	0	1	0
Her2	T1B	Spleen	NUAK2(1q)	CD44+CD24-	4	3	1.33333		TNBC	TNBC1_LN	H2AFJ(12p)	CD44-CD24-	0	1	0
Her2	T1B	Spleen	NUAK2(1q)	CD44+CD24-	8	8	1		TNBC	TNBC1_LN	H2AFJ(12p)	CD44-CD24-	0	1	0
Her2	T1B	Spleen	NUAK2(1q)	CD44+CD24-	3	3	1		TNBC	TNBC1_LN	H2AFJ(12p)	CD44-CD24-	0	1	0
Her2	T1B	Spleen	NUAK2(1q)	CD44+CD24-	1	1	1		TNBC	TNBC1_LN	H2AFJ(12p)	CD44-CD24-	2	2	1
Her2	T1B	Spleen	NUAK2(1q)	CD44+CD24-	2	3	0.666667		TNBC	TNBC1_LN	H2AFJ(12p)	CD44-CD24-	2	2	1
Her2	T1B	Spleen	NUAK2(1q)	CD44+CD24-	1	2	0.5		TNBC	TNBC1_LN	H2AFJ(12p)	CD44-CD24-	1	1	1
Her2	T1B	Spleen	NUAK2(1q)	CD44+CD24-	5	3	1.66667		TNBC	TNBC1_LN	H2AFJ(12p)	CD44-CD24-	1	1	1
Her2	T1B	Spleen	NUAK2(1q)	CD44+CD24-	3	3	1		TNBC	TNBC1_LN	H2AFJ(12p)	CD44-CD24-	1	1	1
Her2	T1B	Spleen	NUAK2(1q)	CD44+CD24-	2	2	1		TNBC	TNBC1_LN	H2AFJ(12p)	CD44-CD24-	1	1	1
Her2	T1B	Spleen	NUAK2(1q)	CD44+CD24-	0	2	0		TNBC	TNBC1_LN	H2AFJ(12p)	CD44-CD24-	1	1	1
Her2	T1B	Spleen	NUAK2(1q)	CD44+CD24-	2	2	1		TNBC	TNBC1_LN	H2AFJ(12p)	CD44-CD24-	1	1	1
Her2	T1B	Spleen	NUAK2(1q)	CD44+CD24-	2	2	1		TNBC	TNBC1_LN	H2AFJ(12p)	CD44-CD24-	2	2	1
Her2	T1B	Spleen	NUAK2(1q)	CD44+CD24-	3	4	0.75		TNBC	TNBC1_LN	H2AFJ(12p)	CD44-CD24-	0	1	0
Her2	T1B	Spleen	NUAK2(1q)	CD44+CD24-	3	3	1		TNBC	TNBC1_LN	H2AFJ(12p)	CD44-CD24-	1	1	1
Her2	T1B	Spleen	NUAK2(1q)	CD44+CD24-	1	1	1		TNBC	TNBC1_LN	H2AFJ(12p)	CD44-CD24-	1	1	1
Her2	T1B	Spleen	NUAK2(1q)	CD44+CD24-	3	1	3		TNBC	TNBC1_LN	H2AFJ(12p)	CD44-CD24-	1	1	1
Her2	T1B	Spleen	NUAK2(1q)	CD44+CD24-	3	5	0.6		TNBC	TNBC1_LN	H2AFJ(12p)	CD44-CD24-	1	1	1
Her2	T1B	Spleen	NUAK2(1q)	CD44+CD24-	3	1	3		TNBC	TNBC1_LN	H2AFJ(12p)	CD44-CD24-	1	1	1
Her2	T1B	Spleen	NUAK2(1q)	CD44+CD24-	1	1	1		TNBC	TNBC1_LN	H2AFJ(12p)	CD44-CD24-	1	1	1
Her2	T1B	Spleen	NUAK2(1q)	CD44+CD24-	4	6	0.666667		TNBC	TNBC1_LN	H2AFJ(12p)	CD44-CD24-	1	1	1
Her2	T1B	Spleen	NUAK2(1q)	CD44+CD24-	1	1	1		TNBC	TNBC1_LN	H2AFJ(12p)	CD44-CD24-	1	1	1
Her2	T1B	Spleen	NUAK2(1q)	CD44+CD24-	1	1	1		TNBC	TNBC1_LN	H2AFJ(12p)	CD44-CD24-	1	1	1
Her2	T1B	Spleen	NUAK2(1q)	CD44+CD24-	3	1	3		TNBC	TNBC1_LN	H2AFJ(12p)	CD44-CD24-	2	2	1
Her2	T1B	Spleen	NUAK2(1q)	CD44+CD24-	3	3	1		TNBC	TNBC1_LN	H2AFJ(12p)	CD44-CD24-	1	1	1
Her2	T1B	Spleen	NUAK2(1q)	CD44+CD24-	3	2	1.5		TNBC	TNBC1_LN	H2AFJ(12p)	CD44-CD24-	2	2	1
Her2	T1B	Spleen	NUAK2(1q)	CD44+CD24-	2	2	1		TNBC	TNBC1_LN	H2AFJ(12p)	CD44-CD24-	1	1	1
Her2	T1B	Spleen	NUAK2(1q)	CD44+CD24-	1	4	0.25		TNBC	TNBC1_LN	H2AFJ(12p)	CD44-CD24-	1	1	1
Her2	T1B	Spleen	NUAK2(1q)	CD44+CD24-	2	4	0.5		TNBC	TNBC1_LN	H2AFJ(12p)	CD44-CD24-	0	1	0
Her2	T1B	Spleen	NUAK2(1q)	CD44+CD24-	5	5	1		TNBC	TNBC1_LN	H2AFJ(12p)	CD44-CD24-	0	1	0
Her2	T1B	Spleen	NUAK2(1q)	CD44+CD24-	3	4	0.75		TNBC	TNBC1_LN	H2AFJ(12p)	CD44-CD24-	1	1	1
Her2	T1B	Spleen	NUAK2(1q)	CD44+CD24-	1	1	1		TNBC	TNBC1_LN	H2AFJ(12p)	CD44-CD24-	1	1	1
Her2	T1B	Spleen	NUAK2(1q)	CD44+CD24-	1	1	1		TNBC	TNBC1_LN	H2AFJ(12p)	CD44-CD24-	0	1	0
Her2	T1B	Spleen	NUAK2(1q)	CD44+CD24-	2	2	1		TNBC	TNBC1_LN	H2AFJ(12p)	CD44-CD24-	1	1	1
Her2	T1B	Spleen	NUAK2(1q)	CD44+CD24-	2	1	2		TNBC	TNBC1_LN	H2AFJ(12p)	CD44-CD24-	1	1	1
Her2	T1B	Spleen	NUAK2(1q)	CD44+CD24-	2	2	1		TNBC	TNBC1_LN	H2AFJ(12p)	CD44-CD24-	1	1	1
Her2	T1B	Spleen	NUAK2(1q)	CD44+CD24-	1	1	1		TNBC	TNBC1_LN	H2AFJ(12p)	CD44-CD24-	1	1	1
Her2	T1B	Spleen	NUAK2(1q)	CD44+CD24-	3	3	1		TNBC	TNBC1_LN	H2AFJ(12p)	CD44-CD24-	1	1	1
Her2	T1B	Spleen	NUAK2(1q)	CD44+CD24-	2	2	1		TNBC	TNBC1_LN	H2AFJ(12p)	CD44-CD24-	0	1	0
Her2	T1B	Spleen	NUAK2(1q)	CD44+CD24-	1	1	1		TNBC	TNBC1_LN	H2AFJ(12p)	CD44-CD24-	1	2	0.5
Her2	T1B	Spleen	NUAK2(1q)	CD44+CD24-	5	5	1		TNBC	TNBC1_LN	H2AFJ(12p)	CD44-CD24-	2	2	1
Her2	T1B	Spleen	NUAK2(1q)	CD44+CD24-	3	3	1		TNBC	TNBC1_LN	H2AFJ(12p)	CD44-CD24-	2	1	2
Her2	T1B	Spleen	NUAK2(1q)	CD44+CD24-	3	3	1		TNBC	TNBC1_LN	H2AFJ(12p)	CD44-CD24-	1	1	1
Her2	T1B	Spleen	NUAK2(1q)	CD44+CD24-	2	1	2		TNBC	TNBC1_LN	H2AFJ(12p)	CD44-CD24-	1	1	1
Her2	T1B	Spleen	NUAK2(1q)	CD44+CD24-	2	1	2		TNBC	TNBC1_LN	H2AFJ(12p)	CD44-CD24-	1	1	1
Her2	T1B	Spleen	NUAK2(1q)	CD44+CD24-	4	2	2		TNBC	TNBC1_LN	H2AFJ(12p)	CD44-CD24-	1	1	1
Her2	T1B	Spleen	NUAK2(1q)	CD44+CD24-	4	2	2		TNBC	TNBC1_LN	H2AFJ(12p)	CD44-CD24-	1	1	1
Her2	T1B	Spleen	NUAK2(1q)	CD44+CD24-	2	3	0.666667		TNBC	TNBC1_LN	H2AFJ(12p)	CD44-CD24-	1	1	1
Her2	T1B	Spleen	NUAK2(1q)	CD44+CD24-	2	2	1		TNBC	TNBC1_LN	H2AFJ(12p)	CD44-CD24-	0	1	0
Her2	T1B	Spleen	NUAK2(1q)	CD44+CD24-	5	3	1.66667		TNBC	TNBC1_LN	H2AFJ(12p)	CD44-CD24-	1	1	1
Her2	T1B	Spleen	NUAK2(1q)	CD44+CD24-	3	3	1		TNBC	TNBC1_LN	H2AFJ(12p)	CD44-CD24-	2	1	2
Her2	T1B	Spleen	NUAK2(1q)	CD44+CD24-	3	3	1		TNBC	TNBC1_LN	H2AFJ(12p)	CD44-CD24-	1	1	1
Her2	T1B	Spleen	NUAK2(1q)	CD44+CD24-	3	4	0.75		TNBC	TNBC1_LN	H2AFJ(12p)	CD44-CD24-	2	1	2
Her2	T1B	Spleen	NUAK2(1q)	CD44+CD24-	5	5	1		TNBC	TNBC1_LN	ITGA8(10p)	CD44-CD24+	2	1	2
Her2	T1B	Spleen	NUAK2(1q)	CD44+CD24-	3	1	3		TNBC	TNBC1_LN	ITGA8(10p)	CD44-CD24+	2	3	0.666667
Her2	T1B	Spleen	NUAK2(1q)	CD44+CD24-	2	3	0.666667		TNBC	TNBC1_LN	ITGA8(10p)	CD44-CD24+	1	1	1
Her2	T1B	Spleen	NUAK2(1q)	CD44+CD24-	6	5	1.2		TNBC	TNBC1_LN	ITGA8(10p)	CD44-CD24+	1	1	1
Her2	T1B	Spleen	NUAK2(1q)	CD44+CD24-	3	3	1		TNBC	TNBC1_LN	ITGA8(10p)	CD44-CD24+	2	2	1
Her2	T1B	Spleen	NUAK2(1q)	CD44+CD24-	5	3	1.66667		TNBC	TNBC1_LN	ITGA8(10p)	CD44-CD24+	3	3	1
Her2	T1B	Spleen	NUAK2(1q)	CD44+CD24-	5	3	1.66667		TNBC	TNBC1_LN	ITGA8(10p)	CD44-CD24+	5	5	1
Her2	T1B	Spleen	NUAK2(1q)	CD44+CD24-	2	3	0.666667		TNBC	TNBC1_LN	ITGA8(10p)	CD44-CD24+	1	2	0.5
Her2	T1B	Spleen	NUAK2(1q)	CD44+CD24-	3	2	1.5		TNBC	TNBC1_LN	ITGA8(10p)	CD44-CD24+	2	1	2
Her2	T1B	Spleen	NUAK2(1q)	CD44+CD24-	5	5	1		TNBC	TNBC1_LN	ITGA8(10p)	CD44-CD24+	4	2	2
Her2	T1B	Spleen	NUAK2(1q)	CD44+CD24-	1	1	1		TNBC	TNBC1_LN	ITGA8(10p)	CD44-CD24+	3	3	1
Her2	T1B	Spleen	NUAK2(1q)	CD44+CD24-	1	1	1		TNBC	TNBC1_LN	ITGA8(10p)	CD44-CD24+	1	1	1
Her2	T1B	Spleen	NUAK2(1q)	CD44+CD24-	3	2	1.5		TNBC	TNBC1_LN	ITGA8(10p)	CD44-CD24+	1	1	1
Her2	T1B	Spleen	NUAK2(1q)	CD44+CD24-	4	2	2		TNBC	TNBC1_LN	ITGA8(10p)	CD44-CD24+	4	2	2
Her2	T1B	Spleen	NUAK2(1q)	CD44+CD24-	2	2	1		TNBC	TNBC1_LN	ITGA8(10p)	CD44-CD24+	1	1	1
Her2	T1B	Spleen	NUAK2(1q)	CD44+CD24-	1	1	1		TNBC	TNBC1_LN	ITGA8(10p)	CD44-CD24+	1	1	1
Her2	T1B	Spleen	NUAK2(1q)	CD44+CD24-	1	1	1		TNBC	TNBC1_LN	ITGA8(10p)	CD44-CD24+	0	1	0
Her2	T1B	Spleen	NUAK2(1q)	CD44+CD24-	2	2	1		TNBC	TNBC1_LN	ITGA8(10p)	CD44-CD24+	2	1	2
Her2	T1B	Spleen	NUAK2(1q)	CD44+CD24-	3	2	1.5		TNBC	TNBC1_LN	ITGA8(10p)	CD44-CD24+	0	2	0
Her2	T1B	Spleen	NUAK2(1q)	CD44+CD24-	5	5	1		TNBC	TNBC1_LN	ITGA8(10p)	CD44-CD24+	2	2	1
Her2	T1B	Spleen	NUAK2(1q)	CD44+CD24-	3	2	1.5		TNBC	TNBC1_LN	ITGA8(10p)	CD44-CD24+	2	2	1
Her2	T1B	Spleen	NUAK2(1q)	CD44+CD24-	3	2	1.5		TNBC	TNBC1_LN	ITGA8(10p)	CD44-CD24+	1	1	1
Her2	T1B	Spleen	NUAK2(1q)	CD44+CD24-	2	1	2		TNBC	TNBC1_LN	ITGA8(10p)	CD44-CD24+	0	1	0
Her2	T1B	Spleen	NUAK2(1q)	CD44+CD24-	2	1	2		TNBC	TNBC1_LN	ITGA8(10p)	CD44-CD24+	0	1	0
Her2	T1B	Spleen	NUAK2(1q)	CD44+CD24-	6	5	1.2		TNBC	TNBC1_LN	ITGA8(10p)	CD44-CD24+	1	2	0.5
Her2	T1B	Spleen	NUAK2(1q)	CD44+CD24-	5	5	1		TNBC	TNBC1_LN	ITGA8(10p)	CD44-CD24+	0	2	0
Her2	T1B	Spleen	NUAK2(1q)	CD44+CD24-	5	6	0.833333		TNBC	TNBC1_LN	ITGA8(10p)	CD44-CD24+	1	2	0.5
Her2	T1B	Spleen	NUAK2(1q)	CD44+CD24-	3	2	1.5		TNBC	TNBC1_LN	ITGA8(10p)	CD44-CD24+	1	1	1
Her2	T1B	Spleen	NUAK2(1q)	CD44+CD24-	5	3	1.66667		TNBC	TNBC1_LN	ITGA8(10p)	CD44-CD24+	1	1	1
Her2	T1B	Spleen	NUAK2(1q)	CD44+CD24-	4	4	1		TNBC	TNBC1_LN	ITGA8(10p)	CD44-CD24+	4	4	1
Her2	T1B	Spleen	NUAK2(1q)	CD44+CD24-	3	2	1.5		TNBC	TNBC1_LN	ITGA8(10p)	CD44-CD24+	2	3	0.666667
Her2	T1B	Spleen	NUAK2(1q)	CD44+CD24-	3	2	1.5		TNBC	TNBC1_LN	ITGA8(10p)	CD44-CD24+	1	2	0.5
Her2	T1B	Spleen	NUAK2(1q)	CD44+CD24-	5	7	0.714286		TNBC	TNBC1_LN	ITGA8(10p)	CD44-CD24+	1	1	1
Her2	T1B	Spleen	NUAK2(1q)	CD44+CD24-	3	2	1.5		TNBC	TNBC1_LN	ITGA8(10p)	CD44-CD24+	1	1	1
Her2	T1B	Spleen	NUAK2(1q)	CD44+CD24-	3	3	1		TNBC	TNBC1_LN	ITGA8(10p)	CD44-CD24+	2	2	1
Her2	T1B	Spleen	NUAK2(1q)	CD44+CD24-	2	2	1		TNBC	TNBC1_LN	ITGA8(10p)	CD44-CD24+	2	2	1
Her2	T1B	Spleen	NUAK2(1q)	CD44+CD24-	2	2	1		TNBC	TNBC1_LN	ITGA8(10p)	CD44-CD24+	2	2	1
Her2	T1B	Spleen	NUAK2(1q)	CD44+CD24-	4	1	4		TNBC	TNBC1_LN	ITGA8(10p)	CD44-CD24+	2	3	0.666667
Her2	T1B	Spleen	NUAK2(1q)	CD44+CD24-	3	3	1		TNBC	TNBC1_LN	ITGA8(10p)	CD44-CD24+	1	1	1
Her2	T1B	Spleen	NUAK2(1q)	CD44+CD24-	3	3	1		TNBC	TNBC1_LN	ITGA8(10p)	CD44-CD24+	1	1	1
Her2	T1B	Spleen	NUAK2(1q)	CD44+CD24+	2	2	1		TNBC	TNBC1_LN	ITGA8(10p)	CD44-CD24+	2	2	1
Her2	T1B	Spleen	NUAK2(1q)	CD44+CD24+	5	6	0.833333		TNBC	TNBC1_LN	ITGA8(10p)	CD44-CD24+	1	1	1
Her2	T1B	Spleen	NUAK2(1q)	CD44+CD24+	6	3	2		TNBC	TNBC1_LN	ITGA8(10p)	CD44-CD24+	1	1	1
Her2	T1B	Spleen	NUAK2(1q)	CD44+CD24+	7	6	1.16667		TNBC	TNBC1_LN	ITGA8(10p)	CD44-CD24+	1	1	1
Her2	T1B	Spleen	NUAK2(1q)	CD44+CD24+	2	2	1		TNBC	TNBC1_LN	ITGA8(10p)	CD44-CD24+	3	4	0.75
Her2	T1B	Spleen	NUAK2(1q)	CD44+CD24+	2	4	0.5		TNBC	TNBC1_LN	ITGA8(10p)	CD44-CD24+	3	3	1
Her2	T1B	Spleen	NUAK2(1q)	CD44+CD24+	5	2	2.5		TNBC	TNBC1_LN	ITGA8(10p)	CD44-CD24+	3	2	1.5
Her2	T1B	Spleen	NUAK2(1q)	CD44+CD24+	5	4	1.25		TNBC	TNBC1_LN	ITGA8(10p)	CD44-CD24+	2	1	2
Her2	T1B	Spleen	NUAK2(1q)	CD44+CD24+	4	4	1		TNBC	TNBC1_LN	ITGA8(10p)	CD44-CD24+	2	2	1
Her2	T1B	Spleen	NUAK2(1q)	CD44+CD24+	1	2	0.5		TNBC	TNBC1_LN	ITGA8(10p)	CD44-CD24+	2	2	1
Her2	T1B	Spleen	NUAK2(1q)	CD44+CD24+	5	6	0.833333		TNBC	TNBC1_LN	ITGA8(10p)	CD44-CD24+	1	1	1
Her2	T1B	Spleen	NUAK2(1q)	CD44+CD24+	2	2	1		TNBC	TNBC1_LN	ITGA8(10p)	CD44-CD24+	1	1	1
Her2	T1B	Spleen	NUAK2(1q)	CD44+CD24+	7	3	2.33333		TNBC	TNBC1_LN	ITGA8(10p)	CD44-CD24+	1	1	1
Her2	T1B	Spleen	NUAK2(1q)	CD44+CD24+	4	2	2		TNBC	TNBC1_LN	ITGA8(10p)	CD44-CD24+	2	2	1
Her2	T1B	Spleen	NUAK2(1q)	CD44+CD24+	2	3	0.666667		TNBC	TNBC1_LN	ITGA8(10p)	CD44-CD24+	1	1	1
Her2	T1B	Spleen	NUAK2(1q)	CD44+CD24+	1	1	1		TNBC	TNBC1_LN	ITGA8(10p)	CD44-CD24+	1	2	0.5
Her2	T1B	Spleen	NUAK2(1q)	CD44+CD24+	6	9	0.666667		TNBC	TNBC1_LN	ITGA8(10p)	CD44-CD24+	2	2	1
Her2	T1B	Spleen	NUAK2(1q)	CD44+CD24+	3	5	0.6		TNBC	TNBC1_LN	ITGA8(10p)	CD44-CD24+	2	1	2
Her2	T1B	Spleen	NUAK2(1q)	CD44+CD24+	2	4	0.5		TNBC	TNBC1_LN	ITGA8(10p)	CD44-CD24+	2	2	1
Her2	T1B	Spleen	NUAK2(1q)	CD44+CD24+	1	2	0.5		TNBC	TNBC1_LN	ITGA8(10p)	CD44-CD24+	3	3	1
Her2	T1B	Spleen	NUAK2(1q)	CD44+CD24+	3	1	3		TNBC	TNBC1_LN	ITGA8(10p)	CD44-CD24+	1	1	1
Her2	T1B	Spleen	NUAK2(1q)	CD44+CD24+	2	4	0.5		TNBC	TNBC1_LN	ITGA8(10p)	CD44-CD24+	3	3	1
Her2	T1B	Spleen	NUAK2(1q)	CD44+CD24+	4	3	1.33333		TNBC	TNBC1_LN	ITGA8(10p)	CD44-CD24+	2	1	2
Her2	T1B	Spleen	NUAK2(1q)	CD44+CD24+	2	2	1		TNBC	TNBC1_LN	ITGA8(10p)	CD44-CD24+	2	1	2
Her2	T1B	Spleen	NUAK2(1q)	CD44+CD24+	3	2	1.5		TNBC	TNBC1_LN	ITGA8(10p)	CD44-CD24+	0	2	0
Her2	T1B	Spleen	NUAK2(1q)	CD44+CD24+	4	4	1		TNBC	TNBC1_LN	ITGA8(10p)	CD44-CD24+	2	1	2
Her2	T1B	Spleen	NUAK2(1q)	CD44+CD24+	3	3	1		TNBC	TNBC1_LN	ITGA8(10p)	CD44-CD24+	3	2	1.5
Her2	T1B	Spleen	NUAK2(1q)	CD44+CD24+	2	4	0.5		TNBC	TNBC1_LN	ITGA8(10p)	CD44-CD24+	2	2	1
Her2	T1B	Spleen	NUAK2(1q)	CD44+CD24+	8	6	1.33333		TNBC	TNBC1_LN	ITGA8(10p)	CD44-CD24+	3	2	1.5
Her2	T1B	Spleen	NUAK2(1q)	CD44+CD24+	4	2	2		TNBC	TNBC1_LN	ITGA8(10p)	CD44-CD24+	2	1	2
Her2	T1B	Spleen	NUAK2(1q)	CD44+CD24+	6	6	1		TNBC	TNBC1_LN	ITGA8(10p)	CD44-CD24+	1	1	1
Her2	T1B	Spleen	NUAK2(1q)	CD44+CD24+	3	4	0.75		TNBC	TNBC1_LN	ITGA8(10p)	CD44-CD24+	1	1	1
Her2	T1B	Spleen	NUAK2(1q)	CD44+CD24+	5	3	1.66667		TNBC	TNBC1_LN	ITGA8(10p)	CD44-CD24+	1	1	1
Her2	T1B	Spleen	NUAK2(1q)	CD44+CD24+	3	4	0.75		TNBC	TNBC1_LN	ITGA8(10p)	CD44-CD24+	1	1	1
Her2	T1B	Spleen	NUAK2(1q)	CD44+CD24+	3	3	1		TNBC	TNBC1_LN	ITGA8(10p)	CD44-CD24+	2	2	1
Her2	T1B	Spleen	NUAK2(1q)	CD44+CD24+	4	2	2		TNBC	TNBC1_LN	ITGA8(10p)	CD44-CD24+	2	3	0.666667
Her2	T1B	Spleen	NUAK2(1q)	CD44+CD24+	2	1	2		TNBC	TNBC1_LN	ITGA8(10p)	CD44-CD24+	2	2	1
Her2	T1B	Spleen	NUAK2(1q)	CD44+CD24+	4	3	1.33333		TNBC	TNBC1_LN	ITGA8(10p)	CD44-CD24+	1	1	1
Her2	T1B	Spleen	NUAK2(1q)	CD44+CD24+	4	5	0.8		TNBC	TNBC1_LN	ITGA8(10p)	CD44-CD24+	1	1	1
Her2	T1B	Spleen	NUAK2(1q)	CD44+CD24+	5	4	1.25		TNBC	TNBC1_LN	ITGA8(10p)	CD44-CD24+	1	3	0.333333
Her2	T1B	Spleen	NUAK2(1q)	CD44+CD24+	3	3	1		TNBC	TNBC1_LN	ITGA8(10p)	CD44-CD24+	2	3	0.666667
Her2	T1B	Spleen	NUAK2(1q)	CD44+CD24+	5	3	1.66667		TNBC	TNBC1_LN	ITGA8(10p)	CD44-CD24+	2	2	1
Her2	T1B	Spleen	NUAK2(1q)	CD44+CD24+	6	5	1.2		TNBC	TNBC1_LN	ITGA8(10p)	CD44-CD24+	2	2	1
Her2	T1B	Spleen	NUAK2(1q)	CD44+CD24+	4	4	1		TNBC	TNBC1_LN	ITGA8(10p)	CD44-CD24+	2	2	1
Her2	T1B	Spleen	NUAK2(1q)	CD44+CD24+	4	4	1		TNBC	TNBC1_LN	ITGA8(10p)	CD44-CD24+	0	1	0
Her2	T1B	Spleen	NUAK2(1q)	CD44+CD24+	2	3	0.666667		TNBC	TNBC1_LN	ITGA8(10p)	CD44-CD24+	1	1	1
Her2	T1B	Spleen	NUAK2(1q)	CD44+CD24+	5	3	1.66667		TNBC	TNBC1_LN	ITGA8(10p)	CD44-CD24+	1	1	1
Her2	T1B	Spleen	NUAK2(1q)	CD44+CD24+	4	6	0.666667		TNBC	TNBC1_LN	ITGA8(10p)	CD44-CD24+	2	2	1
Her2	T1B	Spleen	NUAK2(1q)	CD44+CD24+	11	7	1.57143		TNBC	TNBC1_LN	ITGA8(10p)	CD44-CD24+	3	3	1
Her2	T1B	Spleen	NUAK2(1q)	CD44+CD24+	2	3	0.666667		TNBC	TNBC1_LN	ITGA8(10p)	CD44-CD24+	2	3	0.666667
Her2	T1B	Spleen	NUAK2(1q)	CD44+CD24+	3	1	3		TNBC	TNBC1_LN	ITGA8(10p)	CD44-CD24+	1	1	1
Her2	T1B	Spleen	NUAK2(1q)	CD44+CD24+	2	3	0.666667		TNBC	TNBC1_LN	ITGA8(10p)	CD44-CD24+	2	2	1
Her2	T1B	Spleen	NUAK2(1q)	CD44+CD24+	2	1	2		TNBC	TNBC1_LN	ITGA8(10p)	CD44-CD24+	1	1	1
Her2	T1B	Spleen	NUAK2(1q)	CD44+CD24+	2	3	0.666667		TNBC	TNBC1_LN	ITGA8(10p)	CD44-CD24+	3	3	1
Her2	T1B	Spleen	NUAK2(1q)	CD44+CD24+	5	4	1.25		TNBC	TNBC1_LN	ITGA8(10p)	CD44-CD24+	3	2	1.5
Her2	T1B	Spleen	NUAK2(1q)	CD44+CD24+	3	3	1		TNBC	TNBC1_LN	ITGA8(10p)	CD44-CD24+	1	1	1
Her2	T1B	Spleen	NUAK2(1q)	CD44+CD24+	1	2	0.5		TNBC	TNBC1_LN	ITGA8(10p)	CD44-CD24+	2	3	0.666667
Her2	T1B	Spleen	NUAK2(1q)	CD44+CD24+	7	4	1.75		TNBC	TNBC1_LN	ITGA8(10p)	CD44-CD24+	1	1	1
Her2	T1B	Spleen	NUAK2(1q)	CD44+CD24+	4	3	1.33333		TNBC	TNBC1_LN	ITGA8(10p)	CD44-CD24+	1	1	1
Her2	T1B	Spleen	NUAK2(1q)	CD44+CD24+	5	4	1.25		TNBC	TNBC1_LN	ITGA8(10p)	CD44-CD24+	1	1	1
Her2	T1B	Spleen	NUAK2(1q)	CD44+CD24+	4	3	1.33333		TNBC	TNBC1_LN	ITGA8(10p)	CD44-CD24-	2	3	0.666667
Her2	T1B	Spleen	NUAK2(1q)	CD44+CD24+	1	1	1		TNBC	TNBC1_LN	ITGA8(10p)	CD44-CD24-	2	2	1
Her2	T1B	Spleen	NUAK2(1q)	CD44+CD24+	10	7	1.42857		TNBC	TNBC1_LN	ITGA8(10p)	CD44-CD24-	1	1	1
Her2	T1B	Spleen	NUAK2(1q)	CD44+CD24+	4	4	1		TNBC	TNBC1_LN	ITGA8(10p)	CD44-CD24-	1	1	1
Her2	T1B	Spleen	NUAK2(1q)	CD44+CD24+	4	4	1		TNBC	TNBC1_LN	ITGA8(10p)	CD44-CD24-	1	1	1
Her2	T1B	Spleen	NUAK2(1q)	CD44+CD24+	3	5	0.6		TNBC	TNBC1_LN	ITGA8(10p)	CD44-CD24-	2	1	2
Her2	T1B	Spleen	NUAK2(1q)	CD44+CD24+	4	7	0.571429		TNBC	TNBC1_LN	ITGA8(10p)	CD44-CD24-	2	2	1
Her2	T1B	Spleen	NUAK2(1q)	CD44+CD24+	4	4	1		TNBC	TNBC1_LN	ITGA8(10p)	CD44-CD24-	2	2	1
Her2	T1B	Spleen	NUAK2(1q)	CD44+CD24+	8	4	2		TNBC	TNBC1_LN	ITGA8(10p)	CD44-CD24-	2	2	1
Her2	T1B	Spleen	NUAK2(1q)	CD44+CD24+	4	2	2		TNBC	TNBC1_LN	ITGA8(10p)	CD44-CD24-	1	1	1
Her2	T1B	Spleen	NUAK2(1q)	CD44+CD24+	4	2	2		TNBC	TNBC1_LN	ITGA8(10p)	CD44-CD24-	2	2	1
Her2	T1B	Spleen	NUAK2(1q)	CD44+CD24+	2	2	1		TNBC	TNBC1_LN	ITGA8(10p)	CD44-CD24-	1	1	1
Her2	T1B	Spleen	NUAK2(1q)	CD44+CD24+	4	5	0.8		TNBC	TNBC1_LN	ITGA8(10p)	CD44-CD24-	1	2	0.5
Her2	T1B	Spleen	NUAK2(1q)	CD44+CD24+	2	1	2		TNBC	TNBC1_LN	ITGA8(10p)	CD44-CD24-	0	1	0
Her2	T1B	Spleen	NUAK2(1q)	CD44+CD24+	4	2	2		TNBC	TNBC1_LN	ITGA8(10p)	CD44-CD24-	0	1	0
Her2	T1B	Spleen	NUAK2(1q)	CD44+CD24+	4	3	1.33333		TNBC	TNBC1_LN	ITGA8(10p)	CD44-CD24-	1	1	1
Her2	T1B	Spleen	NUAK2(1q)	CD44+CD24+	2	1	2		TNBC	TNBC1_LN	ITGA8(10p)	CD44-CD24-	1	1	1
Her2	T1B	Spleen	NUAK2(1q)	CD44+CD24+	4	2	2		TNBC	TNBC1_LN	ITGA8(10p)	CD44-CD24-	1	1	1
Her2	T1B	Spleen	NUAK2(1q)	CD44+CD24+	2	2	1		TNBC	TNBC1_LN	ITGA8(10p)	CD44-CD24-	2	2	1
Her2	T1B	Spleen	NUAK2(1q)	CD44+CD24+	13	10	1.3		TNBC	TNBC1_LN	ITGA8(10p)	CD44-CD24-	3	2	1.5
Her2	T1B	Spleen	NUAK2(1q)	CD44+CD24+	5	2	2.5		TNBC	TNBC1_LN	ITGA8(10p)	CD44-CD24-	2	1	2
Her2	T1B	Spleen	NUAK2(1q)	CD44+CD24+	5	6	0.833333		TNBC	TNBC1_LN	ITGA8(10p)	CD44-CD24-	2	2	1
Her2	T1B	Spleen	NUAK2(1q)	CD44+CD24+	2	1	2		TNBC	TNBC1_LN	ITGA8(10p)	CD44-CD24-	2	3	0.666667
Her2	T1B	Spleen	NUAK2(1q)	CD44+CD24+	2	3	0.666667		TNBC	TNBC1_LN	ITGA8(10p)	CD44-CD24-	1	1	1
Her2	T1B	Spleen	NUAK2(1q)	CD44+CD24+	5	2	2.5		TNBC	TNBC1_LN	ITGA8(10p)	CD44-CD24-	1	1	1
Her2	T1B	Spleen	NUAK2(1q)	CD44+CD24+	2	3	0.666667		TNBC	TNBC1_LN	ITGA8(10p)	CD44-CD24-	1	1	1
Her2	T1B	Spleen	NUAK2(1q)	CD44+CD24+	3	3	1		TNBC	TNBC1_LN	ITGA8(10p)	CD44-CD24-	0	1	0
Her2	T1B	Spleen	NUAK2(1q)	CD44+CD24+	5	2	2.5		TNBC	TNBC1_LN	ITGA8(10p)	CD44-CD24-	2	2	1
Her2	T1B	Spleen	NUAK2(1q)	CD44+CD24+	3	2	1.5		TNBC	TNBC1_LN	ITGA8(10p)	CD44-CD24-	2	2	1
Her2	T1B	Spleen	NUAK2(1q)	CD44+CD24+	3	3	1		TNBC	TNBC1_LN	ITGA8(10p)	CD44-CD24-	1	1	1
Her2	T1B	Spleen	NUAK2(1q)	CD44+CD24+	0	1	0		TNBC	TNBC1_LN	ITGA8(10p)	CD44-CD24-	0	2	0
Her2	T1B	Spleen	NUAK2(1q)	CD44+CD24+	2	4	0.5		TNBC	TNBC1_LN	ITGA8(10p)	CD44-CD24-	0	1	0
Her2	T1B	Spleen	NUAK2(1q)	CD44+CD24+	4	4	1		TNBC	TNBC1_LN	ITGA8(10p)	CD44-CD24-	1	2	0.5
Her2	T1B	Spleen	NUAK2(1q)	CD44+CD24+	2	3	0.666667		TNBC	TNBC1_LN	ITGA8(10p)	CD44-CD24-	1	2	0.5
Her2	T1B	Spleen	NUAK2(1q)	CD44+CD24+	1	2	0.5		TNBC	TNBC1_LN	ITGA8(10p)	CD44-CD24-	1	1	1
Her2	T1B	Spleen	NUAK2(1q)	CD44+CD24+	5	1	5		TNBC	TNBC1_LN	ITGA8(10p)	CD44-CD24-	1	1	1
Her2	T1B	Spleen	NUAK2(1q)	CD44+CD24+	2	1	2		TNBC	TNBC1_LN	ITGA8(10p)	CD44-CD24-	0	1	0
Her2	T1B	Spleen	NUAK2(1q)	CD44+CD24+	5	1	5		TNBC	TNBC1_LN	ITGA8(10p)	CD44-CD24-	0	1	0
Her2	T1B	Spleen	NUAK2(1q)	CD44+CD24+	2	3	0.666667		TNBC	TNBC1_LN	ITGA8(10p)	CD44-CD24-	0	1	0
Her2	T1B	Spleen	NUAK2(1q)	CD44+CD24+	3	3	1		TNBC	TNBC1_LN	ITGA8(10p)	CD44-CD24-	1	1	1
Her2	T1B	Spleen	NUAK2(1q)	CD44-CD24+	2	3	0.666667		TNBC	TNBC1_LN	ITGA8(10p)	CD44-CD24-	2	2	1
Her2	T1B	Spleen	NUAK2(1q)	CD44-CD24+	2	7	0.285714		TNBC	TNBC1_LN	ITGA8(10p)	CD44-CD24-	0	1	0
Her2	T1B	Spleen	NUAK2(1q)	CD44-CD24+	1	2	0.5		TNBC	TNBC1_LN	ITGA8(10p)	CD44-CD24-	2	1	2
Her2	T1B	Spleen	NUAK2(1q)	CD44-CD24+	3	3	1		TNBC	TNBC1_LN	ITGA8(10p)	CD44-CD24-	2	2	1
Her2	T1B	Spleen	NUAK2(1q)	CD44-CD24+	2	4	0.5		TNBC	TNBC1_LN	ITGA8(10p)	CD44-CD24-	1	2	0.5
Her2	T1B	Spleen	NUAK2(1q)	CD44-CD24+	5	4	1.25		TNBC	TNBC1_LN	ITGA8(10p)	CD44-CD24-	2	2	1
Her2	T1B	Spleen	NUAK2(1q)	CD44-CD24+	2	3	0.666667		TNBC	TNBC1_LN	ITGA8(10p)	CD44-CD24-	3	3	1
Her2	T1B	Spleen	NUAK2(1q)	CD44-CD24+	3	4	0.75		TNBC	TNBC1_LN	ITGA8(10p)	CD44-CD24-	2	3	0.666667
Her2	T1B	Spleen	NUAK2(1q)	CD44-CD24+	6	5	1.2		TNBC	TNBC1_LN	ITGA8(10p)	CD44-CD24-	1	1	1
Her2	T1B	Spleen	NUAK2(1q)	CD44-CD24+	5	4	1.25		TNBC	TNBC1_LN	ITGA8(10p)	CD44-CD24-	1	1	1
Her2	T1B	Spleen	NUAK2(1q)	CD44-CD24+	5	3	1.66667		TNBC	TNBC1_LN	ITGA8(10p)	CD44-CD24-	1	1	1
Her2	T1B	Spleen	NUAK2(1q)	CD44-CD24+	1	1	1		TNBC	TNBC1_LN	ITGA8(10p)	CD44-CD24-	1	1	1
Her2	T1B	Spleen	NUAK2(1q)	CD44-CD24+	2	2	1		TNBC	TNBC1_LN	ITGA8(10p)	CD44-CD24-	0	1	0
Her2	T1B	Spleen	NUAK2(1q)	CD44-CD24+	1	1	1		TNBC	TNBC1_LN	ITGA8(10p)	CD44-CD24-	1	2	0.5
Her2	T1B	Spleen	NUAK2(1q)	CD44-CD24+	2	1	2		TNBC	TNBC1_LN	ITGA8(10p)	CD44-CD24-	1	1	1
Her2	T1B	Spleen	NUAK2(1q)	CD44-CD24+	2	3	0.666667		TNBC	TNBC1_LN	ITGA8(10p)	CD44-CD24-	3	1	3
Her2	T1B	Spleen	NUAK2(1q)	CD44-CD24+	8	4	2		TNBC	TNBC1_LN	ITGA8(10p)	CD44-CD24-	2	2	1
Her2	T1B	Spleen	NUAK2(1q)	CD44-CD24+	4	2	2		TNBC	TNBC1_LN	ITGA8(10p)	CD44-CD24-	2	1	2
Her2	T1B	Spleen	NUAK2(1q)	CD44-CD24+	4	3	1.33333		TNBC	TNBC1_LN	ITGA8(10p)	CD44-CD24-	1	2	0.5
Her2	T1B	Spleen	NUAK2(1q)	CD44-CD24+	8	1	8		TNBC	TNBC1_LN	ITGA8(10p)	CD44-CD24-	2	2	1
Her2	T1B	Spleen	NUAK2(1q)	CD44-CD24+	2	2	1		TNBC	TNBC1_LN	ITGA8(10p)	CD44-CD24-	1	1	1
Her2	T1B	Spleen	NUAK2(1q)	CD44-CD24+	2	3	0.666667		TNBC	TNBC1_LN	ITGA8(10p)	CD44-CD24-	1	1	1
Her2	T1B	Spleen	NUAK2(1q)	CD44-CD24+	5	3	1.66667		TNBC	TNBC1_LN	ITGA8(10p)	CD44-CD24-	0	1	0
Her2	T1B	Spleen	NUAK2(1q)	CD44-CD24+	4	1	4		TNBC	TNBC1_LN	ITGA8(10p)	CD44-CD24-	1	1	1
Her2	T1B	Spleen	NUAK2(1q)	CD44-CD24+	8	3	2.66667		TNBC	TNBC1_LN	ITGA8(10p)	CD44-CD24-	1	2	0.5
Her2	T1B	Spleen	NUAK2(1q)	CD44-CD24+	5	4	1.25		TNBC	TNBC1_LN	ITGA8(10p)	CD44-CD24-	0	2	0
Her2	T1B	Spleen	NUAK2(1q)	CD44-CD24+	6	4	1.5		TNBC	TNBC1_LN	ITGA8(10p)	CD44-CD24-	0	1	0
Her2	T1B	Spleen	NUAK2(1q)	CD44-CD24+	5	4	1.25		TNBC	TNBC1_LN	ITGA8(10p)	CD44-CD24-	0	1	0
Her2	T1B	Spleen	NUAK2(1q)	CD44-CD24+	6	4	1.5		TNBC	TNBC1_LN	ITGA8(10p)	CD44-CD24-	1	1	1
Her2	T1B	Spleen	NUAK2(1q)	CD44-CD24+	3	2	1.5		TNBC	TNBC1_LN	ITGA8(10p)	CD44-CD24-	1	2	0.5
Her2	T1B	Spleen	NUAK2(1q)	CD44-CD24+	3	2	1.5		TNBC	TNBC1_LN	ITGA8(10p)	CD44-CD24-	1	1	1
Her2	T1B	Spleen	NUAK2(1q)	CD44-CD24+	1	1	1		TNBC	TNBC1_LN	ITGA8(10p)	CD44-CD24-	0	1	0
Her2	T1B	Spleen	NUAK2(1q)	CD44-CD24+	1	1	1		TNBC	TNBC1_LN	ITGA8(10p)	CD44-CD24-	1	2	0.5
Her2	T1B	Spleen	NUAK2(1q)	CD44-CD24+	5	2	2.5		TNBC	TNBC1_LN	ITGA8(10p)	CD44-CD24-	3	5	0.6
Her2	T1B	Spleen	NUAK2(1q)	CD44-CD24+	6	4	1.5		TNBC	TNBC1_LN	ITGA8(10p)	CD44-CD24-	1	1	1
Her2	T1B	Spleen	NUAK2(1q)	CD44-CD24+	5	6	0.833333		TNBC	TNBC1_LN	ITGA8(10p)	CD44-CD24-	1	3	0.333333
Her2	T1B	Spleen	NUAK2(1q)	CD44-CD24+	2	1	2		TNBC	TNBC1_LN	ITGA8(10p)	CD44-CD24-	1	1	1
Her2	T1B	Spleen	NUAK2(1q)	CD44-CD24+	2	2	1		TNBC	TNBC1_LN	ITGA8(10p)	CD44-CD24-	2	1	2
Her2	T1B	Spleen	NUAK2(1q)	CD44-CD24+	3	3	1		TNBC	TNBC1_LN	ITGA8(10p)	CD44-CD24-	2	1	2
Her2	T1B	Spleen	NUAK2(1q)	CD44-CD24+	6	3	2		TNBC	TNBC1_LN	ITGA8(10p)	CD44-CD24-	0	1	0
Her2	T1B	Spleen	NUAK2(1q)	CD44-CD24+	2	2	1		TNBC	TNBC1_LN	ITGA8(10p)	CD44-CD24-	3	2	1.5
Her2	T1B	Spleen	NUAK2(1q)	CD44-CD24+	4	3	1.33333		TNBC	TNBC1_LN	ITGA8(10p)	CD44-CD24-	2	2	1
Her2	T1B	Spleen	NUAK2(1q)	CD44-CD24+	4	2	2		TNBC	TNBC1_LN	ITGA8(10p)	CD44-CD24-	2	2	1
Her2	T1B	Spleen	NUAK2(1q)	CD44-CD24+	4	3	1.33333		TNBC	TNBC1_LN	ITGA8(10p)	CD44-CD24-	2	2	1
Her2	T1B	Spleen	NUAK2(1q)	CD44-CD24+	2	3	0.666667		TNBC	TNBC1_LN	ITGA8(10p)	CD44-CD24-	1	1	1
Her2	T1B	Spleen	NUAK2(1q)	CD44-CD24+	2	2	1		TNBC	TNBC1_LN	ITGA8(10p)	CD44-CD24-	2	2	1
Her2	T1B	Spleen	NUAK2(1q)	CD44-CD24+	1	1	1		TNBC	TNBC1_LN	ITGA8(10p)	CD44-CD24-	1	1	1
Her2	T1B	Spleen	NUAK2(1q)	CD44-CD24+	5	1	5		TNBC	TNBC1_LN	ITGA8(10p)	CD44-CD24-	1	1	1
Her2	T1B	Spleen	NUAK2(1q)	CD44-CD24+	2	1	2		TNBC	TNBC1_LN	ITGA8(10p)	CD44-CD24-	0	1	0
Her2	T1B	Spleen	NUAK2(1q)	CD44-CD24+	3	2	1.5		TNBC	TNBC1_LN	ITGA8(10p)	CD44-CD24-	2	1	2
Her2	T1B	Spleen	NUAK2(1q)	CD44-CD24+	2	1	2		TNBC	TNBC1_LN	ITGA8(10p)	CD44-CD24-	2	2	1
Her2	T1B	Spleen	NUAK2(1q)	CD44-CD24+	2	2	1		TNBC	TNBC1_LN	ITGA8(10p)	CD44-CD24-	1	1	1
Her2	T1B	Spleen	NUAK2(1q)	CD44-CD24+	3	1	3		TNBC	TNBC1_LN	ITGA8(10p)	CD44-CD24-	1	1	1
Her2	T1B	Spleen	NUAK2(1q)	CD44-CD24+	2	2	1		TNBC	TNBC1_LN	ITGA8(10p)	CD44-CD24-	1	1	1
Her2	T1B	Spleen	NUAK2(1q)	CD44-CD24+	1	1	1		TNBC	TNBC1_LN	ITGA8(10p)	CD44-CD24-	2	2	1
Her2	T1B	Spleen	NUAK2(1q)	CD44-CD24+	3	1	3		TNBC	TNBC1_LN	ITGA8(10p)	CD44-CD24-	1	1	1
Her2	T1B	Spleen	NUAK2(1q)	CD44-CD24+	5	3	1.66667		TNBC	TNBC1_LN	ITGA8(10p)	CD44-CD24-	1	1	1
Her2	T1B	Spleen	NUAK2(1q)	CD44-CD24+	4	3	1.33333		TNBC	TNBC1_LN	ITGA8(10p)	CD44-CD24-	1	1	1
Her2	T1B	Spleen	NUAK2(1q)	CD44-CD24+	3	1	3		TNBC	TNBC1_LN	ITGA8(10p)	CD44-CD24-	2	2	1
Her2	T1B	Spleen	NUAK2(1q)	CD44-CD24+	5	6	0.833333		TNBC	TNBC1_LN	ITGA8(10p)	CD44-CD24-	1	1	1
Her2	T1B	Spleen	NUAK2(1q)	CD44-CD24+	5	1	5		TNBC	TNBC1_LN	621K(8q)	CD44-CD24+	1	1	1
Her2	T1B	Spleen	NUAK2(1q)	CD44-CD24+	3	3	1		TNBC	TNBC1_LN	621K(8q)	CD44-CD24+	2	2	1
Her2	T1B	Spleen	NUAK2(1q)	CD44-CD24+	3	1	3		TNBC	TNBC1_LN	621K(8q)	CD44-CD24+	1	1	1
Her2	T1B	Spleen	NUAK2(1q)	CD44-CD24+	2	2	1		TNBC	TNBC1_LN	621K(8q)	CD44-CD24+	3	1	3
Her2	T1B	Spleen	NUAK2(1q)	CD44-CD24+	5	1	5		TNBC	TNBC1_LN	621K(8q)	CD44-CD24+	2	2	1
Her2	T1B	Spleen	NUAK2(1q)	CD44-CD24+	2	1	2		TNBC	TNBC1_LN	621K(8q)	CD44-CD24+	0	2	0
Her2	T1B	Spleen	NUAK2(1q)	CD44-CD24+	5	2	2.5		TNBC	TNBC1_LN	621K(8q)	CD44-CD24+	2	2	1
Her2	T1B	Spleen	NUAK2(1q)	CD44-CD24+	3	1	3		TNBC	TNBC1_LN	621K(8q)	CD44-CD24+	3	2	1.5
Her2	T1B	Spleen	NUAK2(1q)	CD44-CD24+	4	5	0.8		TNBC	TNBC1_LN	621K(8q)	CD44-CD24+	1	1	1
Her2	T1B	Spleen	NUAK2(1q)	CD44-CD24+	3	2	1.5		TNBC	TNBC1_LN	621K(8q)	CD44-CD24+	0	1	0
Her2	T1B	Spleen	NUAK2(1q)	CD44-CD24+	3	3	1		TNBC	TNBC1_LN	621K(8q)	CD44-CD24+	1	1	1
Her2	T1B	Spleen	NUAK2(1q)	CD44-CD24+	4	1	4		TNBC	TNBC1_LN	621K(8q)	CD44-CD24+	1	1	1
Her2	T1B	Spleen	NUAK2(1q)	CD44-CD24+	5	4	1.25		TNBC	TNBC1_LN	621K(8q)	CD44-CD24+	5	2	2.5
Her2	T1B	Spleen	NUAK2(1q)	CD44-CD24+	6	3	2		TNBC	TNBC1_LN	621K(8q)	CD44-CD24+	2	1	2
Her2	T1B	Spleen	NUAK2(1q)	CD44-CD24+	3	4	0.75		TNBC	TNBC1_LN	621K(8q)	CD44-CD24+	0	1	0
Her2	T1B	Spleen	NUAK2(1q)	CD44-CD24+	4	4	1		TNBC	TNBC1_LN	621K(8q)	CD44-CD24+	1	1	1
Her2	T1B	Spleen	NUAK2(1q)	CD44-CD24+	1	2	0.5		TNBC	TNBC1_LN	621K(8q)	CD44-CD24+	4	2	2
Her2	T1B	Spleen	NUAK2(1q)	CD44-CD24+	2	1	2		TNBC	TNBC1_LN	621K(8q)	CD44-CD24+	2	2	1
Her2	T1B	Spleen	NUAK2(1q)	CD44-CD24+	2	4	0.5		TNBC	TNBC1_LN	621K(8q)	CD44-CD24+	3	2	1.5
Her2	T1B	Spleen	NUAK2(1q)	CD44-CD24+	3	2	1.5		TNBC	TNBC1_LN	621K(8q)	CD44-CD24+	2	2	1
Her2	T1B	Spleen	NUAK2(1q)	CD44-CD24+	8	2	4		TNBC	TNBC1_LN	621K(8q)	CD44-CD24+	3	2	1.5
Her2	T1B	Spleen	NUAK2(1q)	CD44-CD24+	4	3	1.33333		TNBC	TNBC1_LN	621K(8q)	CD44-CD24+	3	3	1
Her2	T1B	Spleen	NUAK2(1q)	CD44-CD24+	4	4	1		TNBC	TNBC1_LN	621K(8q)	CD44-CD24+	1	1	1
Her2	T1B	Spleen	NUAK2(1q)	CD44-CD24+	2	2	1		TNBC	TNBC1_LN	621K(8q)	CD44-CD24+	2	1	2
Her2	T1B	Spleen	NUAK2(1q)	CD44-CD24+	2	2	1		TNBC	TNBC1_LN	621K(8q)	CD44-CD24+	2	1	2
Her2	T1B	Spleen	NUAK2(1q)	CD44-CD24+	6	4	1.5		TNBC	TNBC1_LN	621K(8q)	CD44-CD24+	2	1	2
Her2	T1B	Spleen	NUAK2(1q)	CD44-CD24+	5	7	0.714286		TNBC	TNBC1_LN	621K(8q)	CD44-CD24+	3	2	1.5
Her2	T1B	Spleen	NUAK2(1q)	CD44-CD24+	3	2	1.5		TNBC	TNBC1_LN	621K(8q)	CD44-CD24+	2	2	1
Her2	T1B	Spleen	NUAK2(1q)	CD44-CD24+	2	2	1		TNBC	TNBC1_LN	621K(8q)	CD44-CD24+	3	2	1.5
Her2	T1B	Spleen	NUAK2(1q)	CD44-CD24+	6	5	1.2		TNBC	TNBC1_LN	621K(8q)	CD44-CD24+	2	2	1
Her2	T1B	Spleen	NUAK2(1q)	CD44-CD24+	6	4	1.5		TNBC	TNBC1_LN	621K(8q)	CD44-CD24+	4	2	2
Her2	T1B	Spleen	NUAK2(1q)	CD44-CD24+	2	2	1		TNBC	TNBC1_LN	621K(8q)	CD44-CD24+	3	2	1.5
Her2	T1B	Spleen	NUAK2(1q)	CD44-CD24+	4	2	2		TNBC	TNBC1_LN	621K(8q)	CD44-CD24+	1	1	1
Her2	T1B	Spleen	NUAK2(1q)	CD44-CD24+	2	1	2		TNBC	TNBC1_LN	621K(8q)	CD44-CD24+	1	1	1
Her2	T1B	Spleen	NUAK2(1q)	CD44-CD24+	2	1	2		TNBC	TNBC1_LN	621K(8q)	CD44-CD24+	0	2	0
Her2	T1B	Spleen	NUAK2(1q)	CD44-CD24+	3	5	0.6		TNBC	TNBC1_LN	621K(8q)	CD44-CD24+	1	2	0.5
Her2	T1B	Spleen	NUAK2(1q)	CD44-CD24+	3	2	1.5		TNBC	TNBC1_LN	621K(8q)	CD44-CD24+	4	2	2
Her2	T1B	Spleen	NUAK2(1q)	CD44-CD24+	6	6	1		TNBC	TNBC1_LN	621K(8q)	CD44-CD24+	2	2	1
Her2	T1B	Spleen	NUAK2(1q)	CD44-CD24+	3	2	1.5		TNBC	TNBC1_LN	621K(8q)	CD44-CD24+	2	1	2
Her2	T1B	Spleen	NUAK2(1q)	CD44-CD24+	4	2	2		TNBC	TNBC1_LN	621K(8q)	CD44-CD24+	1	1	1
Her2	T1B	Spleen	NUAK2(1q)	CD44-CD24-	2	4	0.5		TNBC	TNBC1_LN	621K(8q)	CD44-CD24+	2	2	1
Her2	T1B	Spleen	NUAK2(1q)	CD44-CD24-	2	1	2		TNBC	TNBC1_LN	621K(8q)	CD44-CD24+	2	1	2
Her2	T1B	Spleen	NUAK2(1q)	CD44-CD24-	4	1	4		TNBC	TNBC1_LN	621K(8q)	CD44-CD24+	1	1	1
Her2	T1B	Spleen	NUAK2(1q)	CD44-CD24-	3	1	3		TNBC	TNBC1_LN	621K(8q)	CD44-CD24+	2	3	0.666667
Her2	T1B	Spleen	NUAK2(1q)	CD44-CD24-	3	2	1.5		TNBC	TNBC1_LN	621K(8q)	CD44-CD24+	2	1	2
Her2	T1B	Spleen	NUAK2(1q)	CD44-CD24-	4	1	4		TNBC	TNBC1_LN	621K(8q)	CD44-CD24+	2	2	1
Her2	T1B	Spleen	NUAK2(1q)	CD44-CD24-	2	1	2		TNBC	TNBC1_LN	621K(8q)	CD44-CD24+	0	1	0
Her2	T1B	Spleen	NUAK2(1q)	CD44-CD24-	2	1	2		TNBC	TNBC1_LN	621K(8q)	CD44-CD24+	1	1	1
Her2	T1B	Spleen	NUAK2(1q)	CD44-CD24-	3	2	1.5		TNBC	TNBC1_LN	621K(8q)	CD44-CD24+	3	1	3
Her2	T1B	Spleen	NUAK2(1q)	CD44-CD24-	4	3	1.33333		TNBC	TNBC1_LN	621K(8q)	CD44-CD24+	3	2	1.5
Her2	T1B	Spleen	NUAK2(1q)	CD44-CD24-	5	3	1.66667		TNBC	TNBC1_LN	621K(8q)	CD44-CD24+	3	1	3
Her2	T1B	Spleen	NUAK2(1q)	CD44-CD24-	3	1	3		TNBC	TNBC1_LN	621K(8q)	CD44-CD24+	1	1	1
Her2	T1B	Spleen	NUAK2(1q)	CD44-CD24-	2	2	1		TNBC	TNBC1_LN	621K(8q)	CD44-CD24+	2	1	2
Her2	T1B	Spleen	NUAK2(1q)	CD44-CD24-	1	1	1		TNBC	TNBC1_LN	621K(8q)	CD44-CD24+	3	1	3
Her2	T1B	Spleen	NUAK2(1q)	CD44-CD24-	1	1	1		TNBC	TNBC1_LN	621K(8q)	CD44-CD24+	3	4	0.75
Her2	T1B	Spleen	NUAK2(1q)	CD44-CD24-	4	3	1.33333		TNBC	TNBC1_LN	621K(8q)	CD44-CD24+	2	1	2
Her2	T1B	Spleen	NUAK2(1q)	CD44-CD24-	4	1	4		TNBC	TNBC1_LN	621K(8q)	CD44-CD24+	2	3	0.666667
Her2	T1B	Spleen	NUAK2(1q)	CD44-CD24-	2	2	1		TNBC	TNBC1_LN	621K(8q)	CD44-CD24+	4	4	1
Her2	T1B	Spleen	NUAK2(1q)	CD44-CD24-	1	1	1		TNBC	TNBC1_LN	621K(8q)	CD44-CD24+	0	1	0
Her2	T1B	Spleen	NUAK2(1q)	CD44-CD24-	3	3	1		TNBC	TNBC1_LN	621K(8q)	CD44-CD24+	3	1	3
Her2	T1B	Spleen	NUAK2(1q)	CD44-CD24-	2	1	2		TNBC	TNBC1_LN	621K(8q)	CD44-CD24+	2	2	1
Her2	T1B	Spleen	NUAK2(1q)	CD44-CD24-	2	2	1		TNBC	TNBC1_LN	621K(8q)	CD44-CD24+	3	3	1
Her2	T1B	Spleen	NUAK2(1q)	CD44-CD24-	1	1	1		TNBC	TNBC1_LN	621K(8q)	CD44-CD24+	2	1	2
Her2	T1B	Spleen	NUAK2(1q)	CD44-CD24-	4	4	1		TNBC	TNBC1_LN	621K(8q)	CD44-CD24+	1	1	1
Her2	T1B	Spleen	NUAK2(1q)	CD44-CD24-	3	2	1.5		TNBC	TNBC1_LN	621K(8q)	CD44-CD24+	1	1	1
Her2	T1B	Spleen	NUAK2(1q)	CD44-CD24-	6	5	1.2		TNBC	TNBC1_LN	621K(8q)	CD44-CD24+	2	2	1
Her2	T1B	Spleen	NUAK2(1q)	CD44-CD24-	4	5	0.8		TNBC	TNBC1_LN	621K(8q)	CD44-CD24+	1	1	1
Her2	T1B	Spleen	NUAK2(1q)	CD44-CD24-	4	3	1.33333		TNBC	TNBC1_LN	621K(8q)	CD44-CD24+	2	2	1
Her2	T1B	Spleen	NUAK2(1q)	CD44-CD24-	2	3	0.666667		TNBC	TNBC1_LN	621K(8q)	CD44-CD24+	2	1	2
Her2	T1B	Spleen	NUAK2(1q)	CD44-CD24-	3	3	1		TNBC	TNBC1_LN	621K(8q)	CD44-CD24+	3	3	1
Her2	T1B	Spleen	NUAK2(1q)	CD44-CD24-	4	2	2		TNBC	TNBC1_LN	621K(8q)	CD44-CD24+	3	2	1.5
Her2	T1B	Spleen	NUAK2(1q)	CD44-CD24-	3	2	1.5		TNBC	TNBC1_LN	621K(8q)	CD44-CD24+	0	1	0
Her2	T1B	Spleen	NUAK2(1q)	CD44-CD24-	5	3	1.66667		TNBC	TNBC1_LN	621K(8q)	CD44-CD24+	1	1	1
Her2	T1B	Spleen	NUAK2(1q)	CD44-CD24-	3	3	1		TNBC	TNBC1_LN	621K(8q)	CD44-CD24+	1	1	1
Her2	T1B	Spleen	NUAK2(1q)	CD44-CD24-	3	3	1		TNBC	TNBC1_LN	621K(8q)	CD44-CD24+	0	1	0
Her2	T1B	Spleen	NUAK2(1q)	CD44-CD24-	6	4	1.5		TNBC	TNBC1_LN	621K(8q)	CD44-CD24+	2	2	1
Her2	T1B	Spleen	NUAK2(1q)	CD44-CD24-	3	4	0.75		TNBC	TNBC1_LN	621K(8q)	CD44-CD24+	3	2	1.5
Her2	T1B	Spleen	NUAK2(1q)	CD44-CD24-	5	2	2.5		TNBC	TNBC1_LN	621K(8q)	CD44-CD24+	3	3	1
Her2	T1B	Spleen	NUAK2(1q)	CD44-CD24-	4	4	1		TNBC	TNBC1_LN	621K(8q)	CD44-CD24+	3	3	1
Her2	T1B	Spleen	NUAK2(1q)	CD44-CD24-	4	2	2		TNBC	TNBC1_LN	621K(8q)	CD44-CD24+	4	2	2
Her2	T1B	Spleen	NUAK2(1q)	CD44-CD24-	3	3	1		TNBC	TNBC1_LN	621K(8q)	CD44-CD24+	4	2	2
Her2	T1B	Spleen	NUAK2(1q)	CD44-CD24-	3	2	1.5		TNBC	TNBC1_LN	621K(8q)	CD44-CD24+	4	2	2
Her2	T1B	Spleen	NUAK2(1q)	CD44-CD24-	1	1	1		TNBC	TNBC1_LN	621K(8q)	CD44-CD24+	4	2	2
Her2	T1B	Spleen	NUAK2(1q)	CD44-CD24-	2	2	1		TNBC	TNBC1_LN	621K(8q)	CD44-CD24+	1	2	0.5
Her2	T1B	Spleen	NUAK2(1q)	CD44-CD24-	3	3	1		TNBC	TNBC1_LN	621K(8q)	CD44-CD24+	2	1	2
Her2	T1B	Spleen	NUAK2(1q)	CD44-CD24-	3	2	1.5		TNBC	TNBC1_LN	621K(8q)	CD44-CD24+	2	1	2
Her2	T1B	Spleen	NUAK2(1q)	CD44-CD24-	4	4	1		TNBC	TNBC1_LN	621K(8q)	CD44-CD24+	1	1	1
Her2	T1B	Spleen	NUAK2(1q)	CD44-CD24-	6	5	1.2		TNBC	TNBC1_LN	621K(8q)	CD44-CD24+	5	3	1.66667
Her2	T1B	Spleen	NUAK2(1q)	CD44-CD24-	3	3	1		TNBC	TNBC1_LN	621K(8q)	CD44-CD24+	2	2	1
Her2	T1B	Spleen	NUAK2(1q)	CD44-CD24-	2	3	0.666667		TNBC	TNBC1_LN	621K(8q)	CD44-CD24+	2	2	1
Her2	T1B	Spleen	NUAK2(1q)	CD44-CD24-	2	2	1		TNBC	TNBC1_LN	621K(8q)	CD44-CD24+	3	1	3
Her2	T1B	Spleen	NUAK2(1q)	CD44-CD24-	2	1	2		TNBC	TNBC1_LN	621K(8q)	CD44-CD24+	1	1	1
Her2	T1B	Spleen	NUAK2(1q)	CD44-CD24-	3	2	1.5		TNBC	TNBC1_LN	621K(8q)	CD44-CD24+	3	1	3
Her2	T1B	Spleen	NUAK2(1q)	CD44-CD24-	8	7	1.14286		TNBC	TNBC1_LN	621K(8q)	CD44-CD24+	3	1	3
Her2	T1B	Spleen	NUAK2(1q)	CD44-CD24-	1	1	1		TNBC	TNBC1_LN	621K(8q)	CD44-CD24+	2	2	1
Her2	T1B	Spleen	NUAK2(1q)	CD44-CD24-	3	1	3		TNBC	TNBC1_LN	621K(8q)	CD44-CD24+	1	1	1
Her2	T1B	Spleen	NUAK2(1q)	CD44-CD24-	3	3	1		TNBC	TNBC1_LN	621K(8q)	CD44-CD24+	1	1	1
Her2	T1B	Spleen	NUAK2(1q)	CD44-CD24-	6	3	2		TNBC	TNBC1_LN	621K(8q)	CD44-CD24+	2	1	2
Her2	T1B	Spleen	NUAK2(1q)	CD44-CD24-	2	2	1		TNBC	TNBC1_LN	621K(8q)	CD44-CD24+	3	2	1.5
Her2	T1B	Spleen	NUAK2(1q)	CD44-CD24-	5	2	2.5		TNBC	TNBC1_LN	621K(8q)	CD44-CD24+	0	1	0
Her2	T1B	Spleen	NUAK2(1q)	CD44-CD24-	2	2	1		TNBC	TNBC1_LN	621K(8q)	CD44-CD24-	1	1	1
Her2	T1B	Spleen	NUAK2(1q)	CD44-CD24-	3	1	3		TNBC	TNBC1_LN	621K(8q)	CD44-CD24-	0	1	0
Her2	T1B	Spleen	NUAK2(1q)	CD44-CD24-	2	1	2		TNBC	TNBC1_LN	621K(8q)	CD44-CD24-	1	1	1
Her2	T1B	Spleen	NUAK2(1q)	CD44-CD24-	2	1	2		TNBC	TNBC1_LN	621K(8q)	CD44-CD24-	2	1	2
Her2	T1B	Spleen	NUAK2(1q)	CD44-CD24-	2	1	2		TNBC	TNBC1_LN	621K(8q)	CD44-CD24-	2	1	2
Her2	T1B	Spleen	NUAK2(1q)	CD44-CD24-	3	2	1.5		TNBC	TNBC1_LN	621K(8q)	CD44-CD24-	1	1	1
Her2	T1B	Spleen	NUAK2(1q)	CD44-CD24-	3	3	1		TNBC	TNBC1_LN	621K(8q)	CD44-CD24-	3	1	3
Her2	T1B	Spleen	NUAK2(1q)	CD44-CD24-	4	4	1		TNBC	TNBC1_LN	621K(8q)	CD44-CD24-	2	2	1
Her2	T1B	Spleen	NUAK2(1q)	CD44-CD24-	2	2	1		TNBC	TNBC1_LN	621K(8q)	CD44-CD24-	3	2	1.5
Her2	T1B	Spleen	NUAK2(1q)	CD44-CD24-	2	2	1		TNBC	TNBC1_LN	621K(8q)	CD44-CD24-	2	1	2
Her2	T1B	Spleen	621K8(8q)	CD44+CD24-	1	2	0.5		TNBC	TNBC1_LN	621K(8q)	CD44-CD24-	4	1	4
Her2	T1B	Spleen	621K8(8q)	CD44+CD24-	6	1	6		TNBC	TNBC1_LN	621K(8q)	CD44-CD24-	3	1	3
Her2	T1B	Spleen	621K8(8q)	CD44+CD24-	2	1	2		TNBC	TNBC1_LN	621K(8q)	CD44-CD24-	2	1	2
Her2	T1B	Spleen	621K8(8q)	CD44+CD24-	1	1	1		TNBC	TNBC1_LN	621K(8q)	CD44-CD24-	1	1	1
Her2	T1B	Spleen	621K8(8q)	CD44+CD24-	1	1	1		TNBC	TNBC1_LN	621K(8q)	CD44-CD24-	0	1	0
Her2	T1B	Spleen	621K8(8q)	CD44+CD24-	6	4	1.5		TNBC	TNBC1_LN	621K(8q)	CD44-CD24-	2	1	2
Her2	T1B	Spleen	621K8(8q)	CD44+CD24-	3	2	1.5		TNBC	TNBC1_LN	621K(8q)	CD44-CD24-	2	1	2
Her2	T1B	Spleen	621K8(8q)	CD44+CD24-	1	1	1		TNBC	TNBC1_LN	621K(8q)	CD44-CD24-	2	2	1
Her2	T1B	Spleen	621K8(8q)	CD44+CD24-	2	1	2		TNBC	TNBC1_LN	621K(8q)	CD44-CD24-	2	2	1
Her2	T1B	Spleen	621K8(8q)	CD44+CD24-	6	4	1.5		TNBC	TNBC1_LN	621K(8q)	CD44-CD24-	1	1	1
Her2	T1B	Spleen	621K8(8q)	CD44+CD24-	2	2	1		TNBC	TNBC1_LN	621K(8q)	CD44-CD24-	2	2	1
Her2	T1B	Spleen	621K8(8q)	CD44+CD24-	5	3	1.66667		TNBC	TNBC1_LN	621K(8q)	CD44-CD24-	2	3	0.666667
Her2	T1B	Spleen	621K8(8q)	CD44+CD24-	2	2	1		TNBC	TNBC1_LN	621K(8q)	CD44-CD24-	1	1	1
Her2	T1B	Spleen	621K8(8q)	CD44+CD24-	2	1	2		TNBC	TNBC1_LN	621K(8q)	CD44-CD24-	1	1	1
Her2	T1B	Spleen	621K8(8q)	CD44+CD24-	1	1	1		TNBC	TNBC1_LN	621K(8q)	CD44-CD24-	2	1	2
Her2	T1B	Spleen	621K8(8q)	CD44+CD24-	2	1	2		TNBC	TNBC1_LN	621K(8q)	CD44-CD24-	2	1	2
Her2	T1B	Spleen	621K8(8q)	CD44+CD24-	2	1	2		TNBC	TNBC1_LN	621K(8q)	CD44-CD24-	2	2	1
Her2	T1B	Spleen	621K8(8q)	CD44+CD24-	2	2	1		TNBC	TNBC1_LN	621K(8q)	CD44-CD24-	1	1	1
Her2	T1B	Spleen	621K8(8q)	CD44+CD24-	1	1	1		TNBC	TNBC1_LN	621K(8q)	CD44-CD24-	0	2	0
Her2	T1B	Spleen	621K8(8q)	CD44+CD24-	13	4	3.25		TNBC	TNBC1_LN	621K(8q)	CD44-CD24-	1	1	1
Her2	T1B	Spleen	621K8(8q)	CD44+CD24-	5	3	1.66667		TNBC	TNBC1_LN	621K(8q)	CD44-CD24-	3	1	3
Her2	T1B	Spleen	621K8(8q)	CD44+CD24-	3	2	1.5		TNBC	TNBC1_LN	621K(8q)	CD44-CD24-	0	1	0
Her2	T1B	Spleen	621K8(8q)	CD44+CD24-	7	6	1.16667		TNBC	TNBC1_LN	621K(8q)	CD44-CD24-	1	1	1
Her2	T1B	Spleen	621K8(8q)	CD44+CD24-	12	4	3		TNBC	TNBC1_LN	621K(8q)	CD44-CD24-	2	1	2
Her2	T1B	Spleen	621K8(8q)	CD44+CD24-	5	5	1		TNBC	TNBC1_LN	621K(8q)	CD44-CD24-	2	1	2
Her2	T1B	Spleen	621K8(8q)	CD44+CD24-	2	1	2		TNBC	TNBC1_LN	621K(8q)	CD44-CD24-	0	1	0
Her2	T1B	Spleen	621K8(8q)	CD44+CD24-	10	1	10		TNBC	TNBC1_LN	621K(8q)	CD44-CD24-	1	1	1
Her2	T1B	Spleen	621K8(8q)	CD44+CD24-	6	2	3		TNBC	TNBC1_LN	621K(8q)	CD44-CD24-	1	1	1
Her2	T1B	Spleen	621K8(8q)	CD44+CD24-	5	3	1.66667		TNBC	TNBC1_LN	621K(8q)	CD44-CD24-	1	1	1
Her2	T1B	Spleen	621K8(8q)	CD44+CD24-	3	1	3		TNBC	TNBC1_LN	621K(8q)	CD44-CD24-	1	1	1
Her2	T1B	Spleen	621K8(8q)	CD44+CD24-	1	1	1		TNBC	TNBC1_LN	621K(8q)	CD44-CD24-	3	2	1.5
Her2	T1B	Spleen	621K8(8q)	CD44+CD24-	3	3	1		TNBC	TNBC1_LN	621K(8q)	CD44-CD24-	3	3	1
Her2	T1B	Spleen	621K8(8q)	CD44+CD24-	4	2	2		TNBC	TNBC1_LN	621K(8q)	CD44-CD24-	3	1	3
Her2	T1B	Spleen	621K8(8q)	CD44+CD24-	9	1	9		TNBC	TNBC1_LN	621K(8q)	CD44-CD24-	2	2	1
Her2	T1B	Spleen	621K8(8q)	CD44+CD24-	3	3	1		TNBC	TNBC1_LN	621K(8q)	CD44-CD24-	2	2	1
Her2	T1B	Spleen	621K8(8q)	CD44+CD24-	4	2	2		TNBC	TNBC1_LN	621K(8q)	CD44-CD24-	5	2	2.5
Her2	T1B	Spleen	621K8(8q)	CD44+CD24-	6	3	2		TNBC	TNBC1_LN	621K(8q)	CD44-CD24-	1	1	1
Her2	T1B	Spleen	621K8(8q)	CD44+CD24-	1	2	0.5		TNBC	TNBC1_LN	621K(8q)	CD44-CD24-	2	2	1
Her2	T1B	Spleen	621K8(8q)	CD44+CD24-	3	1	3		TNBC	TNBC1_LN	621K(8q)	CD44-CD24-	1	2	0.5
Her2	T1B	Spleen	621K8(8q)	CD44+CD24-	1	1	1		TNBC	TNBC1_LN	621K(8q)	CD44-CD24-	2	2	1
Her2	T1B	Spleen	621K8(8q)	CD44+CD24-	7	4	1.75		TNBC	TNBC1_LN	621K(8q)	CD44-CD24-	2	2	1
Her2	T1B	Spleen	621K8(8q)	CD44+CD24-	1	2	0.5		TNBC	TNBC1_LN	621K(8q)	CD44-CD24-	2	2	1
Her2	T1B	Spleen	621K8(8q)	CD44+CD24-	1	2	0.5		TNBC	TNBC1_LN	621K(8q)	CD44-CD24-	3	1	3
Her2	T1B	Spleen	621K8(8q)	CD44+CD24-	2	2	1		TNBC	TNBC1_LN	621K(8q)	CD44-CD24-	2	2	1
Her2	T1B	Spleen	621K8(8q)	CD44+CD24-	2	2	1		TNBC	TNBC1_LN	621K(8q)	CD44-CD24-	0	1	0
Her2	T1B	Spleen	621K8(8q)	CD44+CD24-	6	4	1.5		TNBC	TNBC1_LN	621K(8q)	CD44-CD24-	1	1	1
Her2	T1B	Spleen	621K8(8q)	CD44+CD24-	7	4	1.75		TNBC	TNBC1_LN	621K(8q)	CD44-CD24-	4	1	4
Her2	T1B	Spleen	621K8(8q)	CD44+CD24-	6	2	3		TNBC	TNBC1_LN	621K(8q)	CD44-CD24-	1	2	0.5
Her2	T1B	Spleen	621K8(8q)	CD44+CD24-	3	2	1.5		TNBC	TNBC1_LN	621K(8q)	CD44-CD24-	2	1	2
Her2	T1B	Spleen	621K8(8q)	CD44+CD24-	1	1	1		TNBC	TNBC1_LN	621K(8q)	CD44-CD24-	2	1	2
Her2	T1B	Spleen	621K8(8q)	CD44+CD24-	7	3	2.33333		TNBC	TNBC1_LN	621K(8q)	CD44-CD24-	2	2	1
Her2	T1B	Spleen	621K8(8q)	CD44+CD24-	1	1	1		TNBC	TNBC1_LN	621K(8q)	CD44-CD24-	2	2	1
Her2	T1B	Spleen	621K8(8q)	CD44+CD24-	5	1	5		TNBC	TNBC1_LN	621K(8q)	CD44-CD24-	2	1	2
Her2	T1B	Spleen	621K8(8q)	CD44+CD24-	1	1	1		TNBC	TNBC1_LN	621K(8q)	CD44-CD24-	2	1	2
Her2	T1B	Spleen	621K8(8q)	CD44+CD24-	6	2	3		TNBC	TNBC1_LN	621K(8q)	CD44-CD24-	1	2	0.5
Her2	T1B	Spleen	621K8(8q)	CD44+CD24-	1	1	1		TNBC	TNBC1_LN	621K(8q)	CD44-CD24-	0	1	0
Her2	T1B	Spleen	621K8(8q)	CD44+CD24-	1	1	1		TNBC	TNBC1_LN	621K(8q)	CD44-CD24-	1	1	1
Her2	T1B	Spleen	621K8(8q)	CD44+CD24-	6	2	3		TNBC	TNBC1_LN	621K(8q)	CD44-CD24-	3	1	3
Her2	T1B	Spleen	621K8(8q)	CD44+CD24-	1	1	1		TNBC	TNBC1_LN	621K(8q)	CD44-CD24-	1	1	1
Her2	T1B	Spleen	621K8(8q)	CD44+CD24-	1	1	1		TNBC	TNBC1_LN	621K(8q)	CD44-CD24-	1	1	1
Her2	T1B	Spleen	621K8(8q)	CD44+CD24-	6	2	3		TNBC	TNBC1_LN	621K(8q)	CD44-CD24-	2	1	2
Her2	T1B	Spleen	621K8(8q)	CD44+CD24-	2	4	0.5		TNBC	TNBC1_LN	621K(8q)	CD44-CD24-	2	2	1
Her2	T1B	Spleen	621K8(8q)	CD44+CD24-	3	3	1		TNBC	TNBC1_LN	621K(8q)	CD44-CD24-	2	1	2
Her2	T1B	Spleen	621K8(8q)	CD44+CD24-	5	3	1.66667		TNBC	TNBC1_LN	621K(8q)	CD44-CD24-	2	1	2
Her2	T1B	Spleen	621K8(8q)	CD44+CD24-	8	4	2		TNBC	TNBC1_LN	621K(8q)	CD44-CD24-	1	2	0.5
Her2	T1B	Spleen	621K8(8q)	CD44+CD24-	2	4	0.5		TNBC	TNBC1_LN	621K(8q)	CD44-CD24-	2	1	2
Her2	T1B	Spleen	621K8(8q)	CD44+CD24-	6	2	3		TNBC	TNBC1_LN	621K(8q)	CD44-CD24-	1	1	1
Her2	T1B	Spleen	621K8(8q)	CD44+CD24-	2	2	1		TNBC	TNBC1_LN	621K(8q)	CD44-CD24-	1	1	1
Her2	T1B	Spleen	621K8(8q)	CD44+CD24-	2	2	1		TNBC	TNBC1_LN	621K(8q)	CD44-CD24-	1	1	1
Her2	T1B	Spleen	621K8(8q)	CD44+CD24-	6	3	2		TNBC	TNBC1_LN	621K(8q)	CD44-CD24-	2	2	1
Her2	T1B	Spleen	621K8(8q)	CD44+CD24-	3	2	1.5		TNBC	TNBC1_LN	621K(8q)	CD44-CD24-	3	1	3
Her2	T1B	Spleen	621K8(8q)	CD44+CD24-	9	5	1.8		TNBC	TNBC1_LN	621K(8q)	CD44-CD24-	5	2	2.5
Her2	T1B	Spleen	621K8(8q)	CD44+CD24-	2	2	1		TNBC	TNBC1_LN	621K(8q)	CD44-CD24-	2	1	2
Her2	T1B	Spleen	621K8(8q)	CD44+CD24-	6	2	3		TNBC	TNBC1_LN	621K(8q)	CD44-CD24-	3	2	1.5
Her2	T1B	Spleen	621K8(8q)	CD44+CD24-	7	4	1.75		TNBC	TNBC1_LN	621K(8q)	CD44-CD24-	2	1	2
Her2	T1B	Spleen	621K8(8q)	CD44+CD24-	2	2	1		TNBC	TNBC1_LN	621K(8q)	CD44-CD24-	4	2	2
Her2	T1B	Spleen	621K8(8q)	CD44+CD24-	4	3	1.33333		TNBC	TNBC1_LN	621K(8q)	CD44-CD24-	0	1	0
Her2	T1B	Spleen	621K8(8q)	CD44+CD24-	6	1	6		TNBC	TNBC1_LN	621K(8q)	CD44-CD24-	2	1	2
Her2	T1B	Spleen	621K8(8q)	CD44+CD24-	6	4	1.5		TNBC	TNBC1_LN	621K(8q)	CD44-CD24-	2	1	2
Her2	T1B	Spleen	621K8(8q)	CD44+CD24-	3	3	1		TNBC	TNBC1_LN	621K(8q)	CD44-CD24-	2	1	2
Her2	T1B	Spleen	621K8(8q)	CD44+CD24-	4	2	2		TNBC	TNBC1_LN	621K(8q)	CD44-CD24-	2	1	2
Her2	T1B	Spleen	621K8(8q)	CD44+CD24-	2	2	1		TNBC	TNBC1_LN	621K(8q)	CD44-CD24-	0	1	0
Her2	T1B	Spleen	621K8(8q)	CD44+CD24-	3	1	3		TNBC	TNBC1_LN	621K(8q)	CD44-CD24-	1	1	1
Her2	T1B	Spleen	621K8(8q)	CD44+CD24-	6	1	6		TNBC	TNBC1_LN	621K(8q)	CD44-CD24-	2	2	1
Her2	T1B	Spleen	621K8(8q)	CD44+CD24-	6	2	3		TNBC	TNBC1_LN	621K(8q)	CD44-CD24-	1	2	0.5
Her2	T1B	Spleen	621K8(8q)	CD44+CD24-	1	1	1		TNBC	TNBC1_LN	621K(8q)	CD44-CD24-	0	1	0
Her2	T1B	Spleen	621K8(8q)	CD44+CD24-	7	4	1.75		TNBC	TNBC1_LN	621K(8q)	CD44-CD24-	5	1	5
Her2	T1B	Spleen	621K8(8q)	CD44+CD24-	3	1	3		TNBC	TNBC1_LN	621K(8q)	CD44-CD24-	2	2	1
Her2	T1B	Spleen	621K8(8q)	CD44+CD24-	7	3	2.33333		TNBC	TNBC1_LN	621K(8q)	CD44-CD24-	1	1	1
Her2	T1B	Spleen	621K8(8q)	CD44+CD24-	1	1	1		TNBC	TNBC1_LN	621K(8q)	CD44-CD24-	1	1	1
Her2	T1B	Spleen	621K8(8q)	CD44+CD24-	7	7	1		TNBC	TNBC2_PR	H2AFJ(12p)	CK+	2	1	2
Her2	T1B	Spleen	621K8(8q)	CD44+CD24-	5	4	1.25		TNBC	TNBC2_PR	H2AFJ(12p)	CK+	2	1	2
Her2	T1B	Spleen	621K8(8q)	CD44+CD24-	3	2	1.5		TNBC	TNBC2_PR	H2AFJ(12p)	CK+	1	1	1
Her2	T1B	Spleen	621K8(8q)	CD44+CD24-	4	2	2		TNBC	TNBC2_PR	H2AFJ(12p)	CK+	1	1	1
Her2	T1B	Spleen	621K8(8q)	CD44+CD24-	4	2	2		TNBC	TNBC2_PR	H2AFJ(12p)	CK+	2	1	2
Her2	T1B	Spleen	621K8(8q)	CD44+CD24-	5	4	1.25		TNBC	TNBC2_PR	H2AFJ(12p)	CK+	2	3	0.666667
Her2	T1B	Spleen	621K8(8q)	CD44+CD24-	5	4	1.25		TNBC	TNBC2_PR	H2AFJ(12p)	CK+	3	1	3
Her2	T1B	Spleen	621K8(8q)	CD44+CD24-	6	2	3		TNBC	TNBC2_PR	H2AFJ(12p)	CK+	2	1	2
Her2	T1B	Spleen	621K8(8q)	CD44+CD24-	1	1	1		TNBC	TNBC2_PR	H2AFJ(12p)	CK+	3	1	3
Her2	T1B	Spleen	621K8(8q)	CD44+CD24-	7	4	1.75		TNBC	TNBC2_PR	H2AFJ(12p)	CK+	3	1	3
Her2	T1B	Spleen	621K8(8q)	CD44+CD24+	2	1	2		TNBC	TNBC2_PR	H2AFJ(12p)	CK+	1	1	1
Her2	T1B	Spleen	621K8(8q)	CD44+CD24+	3	1	3		TNBC	TNBC2_PR	H2AFJ(12p)	CK+	1	1	1
Her2	T1B	Spleen	621K8(8q)	CD44+CD24+	7	3	2.33333		TNBC	TNBC2_PR	H2AFJ(12p)	CK+	2	2	1
Her2	T1B	Spleen	621K8(8q)	CD44+CD24+	6	3	2		TNBC	TNBC2_PR	H2AFJ(12p)	CK+	1	1	1
Her2	T1B	Spleen	621K8(8q)	CD44+CD24+	4	1	4		TNBC	TNBC2_PR	H2AFJ(12p)	CK+	2	2	1
Her2	T1B	Spleen	621K8(8q)	CD44+CD24+	1	2	0.5		TNBC	TNBC2_PR	H2AFJ(12p)	CK+	1	1	1
Her2	T1B	Spleen	621K8(8q)	CD44+CD24+	3	1	3		TNBC	TNBC2_PR	H2AFJ(12p)	CK+	1	1	1
Her2	T1B	Spleen	621K8(8q)	CD44+CD24+	2	1	2		TNBC	TNBC2_PR	H2AFJ(12p)	CK+	1	1	1
Her2	T1B	Spleen	621K8(8q)	CD44+CD24+	6	3	2		TNBC	TNBC2_PR	H2AFJ(12p)	CK+	2	2	1
Her2	T1B	Spleen	621K8(8q)	CD44+CD24+	6	4	1.5		TNBC	TNBC2_PR	H2AFJ(12p)	CK+	3	3	1
Her2	T1B	Spleen	621K8(8q)	CD44+CD24+	7	4	1.75		TNBC	TNBC2_PR	H2AFJ(12p)	CK+	2	2	1
Her2	T1B	Spleen	621K8(8q)	CD44+CD24+	7	4	1.75		TNBC	TNBC2_PR	H2AFJ(12p)	CK+	4	3	1.33333
Her2	T1B	Spleen	621K8(8q)	CD44+CD24+	5	4	1.25		TNBC	TNBC2_PR	H2AFJ(12p)	CK+	1	1	1
Her2	T1B	Spleen	621K8(8q)	CD44+CD24+	3	3	1		TNBC	TNBC2_PR	H2AFJ(12p)	CK+	1	1	1
Her2	T1B	Spleen	621K8(8q)	CD44+CD24+	4	3	1.33333		TNBC	TNBC2_PR	H2AFJ(12p)	CK+	1	1	1
Her2	T1B	Spleen	621K8(8q)	CD44+CD24+	2	2	1		TNBC	TNBC2_PR	H2AFJ(12p)	CK+	2	2	1
Her2	T1B	Spleen	621K8(8q)	CD44+CD24+	1	3	0.333333		TNBC	TNBC2_PR	H2AFJ(12p)	CK+	1	1	1
Her2	T1B	Spleen	621K8(8q)	CD44+CD24+	5	1	5		TNBC	TNBC2_PR	H2AFJ(12p)	CK+	3	3	1
Her2	T1B	Spleen	621K8(8q)	CD44+CD24+	7	2	3.5		TNBC	TNBC2_PR	H2AFJ(12p)	CK+	2	2	1
Her2	T1B	Spleen	621K8(8q)	CD44+CD24+	14	2	7		TNBC	TNBC2_PR	H2AFJ(12p)	CK+	2	2	1
Her2	T1B	Spleen	621K8(8q)	CD44+CD24+	6	2	3		TNBC	TNBC2_PR	H2AFJ(12p)	CK+	2	1	2
Her2	T1B	Spleen	621K8(8q)	CD44+CD24+	6	1	6		TNBC	TNBC2_PR	H2AFJ(12p)	CK+	2	1	2
Her2	T1B	Spleen	621K8(8q)	CD44+CD24+	5	3	1.66667		TNBC	TNBC2_PR	H2AFJ(12p)	CK+	2	1	2
Her2	T1B	Spleen	621K8(8q)	CD44+CD24+	1	2	0.5		TNBC	TNBC2_PR	H2AFJ(12p)	CK+	1	1	1
Her2	T1B	Spleen	621K8(8q)	CD44+CD24+	3	1	3		TNBC	TNBC2_PR	H2AFJ(12p)	CK+	1	1	1
Her2	T1B	Spleen	621K8(8q)	CD44+CD24+	8	3	2.66667		TNBC	TNBC2_PR	H2AFJ(12p)	CK+	1	1	1
Her2	T1B	Spleen	621K8(8q)	CD44+CD24+	4	1	4		TNBC	TNBC2_PR	H2AFJ(12p)	CK+	1	1	1
Her2	T1B	Spleen	621K8(8q)	CD44+CD24+	1	2	0.5		TNBC	TNBC2_PR	H2AFJ(12p)	CK+	1	2	0.5
Her2	T1B	Spleen	621K8(8q)	CD44+CD24+	2	2	1		TNBC	TNBC2_PR	H2AFJ(12p)	CK+	2	1	2
Her2	T1B	Spleen	621K8(8q)	CD44+CD24+	6	2	3		TNBC	TNBC2_PR	H2AFJ(12p)	CK+	4	3	1.33333
Her2	T1B	Spleen	621K8(8q)	CD44+CD24+	3	3	1		TNBC	TNBC2_PR	H2AFJ(12p)	CK+	2	2	1
Her2	T1B	Spleen	621K8(8q)	CD44+CD24+	2	1	2		TNBC	TNBC2_PR	H2AFJ(12p)	CK+	1	1	1
Her2	T1B	Spleen	621K8(8q)	CD44+CD24+	5	2	2.5		TNBC	TNBC2_PR	H2AFJ(12p)	CK+	2	1	2
Her2	T1B	Spleen	621K8(8q)	CD44+CD24+	6	1	6		TNBC	TNBC2_PR	H2AFJ(12p)	CK+	2	1	2
Her2	T1B	Spleen	621K8(8q)	CD44+CD24+	2	2	1		TNBC	TNBC2_PR	H2AFJ(12p)	CK+	1	1	1
Her2	T1B	Spleen	621K8(8q)	CD44+CD24+	1	1	1		TNBC	TNBC2_PR	H2AFJ(12p)	CK+	1	1	1
Her2	T1B	Spleen	621K8(8q)	CD44+CD24+	2	1	2		TNBC	TNBC2_PR	H2AFJ(12p)	CK+	2	1	2
Her2	T1B	Spleen	621K8(8q)	CD44+CD24+	9	4	2.25		TNBC	TNBC2_PR	H2AFJ(12p)	CK+	2	2	1
Her2	T1B	Spleen	621K8(8q)	CD44+CD24+	1	1	1		TNBC	TNBC2_PR	H2AFJ(12p)	CK+	1	1	1
Her2	T1B	Spleen	621K8(8q)	CD44+CD24+	5	2	2.5		TNBC	TNBC2_PR	H2AFJ(12p)	CK+	1	1	1
Her2	T1B	Spleen	621K8(8q)	CD44+CD24+	3	2	1.5		TNBC	TNBC2_PR	H2AFJ(12p)	CK+	1	1	1
Her2	T1B	Spleen	621K8(8q)	CD44+CD24+	6	3	2		TNBC	TNBC2_PR	H2AFJ(12p)	CK+	1	1	1
Her2	T1B	Spleen	621K8(8q)	CD44+CD24+	2	1	2		TNBC	TNBC2_PR	H2AFJ(12p)	CK+	1	1	1
Her2	T1B	Spleen	621K8(8q)	CD44+CD24+	4	4	1		TNBC	TNBC2_PR	H2AFJ(12p)	CK+	1	1	1
Her2	T1B	Spleen	621K8(8q)	CD44+CD24+	2	3	0.666667		TNBC	TNBC2_PR	H2AFJ(12p)	CK+	2	1	2
Her2	T1B	Spleen	621K8(8q)	CD44+CD24+	2	1	2		TNBC	TNBC2_PR	H2AFJ(12p)	CK+	1	1	1
Her2	T1B	Spleen	621K8(8q)	CD44+CD24+	3	4	0.75		TNBC	TNBC2_PR	H2AFJ(12p)	CK+	1	1	1
Her2	T1B	Spleen	621K8(8q)	CD44+CD24+	3	1	3		TNBC	TNBC2_PR	H2AFJ(12p)	CK+	1	1	1
Her2	T1B	Spleen	621K8(8q)	CD44+CD24+	5	3	1.66667		TNBC	TNBC2_PR	H2AFJ(12p)	CK+	2	1	2
Her2	T1B	Spleen	621K8(8q)	CD44+CD24+	6	2	3		TNBC	TNBC2_PR	H2AFJ(12p)	CK+	1	1	1
Her2	T1B	Spleen	621K8(8q)	CD44+CD24+	5	4	1.25		TNBC	TNBC2_PR	H2AFJ(12p)	CK+	2	2	1
Her2	T1B	Spleen	621K8(8q)	CD44+CD24+	6	2	3		TNBC	TNBC2_PR	H2AFJ(12p)	CK+	1	1	1
Her2	T1B	Spleen	621K8(8q)	CD44+CD24+	3	2	1.5		TNBC	TNBC2_PR	H2AFJ(12p)	CK+	1	1	1
Her2	T1B	Spleen	621K8(8q)	CD44+CD24+	2	2	1		TNBC	TNBC2_PR	H2AFJ(12p)	CK+	1	1	1
Her2	T1B	Spleen	621K8(8q)	CD44+CD24+	4	2	2		TNBC	TNBC2_PR	H2AFJ(12p)	CK+	1	1	1
Her2	T1B	Spleen	621K8(8q)	CD44+CD24+	1	1	1		TNBC	TNBC2_PR	H2AFJ(12p)	CK+	2	2	1
Her2	T1B	Spleen	621K8(8q)	CD44+CD24+	6	2	3		TNBC	TNBC2_PR	H2AFJ(12p)	CK+	1	1	1
Her2	T1B	Spleen	621K8(8q)	CD44+CD24+	3	2	1.5		TNBC	TNBC2_PR	H2AFJ(12p)	CK+	0	1	0
Her2	T1B	Spleen	621K8(8q)	CD44+CD24+	6	3	2		TNBC	TNBC2_PR	H2AFJ(12p)	CK+	1	1	1
Her2	T1B	Spleen	621K8(8q)	CD44+CD24+	8	5	1.6		TNBC	TNBC2_PR	H2AFJ(12p)	CK+	1	1	1
Her2	T1B	Spleen	621K8(8q)	CD44+CD24+	6	3	2		TNBC	TNBC2_PR	H2AFJ(12p)	CK+	1	1	1
Her2	T1B	Spleen	621K8(8q)	CD44+CD24+	8	5	1.6		TNBC	TNBC2_PR	H2AFJ(12p)	CK+	1	2	0.5
Her2	T1B	Spleen	621K8(8q)	CD44+CD24+	6	3	2		TNBC	TNBC2_PR	H2AFJ(12p)	CK+	2	1	2
Her2	T1B	Spleen	621K8(8q)	CD44+CD24+	2	2	1		TNBC	TNBC2_PR	H2AFJ(12p)	CK+	1	1	1
Her2	T1B	Spleen	621K8(8q)	CD44+CD24+	2	2	1		TNBC	TNBC2_PR	H2AFJ(12p)	CK+	0	1	0
Her2	T1B	Spleen	621K8(8q)	CD44+CD24+	5	3	1.66667		TNBC	TNBC2_PR	H2AFJ(12p)	CK+	1	1	1
Her2	T1B	Spleen	621K8(8q)	CD44+CD24+	8	1	8		TNBC	TNBC2_PR	H2AFJ(12p)	CK+	1	2	0.5
Her2	T1B	Spleen	621K8(8q)	CD44+CD24+	1	1	1		TNBC	TNBC2_PR	H2AFJ(12p)	CK+	2	2	1
Her2	T1B	Spleen	621K8(8q)	CD44+CD24+	5	3	1.66667		TNBC	TNBC2_PR	H2AFJ(12p)	CK+	1	1	1
Her2	T1B	Spleen	621K8(8q)	CD44+CD24+	1	1	1		TNBC	TNBC2_PR	H2AFJ(12p)	CK+	2	2	1
Her2	T1B	Spleen	621K8(8q)	CD44+CD24+	8	3	2.66667		TNBC	TNBC2_PR	H2AFJ(12p)	CK+	2	2	1
Her2	T1B	Spleen	621K8(8q)	CD44+CD24+	6	2	3		TNBC	TNBC2_PR	H2AFJ(12p)	CK+	2	1	2
Her2	T1B	Spleen	621K8(8q)	CD44+CD24+	5	6	0.833333		TNBC	TNBC2_PR	H2AFJ(12p)	CK+	4	3	1.33333
Her2	T1B	Spleen	621K8(8q)	CD44+CD24+	2	1	2		TNBC	TNBC2_PR	H2AFJ(12p)	CK+	2	2	1
Her2	T1B	Spleen	621K8(8q)	CD44+CD24+	4	3	1.33333		TNBC	TNBC2_PR	H2AFJ(12p)	CK+	5	4	1.25
Her2	T1B	Spleen	621K8(8q)	CD44+CD24+	3	1	3		TNBC	TNBC2_PR	H2AFJ(12p)	CK+	1	1	1
Her2	T1B	Spleen	621K8(8q)	CD44+CD24+	6	2	3		TNBC	TNBC2_PR	H2AFJ(12p)	CK+	3	3	1
Her2	T1B	Spleen	621K8(8q)	CD44+CD24+	5	1	5		TNBC	TNBC2_PR	H2AFJ(12p)	CK+	3	2	1.5
Her2	T1B	Spleen	621K8(8q)	CD44+CD24+	1	1	1		TNBC	TNBC2_PR	H2AFJ(12p)	CK+	1	1	1
Her2	T1B	Spleen	621K8(8q)	CD44+CD24+	1	1	1		TNBC	TNBC2_PR	H2AFJ(12p)	CK+	1	1	1
Her2	T1B	Spleen	621K8(8q)	CD44+CD24+	5	1	5		TNBC	TNBC2_PR	H2AFJ(12p)	CK+	0	1	0
Her2	T1B	Spleen	621K8(8q)	CD44+CD24+	5	1	5		TNBC	TNBC2_PR	H2AFJ(12p)	CK+	1	1	1
Her2	T1B	Spleen	621K8(8q)	CD44+CD24+	4	2	2		TNBC	TNBC2_PR	H2AFJ(12p)	CK+	2	2	1
Her2	T1B	Spleen	621K8(8q)	CD44+CD24+	2	1	2		TNBC	TNBC2_PR	H2AFJ(12p)	CK+	4	3	1.33333
Her2	T1B	Spleen	621K8(8q)	CD44+CD24+	5	2	2.5		TNBC	TNBC2_PR	H2AFJ(12p)	CK+	2	2	1
Her2	T1B	Spleen	621K8(8q)	CD44+CD24+	4	2	2		TNBC	TNBC2_PR	H2AFJ(12p)	CK+	2	2	1
Her2	T1B	Spleen	621K8(8q)	CD44+CD24+	2	2	1		TNBC	TNBC2_PR	H2AFJ(12p)	CK+	0	1	0
Her2	T1B	Spleen	621K8(8q)	CD44+CD24+	1	1	1		TNBC	TNBC2_PR	H2AFJ(12p)	CK+	2	2	1
Her2	T1B	Spleen	621K8(8q)	CD44+CD24+	2	2	1		TNBC	TNBC2_PR	H2AFJ(12p)	CK+	3	1	3
Her2	T1B	Spleen	621K8(8q)	CD44+CD24+	1	1	1		TNBC	TNBC2_PR	H2AFJ(12p)	CK+	1	1	1
Her2	T1B	Spleen	621K8(8q)	CD44+CD24+	2	2	1		TNBC	TNBC2_PR	ITGA8(10p)	CK+	2	2	1
Her2	T1B	Spleen	621K8(8q)	CD44+CD24+	1	1	1		TNBC	TNBC2_PR	ITGA8(10p)	CK+	1	1	1
Her2	T1B	Spleen	621K8(8q)	CD44+CD24+	5	2	2.5		TNBC	TNBC2_PR	ITGA8(10p)	CK+	1	1	1
Her2	T1B	Spleen	621K8(8q)	CD44+CD24+	8	4	2		TNBC	TNBC2_PR	ITGA8(10p)	CK+	1	1	1
Her2	T1B	Spleen	621K8(8q)	CD44+CD24+	3	2	1.5		TNBC	TNBC2_PR	ITGA8(10p)	CK+	1	1	1
Her2	T1B	Spleen	621K8(8q)	CD44+CD24+	8	2	4		TNBC	TNBC2_PR	ITGA8(10p)	CK+	2	1	2
Her2	T1B	Spleen	621K8(8q)	CD44+CD24+	7	2	3.5		TNBC	TNBC2_PR	ITGA8(10p)	CK+	1	1	1
Her2	T1B	Spleen	621K8(8q)	CD44+CD24+	2	1	2		TNBC	TNBC2_PR	ITGA8(10p)	CK+	1	1	1
Her2	T1B	Spleen	621K8(8q)	CD44+CD24+	15	2	7.5		TNBC	TNBC2_PR	ITGA8(10p)	CK+	4	2	2
Her2	T1B	Spleen	621K8(8q)	CD44+CD24+	1	1	1		TNBC	TNBC2_PR	ITGA8(10p)	CK+	1	1	1
Her2	T1B	Spleen	621K8(8q)	CD44-CD24+	2	1	2		TNBC	TNBC2_PR	ITGA8(10p)	CK+	2	2	1
Her2	T1B	Spleen	621K8(8q)	CD44-CD24+	1	1	1		TNBC	TNBC2_PR	ITGA8(10p)	CK+	2	2	1
Her2	T1B	Spleen	621K8(8q)	CD44-CD24+	1	1	1		TNBC	TNBC2_PR	ITGA8(10p)	CK+	3	3	1
Her2	T1B	Spleen	621K8(8q)	CD44-CD24+	2	2	1		TNBC	TNBC2_PR	ITGA8(10p)	CK+	1	1	1
Her2	T1B	Spleen	621K8(8q)	CD44-CD24+	4	2	2		TNBC	TNBC2_PR	ITGA8(10p)	CK+	2	2	1
Her2	T1B	Spleen	621K8(8q)	CD44-CD24+	1	1	1		TNBC	TNBC2_PR	ITGA8(10p)	CK+	2	2	1
Her2	T1B	Spleen	621K8(8q)	CD44-CD24+	2	2	1		TNBC	TNBC2_PR	ITGA8(10p)	CK+	1	1	1
Her2	T1B	Spleen	621K8(8q)	CD44-CD24+	5	3	1.66667		TNBC	TNBC2_PR	ITGA8(10p)	CK+	1	2	0.5
Her2	T1B	Spleen	621K8(8q)	CD44-CD24+	1	2	0.5		TNBC	TNBC2_PR	ITGA8(10p)	CK+	3	2	1.5
Her2	T1B	Spleen	621K8(8q)	CD44-CD24+	7	2	3.5		TNBC	TNBC2_PR	ITGA8(10p)	CK+	2	2	1
Her2	T1B	Spleen	621K8(8q)	CD44-CD24+	4	1	4		TNBC	TNBC2_PR	ITGA8(10p)	CK+	3	2	1.5
Her2	T1B	Spleen	621K8(8q)	CD44-CD24+	6	2	3		TNBC	TNBC2_PR	ITGA8(10p)	CK+	2	1	2
Her2	T1B	Spleen	621K8(8q)	CD44-CD24+	11	6	1.83333		TNBC	TNBC2_PR	ITGA8(10p)	CK+	3	2	1.5
Her2	T1B	Spleen	621K8(8q)	CD44-CD24+	6	4	1.5		TNBC	TNBC2_PR	ITGA8(10p)	CK+	2	1	2
Her2	T1B	Spleen	621K8(8q)	CD44-CD24+	6	1	6		TNBC	TNBC2_PR	ITGA8(10p)	CK+	2	2	1
Her2	T1B	Spleen	621K8(8q)	CD44-CD24+	2	2	1		TNBC	TNBC2_PR	ITGA8(10p)	CK+	1	1	1
Her2	T1B	Spleen	621K8(8q)	CD44-CD24+	3	3	1		TNBC	TNBC2_PR	ITGA8(10p)	CK+	1	1	1
Her2	T1B	Spleen	621K8(8q)	CD44-CD24+	6	2	3		TNBC	TNBC2_PR	ITGA8(10p)	CK+	2	1	2
Her2	T1B	Spleen	621K8(8q)	CD44-CD24+	1	2	0.5		TNBC	TNBC2_PR	ITGA8(10p)	CK+	3	2	1.5
Her2	T1B	Spleen	621K8(8q)	CD44-CD24+	3	2	1.5		TNBC	TNBC2_PR	ITGA8(10p)	CK+	0	1	0
Her2	T1B	Spleen	621K8(8q)	CD44-CD24+	3	5	0.6		TNBC	TNBC2_PR	ITGA8(10p)	CK+	1	1	1
Her2	T1B	Spleen	621K8(8q)	CD44-CD24+	4	1	4		TNBC	TNBC2_PR	ITGA8(10p)	CK+	2	2	1
Her2	T1B	Spleen	621K8(8q)	CD44-CD24+	6	4	1.5		TNBC	TNBC2_PR	ITGA8(10p)	CK+	1	1	1
Her2	T1B	Spleen	621K8(8q)	CD44-CD24+	1	1	1		TNBC	TNBC2_PR	ITGA8(10p)	CK+	1	1	1
Her2	T1B	Spleen	621K8(8q)	CD44-CD24+	4	3	1.33333		TNBC	TNBC2_PR	ITGA8(10p)	CK+	2	2	1
Her2	T1B	Spleen	621K8(8q)	CD44-CD24+	2	1	2		TNBC	TNBC2_PR	ITGA8(10p)	CK+	2	2	1
Her2	T1B	Spleen	621K8(8q)	CD44-CD24+	7	3	2.33333		TNBC	TNBC2_PR	ITGA8(10p)	CK+	2	2	1
Her2	T1B	Spleen	621K8(8q)	CD44-CD24+	10	3	3.33333		TNBC	TNBC2_PR	ITGA8(10p)	CK+	1	1	1
Her2	T1B	Spleen	621K8(8q)	CD44-CD24+	5	3	1.66667		TNBC	TNBC2_PR	ITGA8(10p)	CK+	1	1	1
Her2	T1B	Spleen	621K8(8q)	CD44-CD24+	8	4	2		TNBC	TNBC2_PR	ITGA8(10p)	CK+	1	1	1
Her2	T1B	Spleen	621K8(8q)	CD44-CD24+	5	1	5		TNBC	TNBC2_PR	ITGA8(10p)	CK+	2	2	1
Her2	T1B	Spleen	621K8(8q)	CD44-CD24+	6	3	2		TNBC	TNBC2_PR	ITGA8(10p)	CK+	2	2	1
Her2	T1B	Spleen	621K8(8q)	CD44-CD24+	5	2	2.5		TNBC	TNBC2_PR	ITGA8(10p)	CK+	2	2	1
Her2	T1B	Spleen	621K8(8q)	CD44-CD24+	5	1	5		TNBC	TNBC2_PR	ITGA8(10p)	CK+	1	2	0.5
Her2	T1B	Spleen	621K8(8q)	CD44-CD24+	5	2	2.5		TNBC	TNBC2_PR	ITGA8(10p)	CK+	2	2	1
Her2	T1B	Spleen	621K8(8q)	CD44-CD24+	2	1	2		TNBC	TNBC2_PR	ITGA8(10p)	CK+	3	2	1.5
Her2	T1B	Spleen	621K8(8q)	CD44-CD24+	7	3	2.33333		TNBC	TNBC2_PR	ITGA8(10p)	CK+	2	2	1
Her2	T1B	Spleen	621K8(8q)	CD44-CD24+	3	2	1.5		TNBC	TNBC2_PR	ITGA8(10p)	CK+	3	3	1
Her2	T1B	Spleen	621K8(8q)	CD44-CD24+	5	2	2.5		TNBC	TNBC2_PR	ITGA8(10p)	CK+	0	1	0
Her2	T1B	Spleen	621K8(8q)	CD44-CD24+	2	1	2		TNBC	TNBC2_PR	ITGA8(10p)	CK+	1	1	1
Her2	T1B	Spleen	621K8(8q)	CD44-CD24+	5	2	2.5		TNBC	TNBC2_PR	ITGA8(10p)	CK+	3	1	3
Her2	T1B	Spleen	621K8(8q)	CD44-CD24+	2	2	1		TNBC	TNBC2_PR	ITGA8(10p)	CK+	2	2	1
Her2	T1B	Spleen	621K8(8q)	CD44-CD24+	7	2	3.5		TNBC	TNBC2_PR	ITGA8(10p)	CK+	3	3	1
Her2	T1B	Spleen	621K8(8q)	CD44-CD24+	4	4	1		TNBC	TNBC2_PR	ITGA8(10p)	CK+	1	1	1
Her2	T1B	Spleen	621K8(8q)	CD44-CD24+	2	2	1		TNBC	TNBC2_PR	ITGA8(10p)	CK+	1	1	1
Her2	T1B	Spleen	621K8(8q)	CD44-CD24+	3	3	1		TNBC	TNBC2_PR	ITGA8(10p)	CK+	1	1	1
Her2	T1B	Spleen	621K8(8q)	CD44-CD24+	3	1	3		TNBC	TNBC2_PR	ITGA8(10p)	CK+	1	1	1
Her2	T1B	Spleen	621K8(8q)	CD44-CD24+	3	2	1.5		TNBC	TNBC2_PR	ITGA8(10p)	CK+	1	1	1
Her2	T1B	Spleen	621K8(8q)	CD44-CD24+	7	3	2.33333		TNBC	TNBC2_PR	ITGA8(10p)	CK+	2	2	1
Her2	T1B	Spleen	621K8(8q)	CD44-CD24+	4	2	2		TNBC	TNBC2_PR	ITGA8(10p)	CK+	2	2	1
Her2	T1B	Spleen	621K8(8q)	CD44-CD24+	5	4	1.25		TNBC	TNBC2_PR	ITGA8(10p)	CK+	3	2	1.5
Her2	T1B	Spleen	621K8(8q)	CD44-CD24+	12	2	6		TNBC	TNBC2_PR	ITGA8(10p)	CK+	1	1	1
Her2	T1B	Spleen	621K8(8q)	CD44-CD24+	2	2	1		TNBC	TNBC2_PR	ITGA8(10p)	CK+	2	2	1
Her2	T1B	Spleen	621K8(8q)	CD44-CD24+	3	2	1.5		TNBC	TNBC2_PR	ITGA8(10p)	CK+	2	2	1
Her2	T1B	Spleen	621K8(8q)	CD44-CD24+	2	2	1		TNBC	TNBC2_PR	ITGA8(10p)	CK+	2	2	1
Her2	T1B	Spleen	621K8(8q)	CD44-CD24+	6	2	3		TNBC	TNBC2_PR	ITGA8(10p)	CK+	2	1	2
Her2	T1B	Spleen	621K8(8q)	CD44-CD24+	12	4	3		TNBC	TNBC2_PR	ITGA8(10p)	CK+	2	1	2
Her2	T1B	Spleen	621K8(8q)	CD44-CD24+	2	1	2		TNBC	TNBC2_PR	ITGA8(10p)	CK+	2	1	2
Her2	T1B	Spleen	621K8(8q)	CD44-CD24+	4	2	2		TNBC	TNBC2_PR	ITGA8(10p)	CK+	1	1	1
Her2	T1B	Spleen	621K8(8q)	CD44-CD24+	6	3	2		TNBC	TNBC2_PR	ITGA8(10p)	CK+	1	1	1
Her2	T1B	Spleen	621K8(8q)	CD44-CD24+	10	3	3.33333		TNBC	TNBC2_PR	ITGA8(10p)	CK+	2	1	2
Her2	T1B	Spleen	621K8(8q)	CD44-CD24+	3	1	3		TNBC	TNBC2_PR	ITGA8(10p)	CK+	2	2	1
Her2	T1B	Spleen	621K8(8q)	CD44-CD24+	8	2	4		TNBC	TNBC2_PR	ITGA8(10p)	CK+	3	2	1.5
Her2	T1B	Spleen	621K8(8q)	CD44-CD24+	3	3	1		TNBC	TNBC2_PR	ITGA8(10p)	CK+	1	1	1
Her2	T1B	Spleen	621K8(8q)	CD44-CD24+	3	3	1		TNBC	TNBC2_PR	ITGA8(10p)	CK+	2	2	1
Her2	T1B	Spleen	621K8(8q)	CD44-CD24+	7	2	3.5		TNBC	TNBC2_PR	ITGA8(10p)	CK+	1	1	1
Her2	T1B	Spleen	621K8(8q)	CD44-CD24+	6	4	1.5		TNBC	TNBC2_PR	ITGA8(10p)	CK+	2	2	1
Her2	T1B	Spleen	621K8(8q)	CD44-CD24+	8	3	2.66667		TNBC	TNBC2_PR	ITGA8(10p)	CK+	2	1	2
Her2	T1B	Spleen	621K8(8q)	CD44-CD24+	5	3	1.66667		TNBC	TNBC2_PR	ITGA8(10p)	CK+	2	2	1
Her2	T1B	Spleen	621K8(8q)	CD44-CD24+	11	3	3.66667		TNBC	TNBC2_PR	ITGA8(10p)	CK+	3	3	1
Her2	T1B	Spleen	621K8(8q)	CD44-CD24+	5	2	2.5		TNBC	TNBC2_PR	ITGA8(10p)	CK+	2	1	2
Her2	T1B	Spleen	621K8(8q)	CD44-CD24+	6	4	1.5		TNBC	TNBC2_PR	ITGA8(10p)	CK+	2	2	1
Her2	T1B	Spleen	621K8(8q)	CD44-CD24+	6	2	3		TNBC	TNBC2_PR	ITGA8(10p)	CK+	2	2	1
Her2	T1B	Spleen	621K8(8q)	CD44-CD24+	1	2	0.5		TNBC	TNBC2_PR	ITGA8(10p)	CK+	2	2	1
Her2	T1B	Spleen	621K8(8q)	CD44-CD24+	4	2	2		TNBC	TNBC2_PR	ITGA8(10p)	CK+	1	1	1
Her2	T1B	Spleen	621K8(8q)	CD44-CD24+	6	2	3		TNBC	TNBC2_PR	ITGA8(10p)	CK+	1	1	1
Her2	T1B	Spleen	621K8(8q)	CD44-CD24+	7	3	2.33333		TNBC	TNBC2_PR	ITGA8(10p)	CK+	4	3	1.33333
Her2	T1B	Spleen	621K8(8q)	CD44-CD24+	3	1	3		TNBC	TNBC2_PR	ITGA8(10p)	CK+	5	3	1.66667
Her2	T1B	Spleen	621K8(8q)	CD44-CD24+	1	1	1		TNBC	TNBC2_PR	ITGA8(10p)	CK+	3	2	1.5
Her2	T1B	Spleen	621K8(8q)	CD44-CD24+	4	2	2		TNBC	TNBC2_PR	ITGA8(10p)	CK+	2	2	1
Her2	T1B	Spleen	621K8(8q)	CD44-CD24+	5	2	2.5		TNBC	TNBC2_PR	ITGA8(10p)	CK+	2	2	1
Her2	T1B	Spleen	621K8(8q)	CD44-CD24+	1	1	1		TNBC	TNBC2_PR	ITGA8(10p)	CK+	3	3	1
Her2	T1B	Spleen	621K8(8q)	CD44-CD24+	3	2	1.5		TNBC	TNBC2_PR	ITGA8(10p)	CK+	2	2	1
Her2	T1B	Spleen	621K8(8q)	CD44-CD24+	6	2	3		TNBC	TNBC2_PR	ITGA8(10p)	CK+	2	2	1
Her2	T1B	Spleen	621K8(8q)	CD44-CD24+	5	3	1.66667		TNBC	TNBC2_PR	ITGA8(10p)	CK+	1	2	0.5
Her2	T1B	Spleen	621K8(8q)	CD44-CD24+	5	3	1.66667		TNBC	TNBC2_PR	ITGA8(10p)	CK+	1	1	1
Her2	T1B	Spleen	621K8(8q)	CD44-CD24+	7	3	2.33333		TNBC	TNBC2_PR	ITGA8(10p)	CK+	1	1	1
Her2	T1B	Spleen	621K8(8q)	CD44-CD24+	9	5	1.8		TNBC	TNBC2_PR	ITGA8(10p)	CK+	1	1	1
Her2	T1B	Spleen	621K8(8q)	CD44-CD24+	4	4	1		TNBC	TNBC2_PR	ITGA8(10p)	CK+	1	2	0.5
Her2	T1B	Spleen	621K8(8q)	CD44-CD24+	4	1	4		TNBC	TNBC2_PR	ITGA8(10p)	CK+	1	2	0.5
Her2	T1B	Spleen	621K8(8q)	CD44-CD24+	3	1	3		TNBC	TNBC2_PR	621K(8q)	CK+	2	1	2
Her2	T1B	Spleen	621K8(8q)	CD44-CD24+	1	2	0.5		TNBC	TNBC2_PR	621K(8q)	CK+	1	1	1
Her2	T1B	Spleen	621K8(8q)	CD44-CD24+	9	7	1.28571		TNBC	TNBC2_PR	621K(8q)	CK+	1	1	1
Her2	T1B	Spleen	621K8(8q)	CD44-CD24+	11	5	2.2		TNBC	TNBC2_PR	621K(8q)	CK+	1	1	1
Her2	T1B	Spleen	621K8(8q)	CD44-CD24+	4	2	2		TNBC	TNBC2_PR	621K(8q)	CK+	1	1	1
Her2	T1B	Spleen	621K8(8q)	CD44-CD24+	6	2	3		TNBC	TNBC2_PR	621K(8q)	CK+	1	1	1
Her2	T1B	Spleen	621K8(8q)	CD44-CD24+	2	2	1		TNBC	TNBC2_PR	621K(8q)	CK+	2	2	1
Her2	T1B	Spleen	621K8(8q)	CD44-CD24+	4	2	2		TNBC	TNBC2_PR	621K(8q)	CK+	1	1	1
Her2	T1B	Spleen	621K8(8q)	CD44-CD24+	1	1	1		TNBC	TNBC2_PR	621K(8q)	CK+	2	1	2
Her2	T1B	Spleen	621K8(8q)	CD44-CD24+	3	1	3		TNBC	TNBC2_PR	621K(8q)	CK+	1	1	1
Her2	T1B	Spleen	621K8(8q)	CD44-CD24-	1	1	1		TNBC	TNBC2_PR	621K(8q)	CK+	1	1	1
Her2	T1B	Spleen	621K8(8q)	CD44-CD24-	1	1	1		TNBC	TNBC2_PR	621K(8q)	CK+	2	2	1
Her2	T1B	Spleen	621K8(8q)	CD44-CD24-	11	4	2.75		TNBC	TNBC2_PR	621K(8q)	CK+	1	1	1
Her2	T1B	Spleen	621K8(8q)	CD44-CD24-	2	1	2		TNBC	TNBC2_PR	621K(8q)	CK+	1	1	1
Her2	T1B	Spleen	621K8(8q)	CD44-CD24-	2	1	2		TNBC	TNBC2_PR	621K(8q)	CK+	1	1	1
Her2	T1B	Spleen	621K8(8q)	CD44-CD24-	2	1	2		TNBC	TNBC2_PR	621K(8q)	CK+	2	1	2
Her2	T1B	Spleen	621K8(8q)	CD44-CD24-	1	1	1		TNBC	TNBC2_PR	621K(8q)	CK+	1	1	1
Her2	T1B	Spleen	621K8(8q)	CD44-CD24-	2	2	1		TNBC	TNBC2_PR	621K(8q)	CK+	1	1	1
Her2	T1B	Spleen	621K8(8q)	CD44-CD24-	1	2	0.5		TNBC	TNBC2_PR	621K(8q)	CK+	2	2	1
Her2	T1B	Spleen	621K8(8q)	CD44-CD24-	2	1	2		TNBC	TNBC2_PR	621K(8q)	CK+	1	1	1
Her2	T1B	Spleen	621K8(8q)	CD44-CD24-	6	4	1.5		TNBC	TNBC2_PR	621K(8q)	CK+	1	1	1
Her2	T1B	Spleen	621K8(8q)	CD44-CD24-	1	1	1		TNBC	TNBC2_PR	621K(8q)	CK+	1	2	0.5
Her2	T1B	Spleen	621K8(8q)	CD44-CD24-	1	1	1		TNBC	TNBC2_PR	621K(8q)	CK+	1	1	1
Her2	T1B	Spleen	621K8(8q)	CD44-CD24-	1	2	0.5		TNBC	TNBC2_PR	621K(8q)	CK+	3	2	1.5
Her2	T1B	Spleen	621K8(8q)	CD44-CD24-	1	1	1		TNBC	TNBC2_PR	621K(8q)	CK+	1	1	1
Her2	T1B	Spleen	621K8(8q)	CD44-CD24-	3	2	1.5		TNBC	TNBC2_PR	621K(8q)	CK+	1	1	1
Her2	T1B	Spleen	621K8(8q)	CD44-CD24-	2	1	2		TNBC	TNBC2_PR	621K(8q)	CK+	1	1	1
Her2	T1B	Spleen	621K8(8q)	CD44-CD24-	1	1	1		TNBC	TNBC2_PR	621K(8q)	CK+	2	2	1
Her2	T1B	Spleen	621K8(8q)	CD44-CD24-	4	3	1.33333		TNBC	TNBC2_PR	621K(8q)	CK+	2	2	1
Her2	T1B	Spleen	621K8(8q)	CD44-CD24-	7	4	1.75		TNBC	TNBC2_PR	621K(8q)	CK+	1	1	1
Her2	T1B	Spleen	621K8(8q)	CD44-CD24-	2	2	1		TNBC	TNBC2_PR	621K(8q)	CK+	1	1	1
Her2	T1B	Spleen	621K8(8q)	CD44-CD24-	1	1	1		TNBC	TNBC2_PR	621K(8q)	CK+	1	2	0.5
Her2	T1B	Spleen	621K8(8q)	CD44-CD24-	2	2	1		TNBC	TNBC2_PR	621K(8q)	CK+	1	1	1
Her2	T1B	Spleen	621K8(8q)	CD44-CD24-	7	2	3.5		TNBC	TNBC2_PR	621K(8q)	CK+	3	2	1.5
Her2	T1B	Spleen	621K8(8q)	CD44-CD24-	9	1	9		TNBC	TNBC2_PR	621K(8q)	CK+	1	1	1
Her2	T1B	Spleen	621K8(8q)	CD44-CD24-	2	2	1		TNBC	TNBC2_PR	621K(8q)	CK+	1	1	1
Her2	T1B	Spleen	621K8(8q)	CD44-CD24-	2	2	1		TNBC	TNBC2_PR	621K(8q)	CK+	1	1	1
Her2	T1B	Spleen	621K8(8q)	CD44-CD24-	4	3	1.33333		TNBC	TNBC2_PR	621K(8q)	CK+	2	2	1
Her2	T1B	Spleen	621K8(8q)	CD44-CD24-	2	2	1		TNBC	TNBC2_PR	621K(8q)	CK+	2	2	1
Her2	T1B	Spleen	621K8(8q)	CD44-CD24-	1	1	1		TNBC	TNBC2_PR	621K(8q)	CK+	1	1	1
Her2	T1B	Spleen	621K8(8q)	CD44-CD24-	4	2	2		TNBC	TNBC2_PR	621K(8q)	CK+	1	1	1
Her2	T1B	Spleen	621K8(8q)	CD44-CD24-	1	1	1		TNBC	TNBC2_PR	621K(8q)	CK+	3	2	1.5
Her2	T1B	Spleen	621K8(8q)	CD44-CD24-	4	3	1.33333		TNBC	TNBC2_PR	621K(8q)	CK+	2	2	1
Her2	T1B	Spleen	621K8(8q)	CD44-CD24-	4	3	1.33333		TNBC	TNBC2_PR	621K(8q)	CK+	1	1	1
Her2	T1B	Spleen	621K8(8q)	CD44-CD24-	3	1	3		TNBC	TNBC2_PR	621K(8q)	CK+	2	1	2
Her2	T1B	Spleen	621K8(8q)	CD44-CD24-	1	1	1		TNBC	TNBC2_PR	621K(8q)	CK+	1	1	1
Her2	T1B	Spleen	621K8(8q)	CD44-CD24-	6	2	3		TNBC	TNBC2_PR	621K(8q)	CK+	1	1	1
Her2	T1B	Spleen	621K8(8q)	CD44-CD24-	1	1	1		TNBC	TNBC2_PR	621K(8q)	CK+	2	2	1
Her2	T1B	Spleen	621K8(8q)	CD44-CD24-	2	2	1		TNBC	TNBC2_PR	621K(8q)	CK+	1	1	1
Her2	T1B	Spleen	621K8(8q)	CD44-CD24-	4	3	1.33333		TNBC	TNBC2_PR	621K(8q)	CK+	1	1	1
Her2	T1B	Spleen	621K8(8q)	CD44-CD24-	1	1	1		TNBC	TNBC2_PR	621K(8q)	CK+	2	2	1
Her2	T1B	Spleen	621K8(8q)	CD44-CD24-	2	2	1		TNBC	TNBC2_PR	621K(8q)	CK+	2	2	1
Her2	T1B	Spleen	621K8(8q)	CD44-CD24-	1	2	0.5		TNBC	TNBC2_PR	621K(8q)	CK+	2	1	2
Her2	T1B	Spleen	621K8(8q)	CD44-CD24-	3	2	1.5		TNBC	TNBC2_PR	621K(8q)	CK+	2	2	1
Her2	T1B	Spleen	621K8(8q)	CD44-CD24-	3	3	1		TNBC	TNBC2_PR	621K(8q)	CK+	2	2	1
Her2	T1B	Spleen	621K8(8q)	CD44-CD24-	2	2	1		TNBC	TNBC2_PR	621K(8q)	CK+	3	3	1
Her2	T1B	Spleen	621K8(8q)	CD44-CD24-	4	2	2		TNBC	TNBC2_PR	621K(8q)	CK+	1	1	1
Her2	T1B	Spleen	621K8(8q)	CD44-CD24-	5	2	2.5		TNBC	TNBC2_PR	621K(8q)	CK+	2	2	1
Her2	T1B	Spleen	621K8(8q)	CD44-CD24-	4	2	2		TNBC	TNBC2_PR	621K(8q)	CK+	2	2	1
Her2	T1B	Spleen	621K8(8q)	CD44-CD24-	1	2	0.5		TNBC	TNBC2_PR	621K(8q)	CK+	2	2	1
Her2	T1B	Spleen	621K8(8q)	CD44-CD24-	2	2	1		TNBC	TNBC2_PR	621K(8q)	CK+	1	1	1
Her2	T1B	Spleen	621K8(8q)	CD44-CD24-	1	1	1		TNBC	TNBC2_PR	621K(8q)	CK+	2	2	1
Her2	T1B	Spleen	621K8(8q)	CD44-CD24-	1	1	1		TNBC	TNBC2_PR	621K(8q)	CK+	2	2	1
Her2	T1B	Spleen	621K8(8q)	CD44-CD24-	2	2	1		TNBC	TNBC2_PR	621K(8q)	CK+	2	2	1
Her2	T1B	Spleen	621K8(8q)	CD44-CD24-	5	2	2.5		TNBC	TNBC2_PR	621K(8q)	CK+	1	1	1
Her2	T1B	Spleen	621K8(8q)	CD44-CD24-	4	3	1.33333		TNBC	TNBC2_PR	621K(8q)	CK+	2	2	1
Her2	T1B	Spleen	621K8(8q)	CD44-CD24-	5	1	5		TNBC	TNBC2_PR	621K(8q)	CK+	1	3	0.333333
Her2	T1B	Spleen	621K8(8q)	CD44-CD24-	3	1	3		TNBC	TNBC2_PR	621K(8q)	CK+	1	1	1
Her2	T1B	Spleen	621K8(8q)	CD44-CD24-	7	3	2.33333		TNBC	TNBC2_PR	621K(8q)	CK+	2	2	1
Her2	T1B	Spleen	621K8(8q)	CD44-CD24-	12	4	3		TNBC	TNBC2_PR	621K(8q)	CK+	1	1	1
Her2	T1B	Spleen	621K8(8q)	CD44-CD24-	2	2	1		TNBC	TNBC2_PR	621K(8q)	CK+	2	1	2
Her2	T1B	Spleen	621K8(8q)	CD44-CD24-	3	2	1.5		TNBC	TNBC2_PR	621K(8q)	CK+	1	1	1
Her2	T1B	Spleen	621K8(8q)	CD44-CD24-	3	2	1.5		TNBC	TNBC2_PR	621K(8q)	CK+	1	1	1
Her2	T1B	Spleen	621K8(8q)	CD44-CD24-	6	4	1.5		TNBC	TNBC2_PR	621K(8q)	CK+	3	2	1.5
Her2	T1B	Spleen	621K8(8q)	CD44-CD24-	1	1	1		TNBC	TNBC2_PR	621K(8q)	CK+	2	2	1
Her2	T1B	Spleen	621K8(8q)	CD44-CD24-	2	1	2		TNBC	TNBC2_PR	621K(8q)	CK+	2	2	1
Her2	T1B	Spleen	621K8(8q)	CD44-CD24-	2	1	2		TNBC	TNBC2_PR	621K(8q)	CK+	2	2	1
Her2	T1B	Spleen	621K8(8q)	CD44-CD24-	9	4	2.25		TNBC	TNBC2_PR	621K(8q)	CK+	3	2	1.5
Her2	T1B	Spleen	621K8(8q)	CD44-CD24-	3	2	1.5		TNBC	TNBC2_PR	621K(8q)	CK+	3	2	1.5
Her2	T1B	Spleen	621K8(8q)	CD44-CD24-	2	1	2		TNBC	TNBC2_PR	621K(8q)	CK+	2	2	1
Basal	T2A	Liver	H2AFJ(12p)	CD44+CD24-	5	4	1.25		TNBC	TNBC2_PR	621K(8q)	CK+	1	1	1
Basal	T2A	Liver	H2AFJ(12p)	CD44+CD24-	1	1	1		TNBC	TNBC2_PR	621K(8q)	CK+	1	1	1
Basal	T2A	Liver	H2AFJ(12p)	CD44+CD24-	3	3	1		TNBC	TNBC2_PR	621K(8q)	CK+	1	1	1
Basal	T2A	Liver	H2AFJ(12p)	CD44+CD24-	4	4	1		TNBC	TNBC2_PR	621K(8q)	CK+	1	1	1
Basal	T2A	Liver	H2AFJ(12p)	CD44+CD24-	1	2	0.5		TNBC	TNBC2_PR	621K(8q)	CK+	2	2	1
Basal	T2A	Liver	H2AFJ(12p)	CD44+CD24-	3	3	1		TNBC	TNBC2_PR	621K(8q)	CK+	1	1	1
Basal	T2A	Liver	H2AFJ(12p)	CD44+CD24-	1	2	0.5		TNBC	TNBC2_PR	621K(8q)	CK+	0	4	0
Basal	T2A	Liver	H2AFJ(12p)	CD44+CD24-	2	1	2		TNBC	TNBC2_PR	621K(8q)	CK+	1	1	1
Basal	T2A	Liver	H2AFJ(12p)	CD44+CD24-	2	2	1		TNBC	TNBC2_PR	621K(8q)	CK+	1	1	1
Basal	T2A	Liver	H2AFJ(12p)	CD44+CD24-	2	1	2		TNBC	TNBC2_PR	621K(8q)	CK+	1	1	1
Basal	T2A	Liver	H2AFJ(12p)	CD44+CD24-	3	2	1.5		TNBC	TNBC2_PR	621K(8q)	CK+	1	1	1
Basal	T2A	Liver	H2AFJ(12p)	CD44+CD24-	2	2	1		TNBC	TNBC2_PR	621K(8q)	CK+	2	2	1
Basal	T2A	Liver	H2AFJ(12p)	CD44+CD24-	8	6	1.33333		TNBC	TNBC2_PR	621K(8q)	CK+	1	1	1
Basal	T2A	Liver	H2AFJ(12p)	CD44+CD24-	4	3	1.33333		TNBC	TNBC2_PR	621K(8q)	CK+	1	1	1
Basal	T2A	Liver	H2AFJ(12p)	CD44+CD24-	3	2	1.5		TNBC	TNBC2_PR	621K(8q)	CK+	1	1	1
Basal	T2A	Liver	H2AFJ(12p)	CD44+CD24-	2	2	1		TNBC	TNBC2_PR	621K(8q)	CK+	1	1	1
Basal	T2A	Liver	H2AFJ(12p)	CD44+CD24-	5	4	1.25		TNBC	TNBC2_PR	621K(8q)	CK+	2	2	1
Basal	T2A	Liver	H2AFJ(12p)	CD44+CD24-	1	1	1		TNBC	TNBC2_PR	621K(8q)	CK+	1	1	1
Basal	T2A	Liver	H2AFJ(12p)	CD44+CD24-	4	4	1		TNBC	TNBC2_PR	621K(8q)	CK+	1	1	1
Basal	T2A	Liver	H2AFJ(12p)	CD44+CD24-	3	2	1.5		TNBC	TNBC2_PR	621K(8q)	CK+	2	2	1
Basal	T2A	Liver	H2AFJ(12p)	CD44+CD24-	2	1	2		TNBC	TNBC2_LN	H2AFJ(12p)	CK+	1	2	0.5
Basal	T2A	Liver	H2AFJ(12p)	CD44+CD24-	7	2	3.5		TNBC	TNBC2_LN	H2AFJ(12p)	CK+	2	2	1
Basal	T2A	Liver	H2AFJ(12p)	CD44+CD24-	7	3	2.33333		TNBC	TNBC2_LN	H2AFJ(12p)	CK+	1	1	1
Basal	T2A	Liver	H2AFJ(12p)	CD44+CD24-	8	4	2		TNBC	TNBC2_LN	H2AFJ(12p)	CK+	1	2	0.5
Basal	T2A	Liver	H2AFJ(12p)	CD44+CD24-	5	3	1.66667		TNBC	TNBC2_LN	H2AFJ(12p)	CK+	0	2	0
Basal	T2A	Liver	H2AFJ(12p)	CD44+CD24-	10	2	5		TNBC	TNBC2_LN	H2AFJ(12p)	CK+	1	2	0.5
Basal	T2A	Liver	H2AFJ(12p)	CD44+CD24-	3	1	3		TNBC	TNBC2_LN	H2AFJ(12p)	CK+	1	2	0.5
Basal	T2A	Liver	H2AFJ(12p)	CD44+CD24-	6	1	6		TNBC	TNBC2_LN	H2AFJ(12p)	CK+	2	2	1
Basal	T2A	Liver	H2AFJ(12p)	CD44+CD24-	9	4	2.25		TNBC	TNBC2_LN	H2AFJ(12p)	CK+	1	1	1
Basal	T2A	Liver	H2AFJ(12p)	CD44+CD24-	6	1	6		TNBC	TNBC2_LN	H2AFJ(12p)	CK+	2	2	1
Basal	T2A	Liver	H2AFJ(12p)	CD44+CD24-	9	4	2.25		TNBC	TNBC2_LN	H2AFJ(12p)	CK+	2	2	1
Basal	T2A	Liver	H2AFJ(12p)	CD44+CD24-	5	1	5		TNBC	TNBC2_LN	H2AFJ(12p)	CK+	1	1	1
Basal	T2A	Liver	H2AFJ(12p)	CD44+CD24-	6	4	1.5		TNBC	TNBC2_LN	H2AFJ(12p)	CK+	4	5	0.8
Basal	T2A	Liver	H2AFJ(12p)	CD44+CD24-	5	1	5		TNBC	TNBC2_LN	H2AFJ(12p)	CK+	2	3	0.666667
Basal	T2A	Liver	H2AFJ(12p)	CD44+CD24-	7	4	1.75		TNBC	TNBC2_LN	H2AFJ(12p)	CK+	2	2	1
Basal	T2A	Liver	H2AFJ(12p)	CD44+CD24-	7	4	1.75		TNBC	TNBC2_LN	H2AFJ(12p)	CK+	1	2	0.5
Basal	T2A	Liver	H2AFJ(12p)	CD44+CD24-	6	1	6		TNBC	TNBC2_LN	H2AFJ(12p)	CK+	1	1	1
Basal	T2A	Liver	H2AFJ(12p)	CD44+CD24-	5	3	1.66667		TNBC	TNBC2_LN	H2AFJ(12p)	CK+	3	1	3
Basal	T2A	Liver	H2AFJ(12p)	CD44+CD24-	2	1	2		TNBC	TNBC2_LN	H2AFJ(12p)	CK+	2	1	2
Basal	T2A	Liver	H2AFJ(12p)	CD44+CD24-	2	2	1		TNBC	TNBC2_LN	H2AFJ(12p)	CK+	2	2	1
Basal	T2A	Liver	H2AFJ(12p)	CD44+CD24-	8	4	2		TNBC	TNBC2_LN	H2AFJ(12p)	CK+	2	1	2
Basal	T2A	Liver	H2AFJ(12p)	CD44+CD24-	7	2	3.5		TNBC	TNBC2_LN	H2AFJ(12p)	CK+	2	3	0.666667
Basal	T2A	Liver	H2AFJ(12p)	CD44+CD24-	7	4	1.75		TNBC	TNBC2_LN	H2AFJ(12p)	CK+	2	2	1
Basal	T2A	Liver	H2AFJ(12p)	CD44+CD24-	7	4	1.75		TNBC	TNBC2_LN	H2AFJ(12p)	CK+	1	2	0.5
Basal	T2A	Liver	H2AFJ(12p)	CD44+CD24-	8	3	2.66667		TNBC	TNBC2_LN	H2AFJ(12p)	CK+	2	2	1
Basal	T2A	Liver	H2AFJ(12p)	CD44+CD24-	1	1	1		TNBC	TNBC2_LN	H2AFJ(12p)	CK+	1	1	1
Basal	T2A	Liver	H2AFJ(12p)	CD44+CD24-	11	6	1.83333		TNBC	TNBC2_LN	H2AFJ(12p)	CK+	1	1	1
Basal	T2A	Liver	H2AFJ(12p)	CD44+CD24-	8	2	4		TNBC	TNBC2_LN	H2AFJ(12p)	CK+	6	6	1
Basal	T2A	Liver	H2AFJ(12p)	CD44+CD24-	8	3	2.66667		TNBC	TNBC2_LN	H2AFJ(12p)	CK+	1	1	1
Basal	T2A	Liver	H2AFJ(12p)	CD44+CD24-	8	4	2		TNBC	TNBC2_LN	H2AFJ(12p)	CK+	2	2	1
Basal	T2A	Liver	H2AFJ(12p)	CD44+CD24-	13	7	1.85714		TNBC	TNBC2_LN	H2AFJ(12p)	CK+	3	3	1
Basal	T2A	Liver	H2AFJ(12p)	CD44+CD24-	3	1	3		TNBC	TNBC2_LN	H2AFJ(12p)	CK+	0	4	0
Basal	T2A	Liver	H2AFJ(12p)	CD44+CD24-	14	4	3.5		TNBC	TNBC2_LN	H2AFJ(12p)	CK+	3	4	0.75
Basal	T2A	Liver	H2AFJ(12p)	CD44+CD24-	6	4	1.5		TNBC	TNBC2_LN	H2AFJ(12p)	CK+	1	1	1
Basal	T2A	Liver	H2AFJ(12p)	CD44+CD24-	5	3	1.66667		TNBC	TNBC2_LN	H2AFJ(12p)	CK+	1	1	1
Basal	T2A	Liver	H2AFJ(12p)	CD44+CD24-	10	3	3.33333		TNBC	TNBC2_LN	H2AFJ(12p)	CK+	1	5	0.2
Basal	T2A	Liver	H2AFJ(12p)	CD44+CD24-	3	2	1.5		TNBC	TNBC2_LN	H2AFJ(12p)	CK+	5	7	0.714286
Basal	T2A	Liver	H2AFJ(12p)	CD44+CD24-	15	5	3		TNBC	TNBC2_LN	H2AFJ(12p)	CK+	3	3	1
Basal	T2A	Liver	H2AFJ(12p)	CD44+CD24-	14	5	2.8		TNBC	TNBC2_LN	H2AFJ(12p)	CK+	3	3	1
Basal	T2A	Liver	H2AFJ(12p)	CD44+CD24-	17	4	4.25		TNBC	TNBC2_LN	H2AFJ(12p)	CK+	5	5	1
Basal	T2A	Liver	H2AFJ(12p)	CD44+CD24-	7	2	3.5		TNBC	TNBC2_LN	H2AFJ(12p)	CK+	2	2	1
Basal	T2A	Liver	H2AFJ(12p)	CD44+CD24-	10	5	2		TNBC	TNBC2_LN	H2AFJ(12p)	CK+	2	2	1
Basal	T2A	Liver	H2AFJ(12p)	CD44+CD24-	9	3	3		TNBC	TNBC2_LN	H2AFJ(12p)	CK+	1	1	1
Basal	T2A	Liver	H2AFJ(12p)	CD44+CD24-	6	3	2		TNBC	TNBC2_LN	H2AFJ(12p)	CK+	3	3	1
Basal	T2A	Liver	H2AFJ(12p)	CD44+CD24-	7	2	3.5		TNBC	TNBC2_LN	H2AFJ(12p)	CK+	2	2	1
Basal	T2A	Liver	H2AFJ(12p)	CD44+CD24-	13	6	2.16667		TNBC	TNBC2_LN	H2AFJ(12p)	CK+	2	2	1
Basal	T2A	Liver	H2AFJ(12p)	CD44+CD24-	10	4	2.5		TNBC	TNBC2_LN	H2AFJ(12p)	CK+	2	2	1
Basal	T2A	Liver	H2AFJ(12p)	CD44+CD24-	4	1	4		TNBC	TNBC2_LN	H2AFJ(12p)	CK+	1	1	1
Basal	T2A	Liver	H2AFJ(12p)	CD44+CD24-	6	3	2		TNBC	TNBC2_LN	H2AFJ(12p)	CK+	4	2	2
Basal	T2A	Liver	H2AFJ(12p)	CD44+CD24-	9	3	3		TNBC	TNBC2_LN	H2AFJ(12p)	CK+	3	2	1.5
Basal	T2A	Liver	H2AFJ(12p)	CD44+CD24-	6	1	6		TNBC	TNBC2_LN	H2AFJ(12p)	CK+	1	1	1
Basal	T2A	Liver	H2AFJ(12p)	CD44+CD24-	8	6	1.33333		TNBC	TNBC2_LN	H2AFJ(12p)	CK+	2	3	0.666667
Basal	T2A	Liver	H2AFJ(12p)	CD44+CD24-	3	1	3		TNBC	TNBC2_LN	H2AFJ(12p)	CK+	2	2	1
Basal	T2A	Liver	H2AFJ(12p)	CD44+CD24-	17	4	4.25		TNBC	TNBC2_LN	H2AFJ(12p)	CK+	2	2	1
Basal	T2A	Liver	H2AFJ(12p)	CD44+CD24-	6	2	3		TNBC	TNBC2_LN	H2AFJ(12p)	CK+	2	2	1
Basal	T2A	Liver	H2AFJ(12p)	CD44+CD24-	3	2	1.5		TNBC	TNBC2_LN	H2AFJ(12p)	CK+	1	1	1
Basal	T2A	Liver	H2AFJ(12p)	CD44+CD24-	2	3	0.666667		TNBC	TNBC2_LN	H2AFJ(12p)	CK+	4	4	1
Basal	T2A	Liver	H2AFJ(12p)	CD44+CD24-	4	2	2		TNBC	TNBC2_LN	H2AFJ(12p)	CK+	3	3	1
Basal	T2A	Liver	H2AFJ(12p)	CD44+CD24-	6	3	2		TNBC	TNBC2_LN	H2AFJ(12p)	CK+	2	2	1
Basal	T2A	Liver	H2AFJ(12p)	CD44+CD24-	2	2	1		TNBC	TNBC2_LN	H2AFJ(12p)	CK+	1	1	1
Basal	T2A	Liver	H2AFJ(12p)	CD44+CD24-	2	2	1		TNBC	TNBC2_LN	H2AFJ(12p)	CK+	2	2	1
Basal	T2A	Liver	H2AFJ(12p)	CD44+CD24-	7	1	7		TNBC	TNBC2_LN	H2AFJ(12p)	CK+	2	2	1
Basal	T2A	Liver	H2AFJ(12p)	CD44+CD24-	15	6	2.5		TNBC	TNBC2_LN	H2AFJ(12p)	CK+	2	2	1
Basal	T2A	Liver	H2AFJ(12p)	CD44+CD24-	4	1	4		TNBC	TNBC2_LN	H2AFJ(12p)	CK+	1	1	1
Basal	T2A	Liver	H2AFJ(12p)	CD44+CD24-	5	4	1.25		TNBC	TNBC2_LN	H2AFJ(12p)	CK+	1	1	1
Basal	T2A	Liver	H2AFJ(12p)	CD44+CD24-	4	2	2		TNBC	TNBC2_LN	H2AFJ(12p)	CK+	1	1	1
Basal	T2A	Liver	H2AFJ(12p)	CD44+CD24-	4	1	4		TNBC	TNBC2_LN	H2AFJ(12p)	CK+	1	1	1
Basal	T2A	Liver	H2AFJ(12p)	CD44+CD24-	4	3	1.33333		TNBC	TNBC2_LN	H2AFJ(12p)	CK+	2	2	1
Basal	T2A	Liver	H2AFJ(12p)	CD44+CD24-	10	3	3.33333		TNBC	TNBC2_LN	H2AFJ(12p)	CK+	2	2	1
Basal	T2A	Liver	H2AFJ(12p)	CD44+CD24-	11	5	2.2		TNBC	TNBC2_LN	H2AFJ(12p)	CK+	2	2	1
Basal	T2A	Liver	H2AFJ(12p)	CD44+CD24-	12	2	6		TNBC	TNBC2_LN	H2AFJ(12p)	CK+	0	1	0
Basal	T2A	Liver	H2AFJ(12p)	CD44+CD24-	8	4	2		TNBC	TNBC2_LN	H2AFJ(12p)	CK+	1	2	0.5
Basal	T2A	Liver	H2AFJ(12p)	CD44+CD24-	1	1	1		TNBC	TNBC2_LN	H2AFJ(12p)	CK+	3	3	1
Basal	T2A	Liver	H2AFJ(12p)	CD44+CD24-	9	3	3		TNBC	TNBC2_LN	H2AFJ(12p)	CK+	2	2	1
Basal	T2A	Liver	H2AFJ(12p)	CD44+CD24-	9	2	4.5		TNBC	TNBC2_LN	H2AFJ(12p)	CK+	2	2	1
Basal	T2A	Liver	H2AFJ(12p)	CD44+CD24-	6	2	3		TNBC	TNBC2_LN	H2AFJ(12p)	CK+	2	2	1
Basal	T2A	Liver	H2AFJ(12p)	CD44+CD24-	5	1	5		TNBC	TNBC2_LN	H2AFJ(12p)	CK+	1	1	1
Basal	T2A	Liver	H2AFJ(12p)	CD44+CD24-	2	2	1		TNBC	TNBC2_LN	H2AFJ(12p)	CK+	2	3	0.666667
Basal	T2A	Liver	H2AFJ(12p)	CD44+CD24-	5	2	2.5		TNBC	TNBC2_LN	H2AFJ(12p)	CK+	2	2	1
Basal	T2A	Liver	H2AFJ(12p)	CD44+CD24-	9	3	3		TNBC	TNBC2_LN	H2AFJ(12p)	CK+	1	2	0.5
Basal	T2A	Liver	H2AFJ(12p)	CD44+CD24+	4	3	1.33333		TNBC	TNBC2_LN	H2AFJ(12p)	CK+	2	2	1
Basal	T2A	Liver	H2AFJ(12p)	CD44+CD24+	4	2	2		TNBC	TNBC2_LN	H2AFJ(12p)	CK+	2	2	1
Basal	T2A	Liver	H2AFJ(12p)	CD44+CD24+	4	4	1		TNBC	TNBC2_LN	H2AFJ(12p)	CK+	2	1	2
Basal	T2A	Liver	H2AFJ(12p)	CD44+CD24+	3	2	1.5		TNBC	TNBC2_LN	H2AFJ(12p)	CK+	1	3	0.333333
Basal	T2A	Liver	H2AFJ(12p)	CD44+CD24+	3	4	0.75		TNBC	TNBC2_LN	H2AFJ(12p)	CK+	2	2	1
Basal	T2A	Liver	H2AFJ(12p)	CD44+CD24+	2	3	0.666667		TNBC	TNBC2_LN	H2AFJ(12p)	CK+	3	2	1.5
Basal	T2A	Liver	H2AFJ(12p)	CD44+CD24+	2	3	0.666667		TNBC	TNBC2_LN	H2AFJ(12p)	CK+	3	4	0.75
Basal	T2A	Liver	H2AFJ(12p)	CD44+CD24+	4	3	1.33333		TNBC	TNBC2_LN	H2AFJ(12p)	CK+	3	3	1
Basal	T2A	Liver	H2AFJ(12p)	CD44+CD24+	2	1	2		TNBC	TNBC2_LN	H2AFJ(12p)	CK+	4	4	1
Basal	T2A	Liver	H2AFJ(12p)	CD44+CD24+	1	2	0.5		TNBC	TNBC2_LN	H2AFJ(12p)	CK+	3	3	1
Basal	T2A	Liver	H2AFJ(12p)	CD44+CD24+	3	1	3		TNBC	TNBC2_LN	H2AFJ(12p)	CK+	2	1	2
Basal	T2A	Liver	H2AFJ(12p)	CD44+CD24+	1	2	0.5		TNBC	TNBC2_LN	H2AFJ(12p)	CK+	2	2	1
Basal	T2A	Liver	H2AFJ(12p)	CD44+CD24+	4	2	2		TNBC	TNBC2_LN	H2AFJ(12p)	CK+	2	2	1
Basal	T2A	Liver	H2AFJ(12p)	CD44+CD24+	1	1	1		TNBC	TNBC2_LN	H2AFJ(12p)	CK+	2	3	0.666667
Basal	T2A	Liver	H2AFJ(12p)	CD44+CD24+	2	3	0.666667		TNBC	TNBC2_LN	H2AFJ(12p)	CK+	1	2	0.5
Basal	T2A	Liver	H2AFJ(12p)	CD44+CD24+	2	1	2		TNBC	TNBC2_LN	H2AFJ(12p)	CK+	2	2	1
Basal	T2A	Liver	H2AFJ(12p)	CD44+CD24+	1	1	1		TNBC	TNBC2_LN	H2AFJ(12p)	CK+	2	2	1
Basal	T2A	Liver	H2AFJ(12p)	CD44+CD24+	2	1	2		TNBC	TNBC2_LN	H2AFJ(12p)	CK+	2	2	1
Basal	T2A	Liver	H2AFJ(12p)	CD44+CD24+	2	3	0.666667		TNBC	TNBC2_LN	H2AFJ(12p)	CK+	2	1	2
Basal	T2A	Liver	H2AFJ(12p)	CD44+CD24+	2	1	2		TNBC	TNBC2_LN	H2AFJ(12p)	CK+	2	2	1
Basal	T2A	Liver	H2AFJ(12p)	CD44+CD24+	1	1	1		TNBC	TNBC2_LN	ITGA8(10p)	CK+	1	1	1
Basal	T2A	Liver	H2AFJ(12p)	CD44+CD24+	3	1	3		TNBC	TNBC2_LN	ITGA8(10p)	CK+	1	1	1
Basal	T2A	Liver	H2AFJ(12p)	CD44+CD24+	2	1	2		TNBC	TNBC2_LN	ITGA8(10p)	CK+	3	2	1.5
Basal	T2A	Liver	H2AFJ(12p)	CD44+CD24+	4	2	2		TNBC	TNBC2_LN	ITGA8(10p)	CK+	3	2	1.5
Basal	T2A	Liver	H2AFJ(12p)	CD44+CD24+	1	2	0.5		TNBC	TNBC2_LN	ITGA8(10p)	CK+	1	1	1
Basal	T2A	Liver	H2AFJ(12p)	CD44+CD24+	2	2	1		TNBC	TNBC2_LN	ITGA8(10p)	CK+	1	1	1
Basal	T2A	Liver	H2AFJ(12p)	CD44+CD24+	2	2	1		TNBC	TNBC2_LN	ITGA8(10p)	CK+	3	3	1
Basal	T2A	Liver	H2AFJ(12p)	CD44+CD24+	1	1	1		TNBC	TNBC2_LN	ITGA8(10p)	CK+	7	1	7
Basal	T2A	Liver	H2AFJ(12p)	CD44+CD24+	2	2	1		TNBC	TNBC2_LN	ITGA8(10p)	CK+	3	2	1.5
Basal	T2A	Liver	H2AFJ(12p)	CD44+CD24+	1	1	1		TNBC	TNBC2_LN	ITGA8(10p)	CK+	3	1	3
Basal	T2A	Liver	H2AFJ(12p)	CD44+CD24+	3	3	1		TNBC	TNBC2_LN	ITGA8(10p)	CK+	2	2	1
Basal	T2A	Liver	H2AFJ(12p)	CD44+CD24+	2	1	2		TNBC	TNBC2_LN	ITGA8(10p)	CK+	2	1	2
Basal	T2A	Liver	H2AFJ(12p)	CD44+CD24+	1	3	0.333333		TNBC	TNBC2_LN	ITGA8(10p)	CK+	0	1	0
Basal	T2A	Liver	H2AFJ(12p)	CD44+CD24+	2	2	1		TNBC	TNBC2_LN	ITGA8(10p)	CK+	3	2	1.5
Basal	T2A	Liver	H2AFJ(12p)	CD44+CD24+	1	1	1		TNBC	TNBC2_LN	ITGA8(10p)	CK+	3	2	1.5
Basal	T2A	Liver	H2AFJ(12p)	CD44+CD24+	2	1	2		TNBC	TNBC2_LN	ITGA8(10p)	CK+	0	1	0
Basal	T2A	Liver	H2AFJ(12p)	CD44+CD24+	2	2	1		TNBC	TNBC2_LN	ITGA8(10p)	CK+	4	1	4
Basal	T2A	Liver	H2AFJ(12p)	CD44+CD24+	6	3	2		TNBC	TNBC2_LN	ITGA8(10p)	CK+	2	1	2
Basal	T2A	Liver	H2AFJ(12p)	CD44+CD24+	6	3	2		TNBC	TNBC2_LN	ITGA8(10p)	CK+	4	1	4
Basal	T2A	Liver	H2AFJ(12p)	CD44+CD24+	7	3	2.33333		TNBC	TNBC2_LN	ITGA8(10p)	CK+	1	1	1
Basal	T2A	Liver	H2AFJ(12p)	CD44+CD24+	7	3	2.33333		TNBC	TNBC2_LN	ITGA8(10p)	CK+	2	2	1
Basal	T2A	Liver	H2AFJ(12p)	CD44+CD24+	7	3	2.33333		TNBC	TNBC2_LN	ITGA8(10p)	CK+	3	2	1.5
Basal	T2A	Liver	H2AFJ(12p)	CD44+CD24+	9	3	3		TNBC	TNBC2_LN	ITGA8(10p)	CK+	2	1	2
Basal	T2A	Liver	H2AFJ(12p)	CD44+CD24+	6	3	2		TNBC	TNBC2_LN	ITGA8(10p)	CK+	2	2	1
Basal	T2A	Liver	H2AFJ(12p)	CD44+CD24+	7	3	2.33333		TNBC	TNBC2_LN	ITGA8(10p)	CK+	2	2	1
Basal	T2A	Liver	H2AFJ(12p)	CD44+CD24+	7	3	2.33333		TNBC	TNBC2_LN	ITGA8(10p)	CK+	2	1	2
Basal	T2A	Liver	H2AFJ(12p)	CD44+CD24+	6	3	2		TNBC	TNBC2_LN	ITGA8(10p)	CK+	2	1	2
Basal	T2A	Liver	H2AFJ(12p)	CD44+CD24+	6	3	2		TNBC	TNBC2_LN	ITGA8(10p)	CK+	1	1	1
Basal	T2A	Liver	H2AFJ(12p)	CD44+CD24+	6	4	1.5		TNBC	TNBC2_LN	ITGA8(10p)	CK+	2	1	2
Basal	T2A	Liver	H2AFJ(12p)	CD44+CD24+	6	3	2		TNBC	TNBC2_LN	ITGA8(10p)	CK+	3	2	1.5
Basal	T2A	Liver	H2AFJ(12p)	CD44+CD24+	4	1	4		TNBC	TNBC2_LN	ITGA8(10p)	CK+	2	2	1
Basal	T2A	Liver	H2AFJ(12p)	CD44+CD24+	10	3	3.33333		TNBC	TNBC2_LN	ITGA8(10p)	CK+	3	3	1
Basal	T2A	Liver	H2AFJ(12p)	CD44+CD24+	7	4	1.75		TNBC	TNBC2_LN	ITGA8(10p)	CK+	2	2	1
Basal	T2A	Liver	H2AFJ(12p)	CD44+CD24+	7	3	2.33333		TNBC	TNBC2_LN	ITGA8(10p)	CK+	4	4	1
Basal	T2A	Liver	H2AFJ(12p)	CD44+CD24+	9	4	2.25		TNBC	TNBC2_LN	ITGA8(10p)	CK+	3	3	1
Basal	T2A	Liver	H2AFJ(12p)	CD44+CD24+	19	5	3.8		TNBC	TNBC2_LN	ITGA8(10p)	CK+	3	2	1.5
Basal	T2A	Liver	H2AFJ(12p)	CD44+CD24+	11	5	2.2		TNBC	TNBC2_LN	ITGA8(10p)	CK+	2	1	2
Basal	T2A	Liver	H2AFJ(12p)	CD44+CD24+	8	2	4		TNBC	TNBC2_LN	ITGA8(10p)	CK+	2	1	2
Basal	T2A	Liver	H2AFJ(12p)	CD44+CD24+	8	2	4		TNBC	TNBC2_LN	ITGA8(10p)	CK+	2	2	1
Basal	T2A	Liver	H2AFJ(12p)	CD44+CD24+	9	2	4.5		TNBC	TNBC2_LN	ITGA8(10p)	CK+	3	3	1
Basal	T2A	Liver	H2AFJ(12p)	CD44+CD24+	17	4	4.25		TNBC	TNBC2_LN	ITGA8(10p)	CK+	3	2	1.5
Basal	T2A	Liver	H2AFJ(12p)	CD44+CD24+	10	4	2.5		TNBC	TNBC2_LN	ITGA8(10p)	CK+	2	1	2
Basal	T2A	Liver	H2AFJ(12p)	CD44+CD24+	25	7	3.57143		TNBC	TNBC2_LN	ITGA8(10p)	CK+	4	2	2
Basal	T2A	Liver	H2AFJ(12p)	CD44+CD24+	14	4	3.5		TNBC	TNBC2_LN	ITGA8(10p)	CK+	4	2	2
Basal	T2A	Liver	H2AFJ(12p)	CD44+CD24+	7	3	2.33333		TNBC	TNBC2_LN	ITGA8(10p)	CK+	6	1	6
Basal	T2A	Liver	H2AFJ(12p)	CD44+CD24+	9	3	3		TNBC	TNBC2_LN	ITGA8(10p)	CK+	0	1	0
Basal	T2A	Liver	H2AFJ(12p)	CD44+CD24+	4	1	4		TNBC	TNBC2_LN	ITGA8(10p)	CK+	3	1	3
Basal	T2A	Liver	H2AFJ(12p)	CD44+CD24+	13	3	4.33333		TNBC	TNBC2_LN	ITGA8(10p)	CK+	2	1	2
Basal	T2A	Liver	H2AFJ(12p)	CD44+CD24+	6	4	1.5		TNBC	TNBC2_LN	ITGA8(10p)	CK+	2	1	2
Basal	T2A	Liver	H2AFJ(12p)	CD44+CD24+	15	5	3		TNBC	TNBC2_LN	ITGA8(10p)	CK+	2	2	1
Basal	T2A	Liver	H2AFJ(12p)	CD44+CD24+	15	6	2.5		TNBC	TNBC2_LN	ITGA8(10p)	CK+	3	1	3
Basal	T2A	Liver	H2AFJ(12p)	CD44+CD24+	8	3	2.66667		TNBC	TNBC2_LN	ITGA8(10p)	CK+	1	1	1
Basal	T2A	Liver	H2AFJ(12p)	CD44+CD24+	9	1	9		TNBC	TNBC2_LN	ITGA8(10p)	CK+	1	1	1
Basal	T2A	Liver	H2AFJ(12p)	CD44+CD24+	9	2	4.5		TNBC	TNBC2_LN	ITGA8(10p)	CK+	1	1	1
Basal	T2A	Liver	H2AFJ(12p)	CD44+CD24+	15	6	2.5		TNBC	TNBC2_LN	ITGA8(10p)	CK+	0	1	0
Basal	T2A	Liver	H2AFJ(12p)	CD44+CD24+	6	3	2		TNBC	TNBC2_LN	ITGA8(10p)	CK+	5	2	2.5
Basal	T2A	Liver	H2AFJ(12p)	CD44+CD24+	4	2	2		TNBC	TNBC2_LN	ITGA8(10p)	CK+	1	1	1
Basal	T2A	Liver	H2AFJ(12p)	CD44+CD24+	11	4	2.75		TNBC	TNBC2_LN	ITGA8(10p)	CK+	1	1	1
Basal	T2A	Liver	H2AFJ(12p)	CD44+CD24+	2	2	1		TNBC	TNBC2_LN	ITGA8(10p)	CK+	1	1	1
Basal	T2A	Liver	H2AFJ(12p)	CD44+CD24+	6	2	3		TNBC	TNBC2_LN	ITGA8(10p)	CK+	1	1	1
Basal	T2A	Liver	H2AFJ(12p)	CD44+CD24+	8	3	2.66667		TNBC	TNBC2_LN	ITGA8(10p)	CK+	2	1	2
Basal	T2A	Liver	H2AFJ(12p)	CD44+CD24+	6	2	3		TNBC	TNBC2_LN	ITGA8(10p)	CK+	2	1	2
Basal	T2A	Liver	H2AFJ(12p)	CD44+CD24+	12	5	2.4		TNBC	TNBC2_LN	ITGA8(10p)	CK+	4	2	2
Basal	T2A	Liver	H2AFJ(12p)	CD44+CD24+	6	4	1.5		TNBC	TNBC2_LN	ITGA8(10p)	CK+	2	1	2
Basal	T2A	Liver	H2AFJ(12p)	CD44+CD24+	4	2	2		TNBC	TNBC2_LN	ITGA8(10p)	CK+	3	3	1
Basal	T2A	Liver	H2AFJ(12p)	CD44+CD24+	11	3	3.66667		TNBC	TNBC2_LN	ITGA8(10p)	CK+	2	2	1
Basal	T2A	Liver	H2AFJ(12p)	CD44+CD24+	3	1	3		TNBC	TNBC2_LN	ITGA8(10p)	CK+	2	2	1
Basal	T2A	Liver	H2AFJ(12p)	CD44+CD24+	14	6	2.33333		TNBC	TNBC2_LN	ITGA8(10p)	CK+	4	3	1.33333
Basal	T2A	Liver	H2AFJ(12p)	CD44+CD24+	4	2	2		TNBC	TNBC2_LN	ITGA8(10p)	CK+	1	1	1
Basal	T2A	Liver	H2AFJ(12p)	CD44+CD24+	7	3	2.33333		TNBC	TNBC2_LN	ITGA8(10p)	CK+	1	2	0.5
Basal	T2A	Liver	H2AFJ(12p)	CD44+CD24+	9	3	3		TNBC	TNBC2_LN	ITGA8(10p)	CK+	3	2	1.5
Basal	T2A	Liver	H2AFJ(12p)	CD44+CD24+	3	2	1.5		TNBC	TNBC2_LN	ITGA8(10p)	CK+	1	1	1
Basal	T2A	Liver	H2AFJ(12p)	CD44+CD24+	5	2	2.5		TNBC	TNBC2_LN	ITGA8(10p)	CK+	3	3	1
Basal	T2A	Liver	H2AFJ(12p)	CD44+CD24+	6	3	2		TNBC	TNBC2_LN	ITGA8(10p)	CK+	4	2	2
Basal	T2A	Liver	H2AFJ(12p)	CD44+CD24+	7	2	3.5		TNBC	TNBC2_LN	ITGA8(10p)	CK+	2	1	2
Basal	T2A	Liver	H2AFJ(12p)	CD44+CD24+	10	5	2		TNBC	TNBC2_LN	ITGA8(10p)	CK+	2	2	1
Basal	T2A	Liver	H2AFJ(12p)	CD44+CD24+	7	1	7		TNBC	TNBC2_LN	ITGA8(10p)	CK+	2	1	2
Basal	T2A	Liver	H2AFJ(12p)	CD44+CD24+	9	4	2.25		TNBC	TNBC2_LN	ITGA8(10p)	CK+	2	2	1
Basal	T2A	Liver	H2AFJ(12p)	CD44+CD24+	2	2	1		TNBC	TNBC2_LN	ITGA8(10p)	CK+	2	1	2
Basal	T2A	Liver	H2AFJ(12p)	CD44+CD24+	7	4	1.75		TNBC	TNBC2_LN	ITGA8(10p)	CK+	1	1	1
Basal	T2A	Liver	H2AFJ(12p)	CD44-CD24+	2	1	2		TNBC	TNBC2_LN	ITGA8(10p)	CK+	5	2	2.5
Basal	T2A	Liver	H2AFJ(12p)	CD44-CD24+	2	2	1		TNBC	TNBC2_LN	ITGA8(10p)	CK+	4	4	1
Basal	T2A	Liver	H2AFJ(12p)	CD44-CD24+	5	4	1.25		TNBC	TNBC2_LN	ITGA8(10p)	CK+	1	2	0.5
Basal	T2A	Liver	H2AFJ(12p)	CD44-CD24+	3	3	1		TNBC	TNBC2_LN	ITGA8(10p)	CK+	2	2	1
Basal	T2A	Liver	H2AFJ(12p)	CD44-CD24+	3	3	1		TNBC	TNBC2_LN	ITGA8(10p)	CK+	2	2	1
Basal	T2A	Liver	H2AFJ(12p)	CD44-CD24+	1	2	0.5		TNBC	TNBC2_LN	ITGA8(10p)	CK+	1	1	1
Basal	T2A	Liver	H2AFJ(12p)	CD44-CD24+	3	1	3		TNBC	TNBC2_LN	ITGA8(10p)	CK+	4	2	2
Basal	T2A	Liver	H2AFJ(12p)	CD44-CD24+	10	3	3.33333		TNBC	TNBC2_LN	ITGA8(10p)	CK+	4	2	2
Basal	T2A	Liver	H2AFJ(12p)	CD44-CD24+	8	3	2.66667		TNBC	TNBC2_LN	ITGA8(10p)	CK+	1	1	1
Basal	T2A	Liver	H2AFJ(12p)	CD44-CD24+	4	4	1		TNBC	TNBC2_LN	ITGA8(10p)	CK+	1	1	1
Basal	T2A	Liver	H2AFJ(12p)	CD44-CD24+	6	1	6		TNBC	TNBC2_LN	ITGA8(10p)	CK+	0	1	0
Basal	T2A	Liver	H2AFJ(12p)	CD44-CD24+	9	2	4.5		TNBC	TNBC2_LN	ITGA8(10p)	CK+	1	1	1
Basal	T2A	Liver	H2AFJ(12p)	CD44-CD24+	5	1	5		TNBC	TNBC2_LN	ITGA8(10p)	CK+	4	3	1.33333
Basal	T2A	Liver	H2AFJ(12p)	CD44-CD24+	6	3	2		TNBC	TNBC2_LN	ITGA8(10p)	CK+	2	2	1
Basal	T2A	Liver	H2AFJ(12p)	CD44-CD24+	9	3	3		TNBC	TNBC2_LN	ITGA8(10p)	CK+	1	1	1
Basal	T2A	Liver	H2AFJ(12p)	CD44-CD24+	9	4	2.25		TNBC	TNBC2_LN	ITGA8(10p)	CK+	1	1	1
Basal	T2A	Liver	H2AFJ(12p)	CD44-CD24+	4	2	2		TNBC	TNBC2_LN	ITGA8(10p)	CK+	1	1	1
Basal	T2A	Liver	H2AFJ(12p)	CD44-CD24+	12	2	6		TNBC	TNBC2_LN	ITGA8(10p)	CK+	2	1	2
Basal	T2A	Liver	H2AFJ(12p)	CD44-CD24+	6	4	1.5		TNBC	TNBC2_LN	ITGA8(10p)	CK+	3	2	1.5
Basal	T2A	Liver	H2AFJ(12p)	CD44-CD24+	6	3	2		TNBC	TNBC2_LN	ITGA8(10p)	CK+	2	2	1
Basal	T2A	Liver	H2AFJ(12p)	CD44-CD24+	5	4	1.25		TNBC	TNBC2_LN	621K(8q)	CK+	1	1	1
Basal	T2A	Liver	H2AFJ(12p)	CD44-CD24+	6	2	3		TNBC	TNBC2_LN	621K(8q)	CK+	1	1	1
Basal	T2A	Liver	H2AFJ(12p)	CD44-CD24+	2	2	1		TNBC	TNBC2_LN	621K(8q)	CK+	1	1	1
Basal	T2A	Liver	H2AFJ(12p)	CD44-CD24+	10	4	2.5		TNBC	TNBC2_LN	621K(8q)	CK+	1	1	1
Basal	T2A	Liver	H2AFJ(12p)	CD44-CD24+	3	2	1.5		TNBC	TNBC2_LN	621K(8q)	CK+	2	2	1
Basal	T2A	Liver	H2AFJ(12p)	CD44-CD24+	3	1	3		TNBC	TNBC2_LN	621K(8q)	CK+	1	1	1
Basal	T2A	Liver	H2AFJ(12p)	CD44-CD24+	1	1	1		TNBC	TNBC2_LN	621K(8q)	CK+	2	2	1
Basal	T2A	Liver	H2AFJ(12p)	CD44-CD24+	6	3	2		TNBC	TNBC2_LN	621K(8q)	CK+	1	1	1
Basal	T2A	Liver	H2AFJ(12p)	CD44-CD24+	6	2	3		TNBC	TNBC2_LN	621K(8q)	CK+	2	2	1
Basal	T2A	Liver	H2AFJ(12p)	CD44-CD24+	2	1	2		TNBC	TNBC2_LN	621K(8q)	CK+	2	1	2
Basal	T2A	Liver	H2AFJ(12p)	CD44-CD24+	12	3	4		TNBC	TNBC2_LN	621K(8q)	CK+	1	1	1
Basal	T2A	Liver	H2AFJ(12p)	CD44-CD24+	8	5	1.6		TNBC	TNBC2_LN	621K(8q)	CK+	2	2	1
Basal	T2A	Liver	H2AFJ(12p)	CD44-CD24+	11	5	2.2		TNBC	TNBC2_LN	621K(8q)	CK+	1	1	1
Basal	T2A	Liver	H2AFJ(12p)	CD44-CD24+	4	2	2		TNBC	TNBC2_LN	621K(8q)	CK+	2	2	1
Basal	T2A	Liver	H2AFJ(12p)	CD44-CD24+	6	2	3		TNBC	TNBC2_LN	621K(8q)	CK+	1	1	1
Basal	T2A	Liver	H2AFJ(12p)	CD44-CD24+	15	5	3		TNBC	TNBC2_LN	621K(8q)	CK+	1	1	1
Basal	T2A	Liver	H2AFJ(12p)	CD44-CD24+	2	1	2		TNBC	TNBC2_LN	621K(8q)	CK+	2	2	1
Basal	T2A	Liver	H2AFJ(12p)	CD44-CD24+	9	3	3		TNBC	TNBC2_LN	621K(8q)	CK+	2	2	1
Basal	T2A	Liver	H2AFJ(12p)	CD44-CD24+	2	1	2		TNBC	TNBC2_LN	621K(8q)	CK+	1	1	1
Basal	T2A	Liver	H2AFJ(12p)	CD44-CD24+	2	1	2		TNBC	TNBC2_LN	621K(8q)	CK+	1	1	1
Basal	T2A	Liver	H2AFJ(12p)	CD44-CD24+	11	4	2.75		TNBC	TNBC2_LN	621K(8q)	CK+	3	2	1.5
Basal	T2A	Liver	H2AFJ(12p)	CD44-CD24+	5	3	1.66667		TNBC	TNBC2_LN	621K(8q)	CK+	1	1	1
Basal	T2A	Liver	H2AFJ(12p)	CD44-CD24+	5	1	5		TNBC	TNBC2_LN	621K(8q)	CK+	1	1	1
Basal	T2A	Liver	H2AFJ(12p)	CD44-CD24+	2	2	1		TNBC	TNBC2_LN	621K(8q)	CK+	1	1	1
Basal	T2A	Liver	H2AFJ(12p)	CD44-CD24+	10	3	3.33333		TNBC	TNBC2_LN	621K(8q)	CK+	1	1	1
Basal	T2A	Liver	H2AFJ(12p)	CD44-CD24+	3	2	1.5		TNBC	TNBC2_LN	621K(8q)	CK+	2	2	1
Basal	T2A	Liver	H2AFJ(12p)	CD44-CD24+	5	1	5		TNBC	TNBC2_LN	621K(8q)	CK+	1	1	1
Basal	T2A	Liver	H2AFJ(12p)	CD44-CD24+	4	2	2		TNBC	TNBC2_LN	621K(8q)	CK+	0	1	0
Basal	T2A	Liver	H2AFJ(12p)	CD44-CD24+	4	2	2		TNBC	TNBC2_LN	621K(8q)	CK+	2	2	1
Basal	T2A	Liver	H2AFJ(12p)	CD44-CD24+	3	3	1		TNBC	TNBC2_LN	621K(8q)	CK+	4	4	1
Basal	T2A	Liver	H2AFJ(12p)	CD44-CD24+	7	3	2.33333		TNBC	TNBC2_LN	621K(8q)	CK+	2	1	2
Basal	T2A	Liver	H2AFJ(12p)	CD44-CD24+	6	4	1.5		TNBC	TNBC2_LN	621K(8q)	CK+	1	2	0.5
Basal	T2A	Liver	H2AFJ(12p)	CD44-CD24+	9	5	1.8		TNBC	TNBC2_LN	621K(8q)	CK+	3	2	1.5
Basal	T2A	Liver	H2AFJ(12p)	CD44-CD24+	8	4	2		TNBC	TNBC2_LN	621K(8q)	CK+	2	1	2
Basal	T2A	Liver	H2AFJ(12p)	CD44-CD24+	9	3	3		TNBC	TNBC2_LN	621K(8q)	CK+	2	2	1
Basal	T2A	Liver	H2AFJ(12p)	CD44-CD24+	7	2	3.5		TNBC	TNBC2_LN	621K(8q)	CK+	2	2	1
Basal	T2A	Liver	H2AFJ(12p)	CD44-CD24+	4	2	2		TNBC	TNBC2_LN	621K(8q)	CK+	2	2	1
Basal	T2A	Liver	H2AFJ(12p)	CD44-CD24+	3	2	1.5		TNBC	TNBC2_LN	621K(8q)	CK+	2	1	2
Basal	T2A	Liver	H2AFJ(12p)	CD44-CD24+	3	2	1.5		TNBC	TNBC2_LN	621K(8q)	CK+	3	3	1
Basal	T2A	Liver	H2AFJ(12p)	CD44-CD24+	4	2	2		TNBC	TNBC2_LN	621K(8q)	CK+	2	2	1
Basal	T2A	Liver	H2AFJ(12p)	CD44-CD24+	4	2	2		TNBC	TNBC2_LN	621K(8q)	CK+	1	1	1
Basal	T2A	Liver	H2AFJ(12p)	CD44-CD24+	4	4	1		TNBC	TNBC2_LN	621K(8q)	CK+	2	2	1
Basal	T2A	Liver	H2AFJ(12p)	CD44-CD24+	3	1	3		TNBC	TNBC2_LN	621K(8q)	CK+	2	3	0.666667
Basal	T2A	Liver	H2AFJ(12p)	CD44-CD24+	4	2	2		TNBC	TNBC2_LN	621K(8q)	CK+	1	2	0.5
Basal	T2A	Liver	H2AFJ(12p)	CD44-CD24+	4	3	1.33333		TNBC	TNBC2_LN	621K(8q)	CK+	1	1	1
Basal	T2A	Liver	H2AFJ(12p)	CD44-CD24+	4	2	2		TNBC	TNBC2_LN	621K(8q)	CK+	1	1	1
Basal	T2A	Liver	H2AFJ(12p)	CD44-CD24+	5	2	2.5		TNBC	TNBC2_LN	621K(8q)	CK+	2	2	1
Basal	T2A	Liver	H2AFJ(12p)	CD44-CD24+	4	3	1.33333		TNBC	TNBC2_LN	621K(8q)	CK+	4	2	2
Basal	T2A	Liver	H2AFJ(12p)	CD44-CD24+	5	2	2.5		TNBC	TNBC2_LN	621K(8q)	CK+	2	3	0.666667
Basal	T2A	Liver	H2AFJ(12p)	CD44-CD24+	3	2	1.5		TNBC	TNBC2_LN	621K(8q)	CK+	1	1	1
Basal	T2A	Liver	H2AFJ(12p)	CD44-CD24+	4	2	2		TNBC	TNBC2_LN	621K(8q)	CK+	4	4	1
Basal	T2A	Liver	H2AFJ(12p)	CD44-CD24+	4	1	4		TNBC	TNBC2_LN	621K(8q)	CK+	3	3	1
Basal	T2A	Liver	H2AFJ(12p)	CD44-CD24+	7	3	2.33333		TNBC	TNBC2_LN	621K(8q)	CK+	1	1	1
Basal	T2A	Liver	H2AFJ(12p)	CD44-CD24+	3	2	1.5		TNBC	TNBC2_LN	621K(8q)	CK+	2	2	1
Basal	T2A	Liver	H2AFJ(12p)	CD44-CD24+	3	3	1		TNBC	TNBC2_LN	621K(8q)	CK+	3	2	1.5
Basal	T2A	Liver	H2AFJ(12p)	CD44-CD24+	5	1	5		TNBC	TNBC2_LN	621K(8q)	CK+	2	2	1
Basal	T2A	Liver	H2AFJ(12p)	CD44-CD24+	6	3	2		TNBC	TNBC2_LN	621K(8q)	CK+	2	2	1
Basal	T2A	Liver	H2AFJ(12p)	CD44-CD24+	4	2	2		TNBC	TNBC2_LN	621K(8q)	CK+	1	1	1
Basal	T2A	Liver	H2AFJ(12p)	CD44-CD24+	3	2	1.5		TNBC	TNBC2_LN	621K(8q)	CK+	3	2	1.5
Basal	T2A	Liver	H2AFJ(12p)	CD44-CD24+	4	3	1.33333		TNBC	TNBC2_LN	621K(8q)	CK+	1	1	1
Basal	T2A	Liver	H2AFJ(12p)	CD44-CD24+	5	4	1.25		TNBC	TNBC2_LN	621K(8q)	CK+	1	1	1
Basal	T2A	Liver	H2AFJ(12p)	CD44-CD24+	6	3	2		TNBC	TNBC2_LN	621K(8q)	CK+	3	2	1.5
Basal	T2A	Liver	H2AFJ(12p)	CD44-CD24+	7	2	3.5		TNBC	TNBC2_LN	621K(8q)	CK+	1	2	0.5
Basal	T2A	Liver	H2AFJ(12p)	CD44-CD24+	3	3	1		TNBC	TNBC2_LN	621K(8q)	CK+	2	2	1
Basal	T2A	Liver	H2AFJ(12p)	CD44-CD24+	2	2	1		TNBC	TNBC2_LN	621K(8q)	CK+	5	3	1.66667
Basal	T2A	Liver	H2AFJ(12p)	CD44-CD24+	8	3	2.66667		TNBC	TNBC2_LN	621K(8q)	CK+	1	2	0.5
Basal	T2A	Liver	H2AFJ(12p)	CD44-CD24+	11	5	2.2		TNBC	TNBC2_LN	621K(8q)	CK+	0	1	0
Basal	T2A	Liver	H2AFJ(12p)	CD44-CD24+	6	2	3		TNBC	TNBC2_LN	621K(8q)	CK+	0	1	0
Basal	T2A	Liver	H2AFJ(12p)	CD44-CD24+	6	3	2		TNBC	TNBC2_LN	621K(8q)	CK+	1	1	1
Basal	T2A	Liver	H2AFJ(12p)	CD44-CD24+	4	3	1.33333		TNBC	TNBC2_LN	621K(8q)	CK+	2	2	1
Basal	T2A	Liver	H2AFJ(12p)	CD44-CD24+	4	3	1.33333		TNBC	TNBC2_LN	621K(8q)	CK+	3	3	1
Basal	T2A	Liver	H2AFJ(12p)	CD44-CD24+	5	3	1.66667		TNBC	TNBC2_LN	621K(8q)	CK+	3	2	1.5
Basal	T2A	Liver	H2AFJ(12p)	CD44-CD24+	3	3	1		TNBC	TNBC2_LN	621K(8q)	CK+	2	2	1
Basal	T2A	Liver	H2AFJ(12p)	CD44-CD24+	3	1	3		TNBC	TNBC2_LN	621K(8q)	CK+	2	2	1
Basal	T2A	Liver	H2AFJ(12p)	CD44-CD24+	5	3	1.66667		TNBC	TNBC2_LN	621K(8q)	CK+	1	1	1
Basal	T2A	Liver	H2AFJ(12p)	CD44-CD24+	3	3	1		TNBC	TNBC2_LN	621K(8q)	CK+	2	1	2
Basal	T2A	Liver	H2AFJ(12p)	CD44-CD24+	3	1	3		TNBC	TNBC2_LN	621K(8q)	CK+	2	2	1
Basal	T2A	Liver	H2AFJ(12p)	CD44-CD24+	5	3	1.66667		TNBC	TNBC2_LN	621K(8q)	CK+	2	2	1
Basal	T2A	Liver	H2AFJ(12p)	CD44-CD24+	2	1	2		TNBC	TNBC2_LN	621K(8q)	CK+	1	1	1
Basal	T2A	Liver	H2AFJ(12p)	CD44-CD24+	2	1	2		TNBC	TNBC2_LN	621K(8q)	CK+	4	4	1
Basal	T2A	Liver	H2AFJ(12p)	CD44-CD24-	1	1	1		TNBC	TNBC2_LN	621K(8q)	CK+	2	2	1
Basal	T2A	Liver	H2AFJ(12p)	CD44-CD24-	1	1	1		TNBC	TNBC2_LN	621K(8q)	CK+	2	2	1
Basal	T2A	Liver	H2AFJ(12p)	CD44-CD24-	1	1	1		TNBC	TNBC2_LN	621K(8q)	CK+	1	1	1
Basal	T2A	Liver	H2AFJ(12p)	CD44-CD24-	3	3	1		TNBC	TNBC2_LN	621K(8q)	CK+	2	2	1
Basal	T2A	Liver	H2AFJ(12p)	CD44-CD24-	1	1	1		TNBC	TNBC2_LN	621K(8q)	CK+	1	1	1
Basal	T2A	Liver	H2AFJ(12p)	CD44-CD24-	1	3	0.333333		TNBC	TNBC2_LN	621K(8q)	CK+	3	2	1.5
Basal	T2A	Liver	H2AFJ(12p)	CD44-CD24-	3	4	0.75		TNBC	TNBC2_LN	621K(8q)	CK+	1	1	1
Basal	T2A	Liver	H2AFJ(12p)	CD44-CD24-	3	2	1.5		TNBC	TNBC2_LN	621K(8q)	CK+	1	1	1
Basal	T2A	Liver	H2AFJ(12p)	CD44-CD24-	1	1	1		TNBC	TNBC2_LN	621K(8q)	CK+	1	1	1
Basal	T2A	Liver	H2AFJ(12p)	CD44-CD24-	2	1	2		TNBC	TNBC2_LN	621K(8q)	CK+	1	1	1
Basal	T2A	Liver	H2AFJ(12p)	CD44-CD24-	2	3	0.666667		TNBC	TNBC2_LN	621K(8q)	CK+	1	1	1
Basal	T2A	Liver	H2AFJ(12p)	CD44-CD24-	2	1	2		TNBC	TNBC2_LN	621K(8q)	CK+	3	2	1.5
Basal	T2A	Liver	H2AFJ(12p)	CD44-CD24-	4	2	2		TNBC	TNBC2_LN	621K(8q)	CK+	2	1	2
Basal	T2A	Liver	H2AFJ(12p)	CD44-CD24-	6	1	6		TNBC	TNBC2_LN	621K(8q)	CK+	3	2	1.5
Basal	T2A	Liver	H2AFJ(12p)	CD44-CD24-	4	2	2		TNBC	TNBC2_LN	621K(8q)	CK+	1	1	1
Basal	T2A	Liver	H2AFJ(12p)	CD44-CD24-	10	2	5		TNBC	TNBC2_LN	621K(8q)	CK+	2	2	1
Basal	T2A	Liver	H2AFJ(12p)	CD44-CD24-	5	4	1.25		TNBC	TNBC2_LN	621K(8q)	CK+	1	1	1
Basal	T2A	Liver	H2AFJ(12p)	CD44-CD24-	5	2	2.5		TNBC	TNBC2_LN	621K(8q)	CK+	2	3	0.666667
Basal	T2A	Liver	H2AFJ(12p)	CD44-CD24-	9	3	3		TNBC	TNBC2_LN	621K(8q)	CK+	0	1	0
Basal	T2A	Liver	H2AFJ(12p)	CD44-CD24-	10	3	3.33333		TNBC	TNBC2_LN	621K(8q)	CK+	1	1	1
Basal	T2A	Liver	H2AFJ(12p)	CD44-CD24-	6	2	3		TNBC	TNBC4_PR	H2AFJ(12p)	CD44+CD24-	3	3	1
Basal	T2A	Liver	H2AFJ(12p)	CD44-CD24-	8	4	2		TNBC	TNBC4_PR	H2AFJ(12p)	CD44+CD24-	1	1	1
Basal	T2A	Liver	H2AFJ(12p)	CD44-CD24-	9	3	3		TNBC	TNBC4_PR	H2AFJ(12p)	CD44+CD24-	1	1	1
Basal	T2A	Liver	H2AFJ(12p)	CD44-CD24-	2	1	2		TNBC	TNBC4_PR	H2AFJ(12p)	CD44+CD24-	0	1	0
Basal	T2A	Liver	H2AFJ(12p)	CD44-CD24-	3	1	3		TNBC	TNBC4_PR	H2AFJ(12p)	CD44+CD24-	1	1	1
Basal	T2A	Liver	H2AFJ(12p)	CD44-CD24-	3	3	1		TNBC	TNBC4_PR	H2AFJ(12p)	CD44+CD24-	1	1	1
Basal	T2A	Liver	H2AFJ(12p)	CD44-CD24-	2	2	1		TNBC	TNBC4_PR	H2AFJ(12p)	CD44+CD24-	2	2	1
Basal	T2A	Liver	H2AFJ(12p)	CD44-CD24-	3	2	1.5		TNBC	TNBC4_PR	H2AFJ(12p)	CD44+CD24-	2	1	2
Basal	T2A	Liver	H2AFJ(12p)	CD44-CD24-	2	2	1		TNBC	TNBC4_PR	H2AFJ(12p)	CD44+CD24-	1	1	1
Basal	T2A	Liver	H2AFJ(12p)	CD44-CD24-	2	2	1		TNBC	TNBC4_PR	H2AFJ(12p)	CD44+CD24-	1	1	1
Basal	T2A	Liver	H2AFJ(12p)	CD44-CD24-	2	2	1		TNBC	TNBC4_PR	H2AFJ(12p)	CD44+CD24-	1	1	1
Basal	T2A	Liver	H2AFJ(12p)	CD44-CD24-	7	3	2.33333		TNBC	TNBC4_PR	H2AFJ(12p)	CD44+CD24-	1	1	1
Basal	T2A	Liver	H2AFJ(12p)	CD44-CD24-	5	3	1.66667		TNBC	TNBC4_PR	H2AFJ(12p)	CD44+CD24-	1	1	1
Basal	T2A	Liver	H2AFJ(12p)	CD44-CD24-	5	2	2.5		TNBC	TNBC4_PR	H2AFJ(12p)	CD44+CD24-	1	1	1
Basal	T2A	Liver	H2AFJ(12p)	CD44-CD24-	3	2	1.5		TNBC	TNBC4_PR	H2AFJ(12p)	CD44+CD24-	2	2	1
Basal	T2A	Liver	H2AFJ(12p)	CD44-CD24-	3	2	1.5		TNBC	TNBC4_PR	H2AFJ(12p)	CD44+CD24-	1	2	0.5
Basal	T2A	Liver	H2AFJ(12p)	CD44-CD24-	11	5	2.2		TNBC	TNBC4_PR	H2AFJ(12p)	CD44+CD24-	1	2	0.5
Basal	T2A	Liver	H2AFJ(12p)	CD44-CD24-	6	2	3		TNBC	TNBC4_PR	H2AFJ(12p)	CD44+CD24-	1	1	1
Basal	T2A	Liver	H2AFJ(12p)	CD44-CD24-	6	1	6		TNBC	TNBC4_PR	H2AFJ(12p)	CD44+CD24-	1	2	0.5
Basal	T2A	Liver	H2AFJ(12p)	CD44-CD24-	6	2	3		TNBC	TNBC4_PR	H2AFJ(12p)	CD44+CD24-	2	2	1
Basal	T2A	Liver	H2AFJ(12p)	CD44-CD24-	6	3	2		TNBC	TNBC4_PR	H2AFJ(12p)	CD44+CD24-	1	1	1
Basal	T2A	Liver	H2AFJ(12p)	CD44-CD24-	5	2	2.5		TNBC	TNBC4_PR	H2AFJ(12p)	CD44+CD24-	1	1	1
Basal	T2A	Liver	H2AFJ(12p)	CD44-CD24-	7	2	3.5		TNBC	TNBC4_PR	H2AFJ(12p)	CD44+CD24-	0	1	0
Basal	T2A	Liver	H2AFJ(12p)	CD44-CD24-	6	2	3		TNBC	TNBC4_PR	H2AFJ(12p)	CD44+CD24-	2	2	1
Basal	T2A	Liver	H2AFJ(12p)	CD44-CD24-	2	2	1		TNBC	TNBC4_PR	H2AFJ(12p)	CD44+CD24-	0	1	0
Basal	T2A	Liver	H2AFJ(12p)	CD44-CD24-	9	2	4.5		TNBC	TNBC4_PR	H2AFJ(12p)	CD44+CD24-	2	2	1
Basal	T2A	Liver	H2AFJ(12p)	CD44-CD24-	5	3	1.66667		TNBC	TNBC4_PR	H2AFJ(12p)	CD44+CD24-	3	2	1.5
Basal	T2A	Liver	H2AFJ(12p)	CD44-CD24-	6	2	3		TNBC	TNBC4_PR	H2AFJ(12p)	CD44+CD24-	1	1	1
Basal	T2A	Liver	H2AFJ(12p)	CD44-CD24-	4	2	2		TNBC	TNBC4_PR	H2AFJ(12p)	CD44+CD24-	1	1	1
Basal	T2A	Liver	H2AFJ(12p)	CD44-CD24-	6	1	6		TNBC	TNBC4_PR	H2AFJ(12p)	CD44+CD24-	1	1	1
Basal	T2A	Liver	H2AFJ(12p)	CD44-CD24-	7	5	1.4		TNBC	TNBC4_PR	H2AFJ(12p)	CD44+CD24-	2	2	1
Basal	T2A	Liver	H2AFJ(12p)	CD44-CD24-	3	2	1.5		TNBC	TNBC4_PR	H2AFJ(12p)	CD44+CD24-	2	2	1
Basal	T2A	Liver	H2AFJ(12p)	CD44-CD24-	2	3	0.666667		TNBC	TNBC4_PR	H2AFJ(12p)	CD44+CD24-	2	2	1
Basal	T2A	Liver	H2AFJ(12p)	CD44-CD24-	5	2	2.5		TNBC	TNBC4_PR	H2AFJ(12p)	CD44+CD24-	2	2	1
Basal	T2A	Liver	H2AFJ(12p)	CD44-CD24-	5	1	5		TNBC	TNBC4_PR	H2AFJ(12p)	CD44+CD24-	0	1	0
Basal	T2A	Liver	H2AFJ(12p)	CD44-CD24-	6	3	2		TNBC	TNBC4_PR	H2AFJ(12p)	CD44+CD24-	1	1	1
Basal	T2A	Liver	H2AFJ(12p)	CD44-CD24-	1	1	1		TNBC	TNBC4_PR	H2AFJ(12p)	CD44+CD24-	2	2	1
Basal	T2A	Liver	H2AFJ(12p)	CD44-CD24-	6	1	6		TNBC	TNBC4_PR	H2AFJ(12p)	CD44+CD24-	1	1	1
Basal	T2A	Liver	H2AFJ(12p)	CD44-CD24-	4	1	4		TNBC	TNBC4_PR	H2AFJ(12p)	CD44+CD24-	2	2	1
Basal	T2A	Liver	H2AFJ(12p)	CD44-CD24-	6	3	2		TNBC	TNBC4_PR	H2AFJ(12p)	CD44+CD24-	2	2	1
Basal	T2A	Liver	H2AFJ(12p)	CD44-CD24-	5	3	1.66667		TNBC	TNBC4_PR	H2AFJ(12p)	CD44+CD24-	1	1	1
Basal	T2A	Liver	H2AFJ(12p)	CD44-CD24-	5	2	2.5		TNBC	TNBC4_PR	H2AFJ(12p)	CD44+CD24-	1	1	1
Basal	T2A	Liver	H2AFJ(12p)	CD44-CD24-	4	3	1.33333		TNBC	TNBC4_PR	H2AFJ(12p)	CD44+CD24-	2	2	1
Basal	T2A	Liver	H2AFJ(12p)	CD44-CD24-	6	2	3		TNBC	TNBC4_PR	H2AFJ(12p)	CD44+CD24-	1	1	1
Basal	T2A	Liver	H2AFJ(12p)	CD44-CD24-	6	2	3		TNBC	TNBC4_PR	H2AFJ(12p)	CD44+CD24-	1	1	1
Basal	T2A	Liver	H2AFJ(12p)	CD44-CD24-	7	2	3.5		TNBC	TNBC4_PR	H2AFJ(12p)	CD44+CD24-	2	2	1
Basal	T2A	Liver	H2AFJ(12p)	CD44-CD24-	3	1	3		TNBC	TNBC4_PR	H2AFJ(12p)	CD44+CD24-	1	2	0.5
Basal	T2A	Liver	H2AFJ(12p)	CD44-CD24-	8	3	2.66667		TNBC	TNBC4_PR	H2AFJ(12p)	CD44+CD24-	1	2	0.5
Basal	T2A	Liver	H2AFJ(12p)	CD44-CD24-	7	3	2.33333		TNBC	TNBC4_PR	H2AFJ(12p)	CD44+CD24-	1	1	1
Basal	T2A	Liver	H2AFJ(12p)	CD44-CD24-	4	3	1.33333		TNBC	TNBC4_PR	H2AFJ(12p)	CD44+CD24-	1	2	0.5
Basal	T2A	Liver	H2AFJ(12p)	CD44-CD24-	4	1	4		TNBC	TNBC4_PR	H2AFJ(12p)	CD44+CD24-	1	1	1
Basal	T2A	Liver	H2AFJ(12p)	CD44-CD24-	1	1	1		TNBC	TNBC4_PR	H2AFJ(12p)	CD44+CD24-	0	1	0
Basal	T2A	Liver	H2AFJ(12p)	CD44-CD24-	6	1	6		TNBC	TNBC4_PR	H2AFJ(12p)	CD44+CD24-	1	2	0.5
Basal	T2A	Liver	H2AFJ(12p)	CD44-CD24-	9	2	4.5		TNBC	TNBC4_PR	H2AFJ(12p)	CD44+CD24-	2	2	1
Basal	T2A	Liver	H2AFJ(12p)	CD44-CD24-	7	1	7		TNBC	TNBC4_PR	H2AFJ(12p)	CD44+CD24-	1	1	1
Basal	T2A	Liver	H2AFJ(12p)	CD44-CD24-	6	2	3		TNBC	TNBC4_PR	H2AFJ(12p)	CD44+CD24-	1	2	0.5
Basal	T2A	Liver	H2AFJ(12p)	CD44-CD24-	4	1	4		TNBC	TNBC4_PR	H2AFJ(12p)	CD44+CD24-	4	2	2
Basal	T2A	Liver	H2AFJ(12p)	CD44-CD24-	8	3	2.66667		TNBC	TNBC4_PR	H2AFJ(12p)	CD44+CD24-	2	2	1
Basal	T2A	Liver	H2AFJ(12p)	CD44-CD24-	12	7	1.71429		TNBC	TNBC4_PR	H2AFJ(12p)	CD44+CD24-	1	1	1
Basal	T2A	Liver	H2AFJ(12p)	CD44-CD24-	2	2	1		TNBC	TNBC4_PR	H2AFJ(12p)	CD44+CD24-	2	2	1
Basal	T2A	Liver	H2AFJ(12p)	CD44-CD24-	12	3	4		TNBC	TNBC4_PR	H2AFJ(12p)	CD44+CD24-	3	2	1.5
Basal	T2A	Liver	H2AFJ(12p)	CD44-CD24-	3	1	3		TNBC	TNBC4_PR	H2AFJ(12p)	CD44+CD24-	2	2	1
Basal	T2A	Liver	H2AFJ(12p)	CD44-CD24-	3	1	3		TNBC	TNBC4_PR	H2AFJ(12p)	CD44+CD24-	1	1	1
Basal	T2A	Liver	H2AFJ(12p)	CD44-CD24-	4	2	2		TNBC	TNBC4_PR	H2AFJ(12p)	CD44+CD24-	1	1	1
Basal	T2A	Liver	H2AFJ(12p)	CD44-CD24-	9	3	3		TNBC	TNBC4_PR	H2AFJ(12p)	CD44+CD24-	1	1	1
Basal	T2A	Liver	H2AFJ(12p)	CD44-CD24-	4	3	1.33333		TNBC	TNBC4_PR	H2AFJ(12p)	CD44+CD24-	1	1	1
Basal	T2A	Liver	H2AFJ(12p)	CD44-CD24-	9	3	3		TNBC	TNBC4_PR	H2AFJ(12p)	CD44+CD24-	2	2	1
Basal	T2A	Liver	H2AFJ(12p)	CD44-CD24-	2	1	2		TNBC	TNBC4_PR	H2AFJ(12p)	CD44+CD24-	1	1	1
Basal	T2A	Liver	H2AFJ(12p)	CD44-CD24-	4	2	2		TNBC	TNBC4_PR	H2AFJ(12p)	CD44+CD24-	1	1	1
Basal	T2A	Liver	H2AFJ(12p)	CD44-CD24-	4	1	4		TNBC	TNBC4_PR	H2AFJ(12p)	CD44+CD24-	1	1	1
Basal	T2A	Liver	H2AFJ(12p)	CD44-CD24-	23	6	3.83333		TNBC	TNBC4_PR	H2AFJ(12p)	CD44+CD24-	2	2	1
Basal	T2A	Liver	H2AFJ(12p)	CD44-CD24-	4	3	1.33333		TNBC	TNBC4_PR	H2AFJ(12p)	CD44+CD24-	1	1	1
Basal	T2A	Liver	H2AFJ(12p)	CD44-CD24-	4	3	1.33333		TNBC	TNBC4_PR	H2AFJ(12p)	CD44+CD24-	2	2	1
Basal	T2A	Liver	H2AFJ(12p)	CD44-CD24-	2	2	1		TNBC	TNBC4_PR	H2AFJ(12p)	CD44+CD24-	1	1	1
Basal	T2A	Liver	H2AFJ(12p)	CD44-CD24-	7	2	3.5		TNBC	TNBC4_PR	H2AFJ(12p)	CD44+CD24-	1	1	1
Basal	T2A	Liver	H2AFJ(12p)	CD44-CD24-	9	4	2.25		TNBC	TNBC4_PR	H2AFJ(12p)	CD44+CD24-	2	2	1
Basal	T2A	Liver	H2AFJ(12p)	CD44-CD24-	1	2	0.5		TNBC	TNBC4_PR	H2AFJ(12p)	CD44+CD24-	1	1	1
Basal	T2A	Liver	H2AFJ(12p)	CD44-CD24-	4	1	4		TNBC	TNBC4_PR	H2AFJ(12p)	CD44+CD24-	1	1	1
Basal	T2A	Liver	H2AFJ(12p)	CD44-CD24-	7	1	7		TNBC	TNBC4_PR	H2AFJ(12p)	CD44+CD24-	3	2	1.5
Basal	T2A	Liver	H2AFJ(12p)	CD44-CD24-	3	3	1		TNBC	TNBC4_PR	H2AFJ(12p)	CD44+CD24-	2	1	2
Basal	T2A	Liver	ITGA8(10p)	CD44+CD24-	2	2	1		TNBC	TNBC4_PR	H2AFJ(12p)	CD44+CD24-	0	1	0
Basal	T2A	Liver	ITGA8(10p)	CD44+CD24-	2	2	1		TNBC	TNBC4_PR	H2AFJ(12p)	CD44+CD24-	1	1	1
Basal	T2A	Liver	ITGA8(10p)	CD44+CD24-	4	3	1.33333		TNBC	TNBC4_PR	H2AFJ(12p)	CD44+CD24-	1	2	0.5
Basal	T2A	Liver	ITGA8(10p)	CD44+CD24-	5	5	1		TNBC	TNBC4_PR	H2AFJ(12p)	CD44+CD24-	1	1	1
Basal	T2A	Liver	ITGA8(10p)	CD44+CD24-	5	2	2.5		TNBC	TNBC4_PR	H2AFJ(12p)	CD44+CD24-	2	1	2
Basal	T2A	Liver	ITGA8(10p)	CD44+CD24-	3	3	1		TNBC	TNBC4_PR	H2AFJ(12p)	CD44+CD24-	1	1	1
Basal	T2A	Liver	ITGA8(10p)	CD44+CD24-	3	4	0.75		TNBC	TNBC4_PR	H2AFJ(12p)	CD44+CD24-	2	2	1
Basal	T2A	Liver	ITGA8(10p)	CD44+CD24-	2	4	0.5		TNBC	TNBC4_PR	H2AFJ(12p)	CD44+CD24-	3	3	1
Basal	T2A	Liver	ITGA8(10p)	CD44+CD24-	4	2	2		TNBC	TNBC4_PR	H2AFJ(12p)	CD44+CD24-	1	2	0.5
Basal	T2A	Liver	ITGA8(10p)	CD44+CD24-	3	4	0.75		TNBC	TNBC4_PR	H2AFJ(12p)	CD44+CD24-	1	1	1
Basal	T2A	Liver	ITGA8(10p)	CD44+CD24-	4	2	2		TNBC	TNBC4_PR	H2AFJ(12p)	CD44+CD24-	2	1	2
Basal	T2A	Liver	ITGA8(10p)	CD44+CD24-	3	2	1.5		TNBC	TNBC4_PR	H2AFJ(12p)	CD44+CD24-	3	2	1.5
Basal	T2A	Liver	ITGA8(10p)	CD44+CD24-	3	4	0.75		TNBC	TNBC4_PR	H2AFJ(12p)	CD44+CD24-	2	2	1
Basal	T2A	Liver	ITGA8(10p)	CD44+CD24-	2	1	2		TNBC	TNBC4_PR	H2AFJ(12p)	CD44+CD24-	1	1	1
Basal	T2A	Liver	ITGA8(10p)	CD44+CD24-	4	3	1.33333		TNBC	TNBC4_PR	H2AFJ(12p)	CD44+CD24-	1	1	1
Basal	T2A	Liver	ITGA8(10p)	CD44+CD24-	3	3	1		TNBC	TNBC4_PR	H2AFJ(12p)	CD44+CD24-	3	2	1.5
Basal	T2A	Liver	ITGA8(10p)	CD44+CD24-	1	1	1		TNBC	TNBC4_PR	H2AFJ(12p)	CD44+CD24-	2	2	1
Basal	T2A	Liver	ITGA8(10p)	CD44+CD24-	3	3	1		TNBC	TNBC4_PR	H2AFJ(12p)	CD44+CD24-	1	1	1
Basal	T2A	Liver	ITGA8(10p)	CD44+CD24-	5	5	1		TNBC	TNBC4_PR	H2AFJ(12p)	CD44+CD24-	1	1	1
Basal	T2A	Liver	ITGA8(10p)	CD44+CD24-	4	2	2		TNBC	TNBC4_PR	H2AFJ(12p)	CD44+CD24-	3	2	1.5
Basal	T2A	Liver	ITGA8(10p)	CD44+CD24-	2	1	2		TNBC	TNBC4_PR	ITGA8(10p)	CD44+CD24-	3	2	1.5
Basal	T2A	Liver	ITGA8(10p)	CD44+CD24-	5	4	1.25		TNBC	TNBC4_PR	ITGA8(10p)	CD44+CD24-	4	3	1.33333
Basal	T2A	Liver	ITGA8(10p)	CD44+CD24-	4	5	0.8		TNBC	TNBC4_PR	ITGA8(10p)	CD44+CD24-	5	5	1
Basal	T2A	Liver	ITGA8(10p)	CD44+CD24-	2	2	1		TNBC	TNBC4_PR	ITGA8(10p)	CD44+CD24-	1	1	1
Basal	T2A	Liver	ITGA8(10p)	CD44+CD24-	1	2	0.5		TNBC	TNBC4_PR	ITGA8(10p)	CD44+CD24-	2	2	1
Basal	T2A	Liver	ITGA8(10p)	CD44+CD24-	2	1	2		TNBC	TNBC4_PR	ITGA8(10p)	CD44+CD24-	1	2	0.5
Basal	T2A	Liver	ITGA8(10p)	CD44+CD24-	3	3	1		TNBC	TNBC4_PR	ITGA8(10p)	CD44+CD24-	3	1	3
Basal	T2A	Liver	ITGA8(10p)	CD44+CD24-	3	3	1		TNBC	TNBC4_PR	ITGA8(10p)	CD44+CD24-	3	4	0.75
Basal	T2A	Liver	ITGA8(10p)	CD44+CD24-	2	1	2		TNBC	TNBC4_PR	ITGA8(10p)	CD44+CD24-	2	1	2
Basal	T2A	Liver	ITGA8(10p)	CD44+CD24-	2	2	1		TNBC	TNBC4_PR	ITGA8(10p)	CD44+CD24-	2	3	0.666667
Basal	T2A	Liver	ITGA8(10p)	CD44+CD24-	4	3	1.33333		TNBC	TNBC4_PR	ITGA8(10p)	CD44+CD24-	3	1	3
Basal	T2A	Liver	ITGA8(10p)	CD44+CD24-	1	1	1		TNBC	TNBC4_PR	ITGA8(10p)	CD44+CD24-	4	2	2
Basal	T2A	Liver	ITGA8(10p)	CD44+CD24-	2	2	1		TNBC	TNBC4_PR	ITGA8(10p)	CD44+CD24-	5	3	1.66667
Basal	T2A	Liver	ITGA8(10p)	CD44+CD24-	12	12	1		TNBC	TNBC4_PR	ITGA8(10p)	CD44+CD24-	3	1	3
Basal	T2A	Liver	ITGA8(10p)	CD44+CD24-	5	4	1.25		TNBC	TNBC4_PR	ITGA8(10p)	CD44+CD24-	3	2	1.5
Basal	T2A	Liver	ITGA8(10p)	CD44+CD24-	4	3	1.33333		TNBC	TNBC4_PR	ITGA8(10p)	CD44+CD24-	4	1	4
Basal	T2A	Liver	ITGA8(10p)	CD44+CD24-	4	5	0.8		TNBC	TNBC4_PR	ITGA8(10p)	CD44+CD24-	4	1	4
Basal	T2A	Liver	ITGA8(10p)	CD44+CD24-	2	1	2		TNBC	TNBC4_PR	ITGA8(10p)	CD44+CD24-	3	1	3
Basal	T2A	Liver	ITGA8(10p)	CD44+CD24-	3	3	1		TNBC	TNBC4_PR	ITGA8(10p)	CD44+CD24-	3	3	1
Basal	T2A	Liver	ITGA8(10p)	CD44+CD24-	20	19	1.05263		TNBC	TNBC4_PR	ITGA8(10p)	CD44+CD24-	1	1	1
Basal	T2A	Liver	ITGA8(10p)	CD44+CD24-	5	4	1.25		TNBC	TNBC4_PR	ITGA8(10p)	CD44+CD24-	2	2	1
Basal	T2A	Liver	ITGA8(10p)	CD44+CD24-	2	1	2		TNBC	TNBC4_PR	ITGA8(10p)	CD44+CD24-	4	2	2
Basal	T2A	Liver	ITGA8(10p)	CD44+CD24-	4	3	1.33333		TNBC	TNBC4_PR	ITGA8(10p)	CD44+CD24-	4	2	2
Basal	T2A	Liver	ITGA8(10p)	CD44+CD24-	3	2	1.5		TNBC	TNBC4_PR	ITGA8(10p)	CD44+CD24-	2	2	1
Basal	T2A	Liver	ITGA8(10p)	CD44+CD24-	3	2	1.5		TNBC	TNBC4_PR	ITGA8(10p)	CD44+CD24-	3	3	1
Basal	T2A	Liver	ITGA8(10p)	CD44+CD24-	2	4	0.5		TNBC	TNBC4_PR	ITGA8(10p)	CD44+CD24-	1	1	1
Basal	T2A	Liver	ITGA8(10p)	CD44+CD24-	5	7	0.714286		TNBC	TNBC4_PR	ITGA8(10p)	CD44+CD24-	4	2	2
Basal	T2A	Liver	ITGA8(10p)	CD44+CD24-	2	2	1		TNBC	TNBC4_PR	ITGA8(10p)	CD44+CD24-	1	1	1
Basal	T2A	Liver	ITGA8(10p)	CD44+CD24-	2	1	2		TNBC	TNBC4_PR	ITGA8(10p)	CD44+CD24-	5	5	1
Basal	T2A	Liver	ITGA8(10p)	CD44+CD24-	1	3	0.333333		TNBC	TNBC4_PR	ITGA8(10p)	CD44+CD24-	2	1	2
Basal	T2A	Liver	ITGA8(10p)	CD44+CD24-	3	2	1.5		TNBC	TNBC4_PR	ITGA8(10p)	CD44+CD24-	1	1	1
Basal	T2A	Liver	ITGA8(10p)	CD44+CD24-	6	7	0.857143		TNBC	TNBC4_PR	ITGA8(10p)	CD44+CD24-	2	1	2
Basal	T2A	Liver	ITGA8(10p)	CD44+CD24-	4	4	1		TNBC	TNBC4_PR	ITGA8(10p)	CD44+CD24-	4	1	4
Basal	T2A	Liver	ITGA8(10p)	CD44+CD24-	1	2	0.5		TNBC	TNBC4_PR	ITGA8(10p)	CD44+CD24-	2	1	2
Basal	T2A	Liver	ITGA8(10p)	CD44+CD24-	6	6	1		TNBC	TNBC4_PR	ITGA8(10p)	CD44+CD24-	2	1	2
Basal	T2A	Liver	ITGA8(10p)	CD44+CD24-	6	4	1.5		TNBC	TNBC4_PR	ITGA8(10p)	CD44+CD24-	3	2	1.5
Basal	T2A	Liver	ITGA8(10p)	CD44+CD24-	6	7	0.857143		TNBC	TNBC4_PR	ITGA8(10p)	CD44+CD24-	1	1	1
Basal	T2A	Liver	ITGA8(10p)	CD44+CD24-	2	2	1		TNBC	TNBC4_PR	ITGA8(10p)	CD44+CD24-	2	2	1
Basal	T2A	Liver	ITGA8(10p)	CD44+CD24-	3	2	1.5		TNBC	TNBC4_PR	ITGA8(10p)	CD44+CD24-	4	4	1
Basal	T2A	Liver	ITGA8(10p)	CD44+CD24-	2	2	1		TNBC	TNBC4_PR	ITGA8(10p)	CD44+CD24-	1	1	1
Basal	T2A	Liver	ITGA8(10p)	CD44+CD24-	3	2	1.5		TNBC	TNBC4_PR	ITGA8(10p)	CD44+CD24-	2	2	1
Basal	T2A	Liver	ITGA8(10p)	CD44+CD24-	1	1	1		TNBC	TNBC4_PR	ITGA8(10p)	CD44+CD24-	1	1	1
Basal	T2A	Liver	ITGA8(10p)	CD44+CD24-	2	2	1		TNBC	TNBC4_PR	ITGA8(10p)	CD44+CD24-	2	2	1
Basal	T2A	Liver	ITGA8(10p)	CD44+CD24-	4	4	1		TNBC	TNBC4_PR	ITGA8(10p)	CD44+CD24-	1	1	1
Basal	T2A	Liver	ITGA8(10p)	CD44+CD24-	2	2	1		TNBC	TNBC4_PR	ITGA8(10p)	CD44+CD24-	3	2	1.5
Basal	T2A	Liver	ITGA8(10p)	CD44+CD24-	4	3	1.33333		TNBC	TNBC4_PR	ITGA8(10p)	CD44+CD24-	2	2	1
Basal	T2A	Liver	ITGA8(10p)	CD44+CD24-	5	4	1.25		TNBC	TNBC4_PR	ITGA8(10p)	CD44+CD24-	1	1	1
Basal	T2A	Liver	ITGA8(10p)	CD44+CD24-	4	1	4		TNBC	TNBC4_PR	ITGA8(10p)	CD44+CD24-	1	1	1
Basal	T2A	Liver	ITGA8(10p)	CD44+CD24-	4	3	1.33333		TNBC	TNBC4_PR	ITGA8(10p)	CD44+CD24-	2	2	1
Basal	T2A	Liver	ITGA8(10p)	CD44+CD24-	3	1	3		TNBC	TNBC4_PR	ITGA8(10p)	CD44+CD24-	2	2	1
Basal	T2A	Liver	ITGA8(10p)	CD44+CD24-	2	2	1		TNBC	TNBC4_PR	ITGA8(10p)	CD44+CD24-	2	2	1
Basal	T2A	Liver	ITGA8(10p)	CD44+CD24-	4	3	1.33333		TNBC	TNBC4_PR	ITGA8(10p)	CD44+CD24-	4	2	2
Basal	T2A	Liver	ITGA8(10p)	CD44+CD24-	5	4	1.25		TNBC	TNBC4_PR	ITGA8(10p)	CD44+CD24-	4	2	2
Basal	T2A	Liver	ITGA8(10p)	CD44+CD24-	2	2	1		TNBC	TNBC4_PR	ITGA8(10p)	CD44+CD24-	1	1	1
Basal	T2A	Liver	ITGA8(10p)	CD44+CD24-	3	2	1.5		TNBC	TNBC4_PR	ITGA8(10p)	CD44+CD24-	1	1	1
Basal	T2A	Liver	ITGA8(10p)	CD44+CD24-	7	7	1		TNBC	TNBC4_PR	ITGA8(10p)	CD44+CD24-	5	2	2.5
Basal	T2A	Liver	ITGA8(10p)	CD44+CD24-	3	2	1.5		TNBC	TNBC4_PR	ITGA8(10p)	CD44+CD24-	3	2	1.5
Basal	T2A	Liver	ITGA8(10p)	CD44+CD24-	4	2	2		TNBC	TNBC4_PR	ITGA8(10p)	CD44+CD24-	3	2	1.5
Basal	T2A	Liver	ITGA8(10p)	CD44+CD24-	1	1	1		TNBC	TNBC4_PR	ITGA8(10p)	CD44+CD24-	4	2	2
Basal	T2A	Liver	ITGA8(10p)	CD44+CD24-	2	2	1		TNBC	TNBC4_PR	ITGA8(10p)	CD44+CD24-	4	2	2
Basal	T2A	Liver	ITGA8(10p)	CD44+CD24-	4	3	1.33333		TNBC	TNBC4_PR	ITGA8(10p)	CD44+CD24-	3	1	3
Basal	T2A	Liver	ITGA8(10p)	CD44+CD24-	4	2	2		TNBC	TNBC4_PR	ITGA8(10p)	CD44+CD24-	2	1	2
Basal	T2A	Liver	ITGA8(10p)	CD44+CD24-	3	3	1		TNBC	TNBC4_PR	ITGA8(10p)	CD44+CD24-	2	1	2
Basal	T2A	Liver	ITGA8(10p)	CD44+CD24-	5	4	1.25		TNBC	TNBC4_PR	ITGA8(10p)	CD44+CD24-	2	1	2
Basal	T2A	Liver	ITGA8(10p)	CD44+CD24-	4	4	1		TNBC	TNBC4_PR	ITGA8(10p)	CD44+CD24-	2	2	1
Basal	T2A	Liver	ITGA8(10p)	CD44+CD24-	7	6	1.16667		TNBC	TNBC4_PR	ITGA8(10p)	CD44+CD24-	1	1	1
Basal	T2A	Liver	ITGA8(10p)	CD44+CD24-	9	6	1.5		TNBC	TNBC4_PR	ITGA8(10p)	CD44+CD24-	2	2	1
Basal	T2A	Liver	ITGA8(10p)	CD44+CD24-	3	1	3		TNBC	TNBC4_PR	ITGA8(10p)	CD44+CD24-	2	1	2
Basal	T2A	Liver	ITGA8(10p)	CD44+CD24-	5	6	0.833333		TNBC	TNBC4_PR	ITGA8(10p)	CD44+CD24-	2	2	1
Basal	T2A	Liver	ITGA8(10p)	CD44+CD24-	7	3	2.33333		TNBC	TNBC4_PR	ITGA8(10p)	CD44+CD24-	3	1	3
Basal	T2A	Liver	ITGA8(10p)	CD44+CD24-	1	2	0.5		TNBC	TNBC4_PR	ITGA8(10p)	CD44+CD24-	1	1	1
Basal	T2A	Liver	ITGA8(10p)	CD44+CD24-	3	2	1.5		TNBC	TNBC4_PR	ITGA8(10p)	CD44+CD24-	2	1	2
Basal	T2A	Liver	ITGA8(10p)	CD44+CD24-	5	3	1.66667		TNBC	TNBC4_PR	ITGA8(10p)	CD44+CD24-	1	1	1
Basal	T2A	Liver	ITGA8(10p)	CD44+CD24-	5	5	1		TNBC	TNBC4_PR	ITGA8(10p)	CD44+CD24-	4	4	1
Basal	T2A	Liver	ITGA8(10p)	CD44+CD24-	3	2	1.5		TNBC	TNBC4_PR	ITGA8(10p)	CD44+CD24-	1	1	1
Basal	T2A	Liver	ITGA8(10p)	CD44+CD24-	1	2	0.5		TNBC	TNBC4_PR	ITGA8(10p)	CD44+CD24-	3	3	1
Basal	T2A	Liver	ITGA8(10p)	CD44+CD24-	2	2	1		TNBC	TNBC4_PR	ITGA8(10p)	CD44+CD24-	4	4	1
Basal	T2A	Liver	ITGA8(10p)	CD44+CD24-	4	3	1.33333		TNBC	TNBC4_PR	ITGA8(10p)	CD44+CD24-	1	1	1
Basal	T2A	Liver	ITGA8(10p)	CD44+CD24-	2	1	2		TNBC	TNBC4_PR	ITGA8(10p)	CD44+CD24-	1	1	1
Basal	T2A	Liver	ITGA8(10p)	CD44+CD24-	2	2	1		TNBC	TNBC4_PR	ITGA8(10p)	CD44+CD24-	1	1	1
Basal	T2A	Liver	ITGA8(10p)	CD44+CD24+	4	4	1		TNBC	TNBC4_PR	ITGA8(10p)	CD44+CD24-	1	1	1
Basal	T2A	Liver	ITGA8(10p)	CD44+CD24+	6	4	1.5		TNBC	TNBC4_PR	ITGA8(10p)	CD44+CD24-	3	1	3
Basal	T2A	Liver	ITGA8(10p)	CD44+CD24+	3	3	1		TNBC	TNBC4_PR	ITGA8(10p)	CD44+CD24-	3	2	1.5
Basal	T2A	Liver	ITGA8(10p)	CD44+CD24+	5	3	1.66667		TNBC	TNBC4_PR	ITGA8(10p)	CD44+CD24-	1	1	1
Basal	T2A	Liver	ITGA8(10p)	CD44+CD24+	2	1	2		TNBC	TNBC4_PR	ITGA8(10p)	CD44+CD24-	3	3	1
Basal	T2A	Liver	ITGA8(10p)	CD44+CD24+	3	3	1		TNBC	TNBC4_PR	ITGA8(10p)	CD44+CD24-	4	2	2
Basal	T2A	Liver	ITGA8(10p)	CD44+CD24+	3	4	0.75		TNBC	TNBC4_PR	ITGA8(10p)	CD44+CD24-	2	1	2
Basal	T2A	Liver	ITGA8(10p)	CD44+CD24+	3	2	1.5		TNBC	TNBC4_PR	ITGA8(10p)	CD44+CD24-	3	1	3
Basal	T2A	Liver	ITGA8(10p)	CD44+CD24+	4	1	4		TNBC	TNBC4_PR	ITGA8(10p)	CD44+CD24-	3	2	1.5
Basal	T2A	Liver	ITGA8(10p)	CD44+CD24+	1	1	1		TNBC	TNBC4_PR	ITGA8(10p)	CD44+CD24-	2	2	1
Basal	T2A	Liver	ITGA8(10p)	CD44+CD24+	1	1	1		TNBC	TNBC4_PR	ITGA8(10p)	CD44+CD24-	1	1	1
Basal	T2A	Liver	ITGA8(10p)	CD44+CD24+	2	2	1		TNBC	TNBC4_PR	ITGA8(10p)	CD44+CD24-	2	1	2
Basal	T2A	Liver	ITGA8(10p)	CD44+CD24+	2	3	0.666667		TNBC	TNBC4_PR	ITGA8(10p)	CD44+CD24-	2	2	1
Basal	T2A	Liver	ITGA8(10p)	CD44+CD24+	1	2	0.5		TNBC	TNBC4_PR	ITGA8(10p)	CD44+CD24-	2	2	1
Basal	T2A	Liver	ITGA8(10p)	CD44+CD24+	4	2	2		TNBC	TNBC4_PR	ITGA8(10p)	CD44+CD24-	2	1	2
Basal	T2A	Liver	ITGA8(10p)	CD44+CD24+	7	3	2.33333		TNBC	TNBC4_PR	ITGA8(10p)	CD44+CD24-	1	1	1
Basal	T2A	Liver	ITGA8(10p)	CD44+CD24+	4	3	1.33333		TNBC	TNBC4_PR	ITGA8(10p)	CD44+CD24-	1	1	1
Basal	T2A	Liver	ITGA8(10p)	CD44+CD24+	7	2	3.5		TNBC	TNBC4_PR	ITGA8(10p)	CD44+CD24-	2	2	1
[truncated: 15,082 more rows]
