# Supplementary material for: Genetic and Phenotypic Diversity in Breast Tumor Metastases
Source: Oxford University Press journal article supplement (doi:10.1158/0008-5472.can-13-2357-t), 2014-01-21
Supplement: 00085472can132357t-sup-tab6.xlsx [file 00085472can132357t-sup-tab6.xlsx]

## Sheet: Sheet1
Supplementary Table 6. Shannon and Simpson's index for each cell type based on BAC, CEP, BAC/CEP and unique counts. Significant p values are highlighted in bold red and italics. NA, not avaialble.
Criteria for diversity index	Subtype	Case	Shannon index																																								Simpson's index
			300I6 (11q)		728H8 (16p)		621K8 (8q)										H2AFJ (12p)										ITGA8 (10p)										NUAK2 (1q)						300I6 (11q)		728H8 (16p)		621K8 (8q)
			CK+	p value	CK+	p value	CD44+ CD24-	p value	CD44+ CD24+	p value	CD44- CD24+	p value	CD44- CD24-	p value	CK+	p value	CD44+ CD24-	p value	CD44+ CD24+	p value	CD44- CD24+	p value	CD44- CD24-	p value	CK+	p value	CD44+ CD24-	p value	CD44+ CD24+	p value	CD44- CD24+	p value	CD44- CD24-	p value	CK+	p value	CD44+ CD24-	p value	CD44- CD24+	p value	CK+	p value	CK+	p value	CK+	p value	CD44+ CD24-	p value	CD44+ CD24+
BAC	Luminal A	LUMA1_PR	1.57841	0.00337737	NA	NA	NA	NA	NA	NA	NA	NA	NA	NA	1.92983	0.898597	NA	NA	NA	NA	NA	NA	NA	NA	NA	NA	NA	NA	NA	NA	NA	NA	NA	NA	NA	NA	NA	NA	NA	NA	NA	NA	0.7638	0.00996748	NA	NA	NA	NA	NA
		LUMA1_LN	1.86457		1.49763		NA		NA		NA		NA		1.95829		NA		NA		NA		NA		NA		NA		NA		NA		NA		NA		NA		NA		NA		0.8234		0.7396		NA		NA
		LUMA2_PR	1.2815	0.238977	1.54125	0.171671	NA	NA	NA	NA	NA	NA	NA	NA	1.82806	0.000217619	NA	NA	NA	NA	NA	NA	NA	NA	NA	NA	NA	NA	NA	NA	NA	NA	NA	NA	NA	NA	NA	NA	NA	NA	NA	NA	0.6718	0.349244	0.7566	0.372911	NA	NA	NA
		LUMA2_LN	1.43221		1.42726		NA		NA		NA		NA		1.46238		NA		NA		NA		NA		NA		NA		NA		NA		NA		NA		NA		NA		NA		0.7082		0.7348		NA		NA
		LUMA3_PR	1.25789	0.799038	0.664164	3.71126e-05	NA	NA	NA	NA	NA	NA	NA	NA	1.1435	0.0444039	NA	NA	NA	NA	NA	NA	NA	NA	NA	NA	NA	NA	NA	NA	NA	NA	NA	NA	NA	NA	NA	NA	NA	NA	NA	NA	0.5862	0.300395	0.3386	6.26833e-06	NA	NA	NA
		LUMA3_LN	1.21867		1.14014		NA		NA		NA		NA		1.33426		NA		NA		NA		NA		NA		NA		NA		NA		NA		NA		NA		NA		NA		0.6486		0.6306		NA		NA
	TNBC	TNBC1_PR	NA	NA	NA	NA	NA	NA	NA	NA	1.07546	1.05979e-06	0.977435	8.89095e-05	NA	NA	NA	NA	NA	NA	0.975857	0.715059	0.970762	0.358699	NA	NA	NA	NA	NA	NA	1.31887	0.994669	1.36115	0.0370193	NA	NA	NA	NA	NA	NA	NA	NA	NA	NA	NA	NA	NA	NA	NA
		TNBC1_LN	NA		NA		NA		NA		1.54789		1.40755		NA		NA		NA		0.929782		0.876117		NA		NA		NA		1.32518		1.16895		NA		NA		NA		NA		NA		NA		NA		NA
		TNBC2_PR	NA	NA	NA	NA	NA	NA	NA	NA	NA	NA	NA	NA	0.920045	0.000315753	NA	NA	NA	NA	NA	NA	NA	NA	1.22536	0.410831	NA	NA	NA	NA	NA	NA	NA	NA	1.20838	0.000378886	NA	NA	NA	NA	NA	NA	NA	NA	NA	NA	NA	NA	NA
		TNBC2_LN	NA		NA		NA		NA		NA		NA		1.29022		NA		NA		NA		NA		1.33953		NA		NA		NA		NA		1.60982		NA		NA		NA		NA		NA		NA		NA
		TNBC4_PR	NA	NA	NA	NA	1.31307	0.043543	NA	NA	NA	NA	NA	NA	NA	NA	1.1006	0.26491	NA	NA	NA	NA	NA	NA	NA	NA	1.46784	0.101576	NA	NA	NA	NA	NA	NA	NA	NA	NA	NA	NA	NA	NA	NA	NA	NA	NA	NA	0.6868	0.0391039	NA
		TNBC4_LN	NA		NA		1.50369		NA		NA		NA		NA		0.970762		NA		NA		NA		NA		1.58326		NA		NA		NA		NA		NA		NA		NA		NA		NA		0.7518		NA
		TNBC5_PR	NA	NA	NA	NA	NA	NA	NA	NA	NA	NA	NA	NA	1.24854	1.48203e-05	NA	NA	NA	NA	NA	NA	NA	NA	0.975409	0.000304238	NA	NA	NA	NA	NA	NA	NA	NA	1.26993	0.0128431	NA	NA	NA	NA	NA	NA	NA	NA	NA	NA	NA	NA	NA
		TNBC5_LN	NA		NA		NA		NA		NA		NA		1.75051		NA		NA		NA		NA		1.30342		NA		NA		NA		NA		1.57384		NA		NA		NA		NA		NA		NA		NA
		TNBC6_PR	NA	NA	NA	NA	1.73937	0.350246	1.87326	0.633528	2.02856	0.00873867	1.76243	0.102329	NA	NA	1.13849	0.000104208	1.24791	0.00821715	1.34343	0.109106	1.28755	0.0207274	NA	NA	1.22245	0.44826	1.19211	0.184871	1.20685	0.976789	1.16702	0.00854223	NA	NA	NA	NA	NA	NA	NA	NA	NA	NA	NA	NA	0.7944	0.182801	0.814
		TNBC6_LN	NA		NA		1.64001		1.81858		1.73424		1.60823		NA		1.51491		1.51181		1.51338		1.52431		NA		1.31021		1.33863		1.20872		1.44625		NA		NA		NA		NA		NA		NA		0.7632		0.816
		TNBC7_PR	NA	NA	NA	NA	0.984302	4.13615e-05	NA	NA	NA	NA	1.08557	0.00183089	NA	NA	1.82864	0.0896479	NA	NA	NA	NA	1.68428	0.274534	NA	NA	1.37071	0.195626	NA	NA	NA	NA	1.14855	0.935942	NA	NA	NA	NA	NA	NA	NA	NA	NA	NA	NA	NA	0.5426	0.000180898	NA
		TNBC7_LN	NA		NA		1.4998		NA		NA		1.43221		NA		1.63749		NA		NA		1.56899		NA		1.25744		NA		NA		1.13861		NA		NA		NA		NA		NA		NA		0.7274		NA
	HER2+	Her2_1_PR	NA	NA	NA	NA	NA	NA	NA	NA	1.86086	0.409177	NA	NA	NA	NA	NA	NA	NA	NA	NA	NA	NA	NA	NA	NA	NA	NA	NA	NA	NA	NA	NA	NA	NA	NA	NA	NA	1.55534	3.28781e-12	NA	NA	NA	NA	NA	NA	NA	NA	NA
		Her2_1_LN	NA		NA		NA		NA		1.78654		NA		NA		NA		NA		NA		NA		NA		NA		NA		NA		NA		NA		NA		2.10193		NA		NA		NA		NA		NA
		Her2_2_PR	NA	NA	NA	NA	NA	NA	NA	NA	NA	NA	NA	NA	2.47888	0.000447964	NA	NA	NA	NA	NA	NA	NA	NA	NA	NA	NA	NA	NA	NA	NA	NA	NA	NA	NA	NA	NA	NA	NA	NA	1.16954	0.00469417	NA	NA	NA	NA	NA	NA	NA
		Her2_2_LN	NA		NA		NA		NA		NA		NA		2.15291		NA		NA		NA		NA		NA		NA		NA		NA		NA		NA		NA		NA		0.874305		NA		NA		NA		NA
		Her2_3_PR	NA	NA	NA	NA	1.19666	0.850568	NA	NA	NA	NA	NA	NA	NA	NA	NA	NA	NA	NA	NA	NA	NA	NA	NA	NA	NA	NA	NA	NA	NA	NA	NA	NA	NA	NA	1.20087	1.59097e-11	NA	NA	NA	NA	NA	NA	NA	NA	0.6464	0.993566	NA
		Her2_3_LN	NA		NA		1.1804		NA		NA		NA		NA		NA		NA		NA		NA		NA		NA		NA		NA		NA		NA		1.80018		NA		NA		NA		NA		0.646		NA
CEP	Luminal A	LUMA1_PR	1.12929	0.000403525	NA	NA	NA	NA	NA	NA	NA	NA	NA	NA	1.32083	0.25629	NA	NA	NA	NA	NA	NA	NA	NA	NA	NA	NA	NA	NA	NA	NA	NA	NA	NA	NA	NA	NA	NA	NA	NA	NA	NA	0.6346	0.00237294	NA	NA	NA	NA	NA
		LUMA1_LN	1.46867		0.975645		NA		NA		NA		NA		1.41309		NA		NA		NA		NA		NA		NA		NA		NA		NA		NA		NA		NA		NA		0.7426		0.5802		NA		NA
		LUMA2_PR	1.0499	0.0447841	0.844116	0.00321347	NA	NA	NA	NA	NA	NA	NA	NA	1.44591	0.00118315	NA	NA	NA	NA	NA	NA	NA	NA	NA	NA	NA	NA	NA	NA	NA	NA	NA	NA	NA	NA	NA	NA	NA	NA	NA	NA	0.6022	0.113101	0.5222	0.0122899	NA	NA	NA
		LUMA2_LN	1.26942		1.13726		NA		NA		NA		NA		1.14592		NA		NA		NA		NA		NA		NA		NA		NA		NA		NA		NA		NA		NA		0.6688		0.6214		NA		NA
		LUMA3_PR	1.01037	0.188327	0.851296	1.38109e-05	NA	NA	NA	NA	NA	NA	NA	NA	0.859464	0.226201	NA	NA	NA	NA	NA	NA	NA	NA	NA	NA	NA	NA	NA	NA	NA	NA	NA	NA	NA	NA	NA	NA	NA	NA	NA	NA	0.5374	0.02153	0.4954	2.62855e-05	NA	NA	NA
		LUMA3_LN	1.13554		1.23037		NA		NA		NA		NA		0.989974		NA		NA		NA		NA		NA		NA		NA		NA		NA		NA		NA		NA		NA		0.6526		0.6814		NA		NA
	TNBC	TNBC1_PR	NA	NA	NA	NA	NA	NA	NA	NA	0.848082	0.105689	0.619101	0.311228	NA	NA	NA	NA	NA	NA	0.852522	0.00373024	0.756679	0.000522189	NA	NA	NA	NA	NA	NA	1.18702	0.421321	0.837876	0.788586	NA	NA	NA	NA	NA	NA	NA	NA	NA	NA	NA	NA	NA	NA	NA
		TNBC1_LN	NA		NA		NA		NA		0.990932		0.701683		NA		NA		NA		0.634179		0.455886		NA		NA		NA		1.12796		0.869129		NA		NA		NA		NA		NA		NA		NA		NA
		TNBC2_PR	NA	NA	NA	NA	NA	NA	NA	NA	NA	NA	NA	NA	0.798661	0.0185027	NA	NA	NA	NA	NA	NA	NA	NA	0.848386	0.000184022	NA	NA	NA	NA	NA	NA	NA	NA	0.898212	0.326897	NA	NA	NA	NA	NA	NA	NA	NA	NA	NA	NA	NA	NA
		TNBC2_LN	NA		NA		NA		NA		NA		NA		1.008		NA		NA		NA		NA		1.31916		NA		NA		NA		NA		0.984658		NA		NA		NA		NA		NA		NA		NA
		TNBC4_PR	NA	NA	NA	NA	1.15866	0.0393715	NA	NA	NA	NA	NA	NA	NA	NA	0.767289	0.947511	NA	NA	NA	NA	NA	NA	NA	NA	1.10759	0.640874	NA	NA	NA	NA	NA	NA	NA	NA	NA	NA	NA	NA	NA	NA	NA	NA	NA	NA	0.639	0.00710467	NA
		TNBC4_LN	NA		NA		1.32293		NA		NA		NA		NA		0.765469		NA		NA		NA		NA		1.13998		NA		NA		NA		NA		NA		NA		NA		NA		NA		0.7214		NA
		TNBC5_PR	NA	NA	NA	NA	NA	NA	NA	NA	NA	NA	NA	NA	1.42612	0.0333413	NA	NA	NA	NA	NA	NA	NA	NA	1.01711	0.000858179	NA	NA	NA	NA	NA	NA	NA	NA	1.32937	0.0744083	NA	NA	NA	NA	NA	NA	NA	NA	NA	NA	NA	NA	NA
		TNBC5_LN	NA		NA		NA		NA		NA		NA		1.66063		NA		NA		NA		NA		1.33526		NA		NA		NA		NA		1.50858		NA		NA		NA		NA		NA		NA		NA
		TNBC6_PR	NA	NA	NA	NA	1.37563	0.87784	1.45004	0.30156	1.30976	0.50299	1.19352	0.0257232	NA	NA	1.18167	0.0949645	1.11492	0.193937	1.29656	0.6132	1.2962	0.317421	NA	NA	1.22941	0.430441	1.40969	0.922566	1.16638	0.0693629	1.14946	0.00539866	NA	NA	NA	NA	NA	NA	NA	NA	NA	NA	NA	NA	0.699	0.881999	0.7142
		TNBC6_LN	NA		NA		1.38253		1.32572		1.386		1.45632		NA		1.33678		1.2649		1.334		1.38656		NA		1.31707		1.37884		1.35853		1.43971		NA		NA		NA		NA		NA		NA		0.7016		0.6778
		TNBC7_PR	NA	NA	NA	NA	0.834872	0.0533242	NA	NA	NA	NA	0.826509	0.0309738	NA	NA	1.69506	0.266439	NA	NA	NA	NA	1.56007	0.995489	NA	NA	1.15435	0.00156313	NA	NA	NA	NA	0.992368	0.0807325	NA	NA	NA	NA	NA	NA	NA	NA	NA	NA	NA	NA	0.5182	0.0289415	NA
		TNBC7_LN	NA		NA		0.654553		NA		NA		0.647447		NA		1.56346		NA		NA		1.56169		NA		0.898742		NA		NA		0.823497		NA		NA		NA		NA		NA		NA		0.4042		NA
	HER2+	Her2_1_PR	NA	NA	NA	NA	NA	NA	NA	NA	1.17953	0.00460324	NA	NA	NA	NA	NA	NA	NA	NA	NA	NA	NA	NA	NA	NA	NA	NA	NA	NA	NA	NA	NA	NA	NA	NA	NA	NA	1.49085	0.0142028	NA	NA	NA	NA	NA	NA	NA	NA	NA
		Her2_1_LN	NA		NA		NA		NA		0.924207		NA		NA		NA		NA		NA		NA		NA		NA		NA		NA		NA		NA		NA		1.68941		NA		NA		NA		NA		NA
		Her2_2_PR	NA	NA	NA	NA	NA	NA	NA	NA	NA	NA	NA	NA	0.830425	0.924317	NA	NA	NA	NA	NA	NA	NA	NA	NA	NA	NA	NA	NA	NA	NA	NA	NA	NA	NA	NA	NA	NA	NA	NA	1.02322	0.0142028	NA	NA	NA	NA	NA	NA	NA
		Her2_2_LN	NA		NA		NA		NA		NA		NA		0.826139		NA		NA		NA		NA		NA		NA		NA		NA		NA		NA		NA		NA		0.934891		NA		NA		NA		NA
		Her2_3_PR	NA	NA	NA	NA	1.36095	0.0401289	NA	NA	NA	NA	NA	NA	NA	NA	NA	NA	NA	NA	NA	NA	NA	NA	NA	NA	NA	NA	NA	NA	NA	NA	NA	NA	NA	NA	1.28209	0.00244343	NA	NA	NA	NA	NA	NA	NA	NA	0.7	0.131379	NA
		Her2_3_LN	NA		NA		1.14873		NA		NA		NA		NA		NA		NA		NA		NA		NA		NA		NA		NA		NA		NA		0.966758		NA		NA		NA		NA		0.6478		NA
ratio	Luminal A	LUMA1_PR	1.85298	0.386587	NA	NA	NA	NA	NA	NA	NA	NA	NA	NA	2.50324	0.398431	NA	NA	NA	NA	NA	NA	NA	NA	NA	NA	NA	NA	NA	NA	NA	NA	NA	NA	NA	NA	NA	NA	NA	NA	NA	NA	0.7666	0.790751	NA	NA	NA	NA	NA
		LUMA1_LN	1.96593		2.14223		NA		NA		NA		NA		2.37658		NA		NA		NA		NA		NA		NA		NA		NA		NA		NA		NA		NA		NA		0.7716		0.8664		NA		NA
		LUMA2_PR	1.51451	0.43155	1.8268	0.219899	NA	NA	NA	NA	NA	NA	NA	NA	2.07576	7.12268e-05	NA	NA	NA	NA	NA	NA	NA	NA	NA	NA	NA	NA	NA	NA	NA	NA	NA	NA	NA	NA	NA	NA	NA	NA	NA	NA	0.6596	0.205448	0.7888	0.148136	NA	NA	NA
		LUMA2_LN	1.38202		1.64209		NA		NA		NA		NA		1.34176		NA		NA		NA		NA		NA		NA		NA		NA		NA		NA		NA		NA		NA		0.559		0.7292		NA		NA
		LUMA3_PR	1.72103	0.0411387	1.15051	9.77108e-09	NA	NA	NA	NA	NA	NA	NA	NA	1.54599	0.000434898	NA	NA	NA	NA	NA	NA	NA	NA	NA	NA	NA	NA	NA	NA	NA	NA	NA	NA	NA	NA	NA	NA	NA	NA	NA	NA	0.728	0.141936	0.6	5.16297e-06	NA	NA	NA
		LUMA3_LN	1.35974		1.86892		NA		NA		NA		NA		1.97178		NA		NA		NA		NA		NA		NA		NA		NA		NA		NA		NA		NA		NA		0.6396		0.8018		NA		NA
	TNBC	TNBC1_PR	NA	NA	NA	NA	NA	NA	NA	NA	1.20384	0.00628516	1.0542	0.000239613	NA	NA	NA	NA	NA	NA	0.995239	0.0487296	0.854053	0.57391	NA	NA	NA	NA	NA	NA	1.44977	0.329231	1.35268	0.847282	NA	NA	NA	NA	NA	NA	NA	NA	NA	NA	NA	NA	NA	NA	NA
		TNBC1_LN	NA		NA		NA		NA		1.63073		1.62778		NA		NA		NA		0.68024		0.756768		NA		NA		NA		1.27137		1.33699		NA		NA		NA		NA		NA		NA		NA		NA
		TNBC2_PR	NA	NA	NA	NA	NA	NA	NA	NA	NA	NA	NA	NA	0.65441	0.0139619	NA	NA	NA	NA	NA	NA	NA	NA	1.1825	0.683784	NA	NA	NA	NA	NA	NA	NA	NA	1.05421	0.00124932	NA	NA	NA	NA	NA	NA	NA	NA	NA	NA	NA	NA	NA
		TNBC2_LN	NA		NA		NA		NA		NA		NA		1.04814		NA		NA		NA		NA		1.28949		NA		NA		NA		NA		1.60022		NA		NA		NA		NA		NA		NA		NA
		TNBC4_PR	NA	NA	NA	NA	1.50579	0.88652	NA	NA	NA	NA	NA	NA	NA	NA	0.947393	0.469061	NA	NA	NA	NA	NA	NA	NA	NA	1.45522	0.00216394	NA	NA	NA	NA	NA	NA	NA	NA	NA	NA	NA	NA	NA	NA	NA	NA	NA	NA	0.6242	0.893253	NA
		TNBC4_LN	NA		NA		1.53726		NA		NA		NA		NA		0.857682		NA		NA		NA		NA		1.86694		NA		NA		NA		NA		NA		NA		NA		NA		NA		0.6172		NA
		TNBC5_PR	NA	NA	NA	NA	NA	NA	NA	NA	NA	NA	NA	NA	1.81132	0.00028819	NA	NA	NA	NA	NA	NA	NA	NA	0.656424	0.0414874	NA	NA	NA	NA	NA	NA	NA	NA	1.88064	0.405961	NA	NA	NA	NA	NA	NA	NA	NA	NA	NA	NA	NA	NA
		TNBC5_LN	NA		NA		NA		NA		NA		NA		2.41863		NA		NA		NA		NA		1.04356		NA		NA		NA		NA		1.75258		NA		NA		NA		NA		NA		NA		NA
		TNBC6_PR	NA	NA	NA	NA	2.50187	0.0460057	2.44044	0.416123	2.62712	0.514546	2.21138	0.277112	NA	NA	1.81461	0.000388612	1.73529	0.591915	2.02624	0.0828751	1.78301	0.000399639	NA	NA	1.74056	0.411234	1.7818	0.154357	1.35023	0.000203128	1.77834	0.710391	NA	NA	NA	NA	NA	NA	NA	NA	NA	NA	NA	NA	0.9058	0.0266035	0.8844
		TNBC6_LN	NA		NA		2.26425		2.56725		2.53291		2.34857		NA		2.24196		1.82914		2.26351		2.33577		NA		1.88529		1.99483		1.99765		1.857		NA		NA		NA		NA		NA		NA		0.8582		0.8956
		TNBC7_PR	NA	NA	NA	NA	1.32722	0.0601693	NA	NA	NA	NA	1.35472	0.360939	NA	NA	1.87798	0.574549	NA	NA	NA	NA	1.90647	0.89115	NA	NA	1.49785	0.387167	NA	NA	NA	NA	1.20422	0.994417	NA	NA	NA	NA	NA	NA	NA	NA	NA	NA	NA	NA	0.665	0.233624	NA
		TNBC7_LN	NA		NA		1.62264		NA		NA		1.49886		NA		1.98023		NA		NA		1.88283		NA		1.36774		NA		NA		1.19975		NA		NA		NA		NA		NA		NA		0.7176		NA
	HER2+	Her2_1_PR	NA	NA	NA	NA	NA	NA	NA	NA	2.18511	0.147904	NA	NA	NA	NA	NA	NA	NA	NA	NA	NA	NA	NA	NA	NA	NA	NA	NA	NA	NA	NA	NA	NA	NA	NA	NA	NA	1.57481	0	NA	NA	NA	NA	NA	NA	NA	NA	NA
		Her2_1_LN	NA		NA		NA		NA		2.00183		NA		NA		NA		NA		NA		NA		NA		NA		NA		NA		NA		NA		NA		3.018		NA		NA		NA		NA		NA
		Her2_2_PR	NA	NA	NA	NA	NA	NA	NA	NA	NA	NA	NA	NA	2.72443	0.0772312	NA	NA	NA	NA	NA	NA	NA	NA	NA	NA	NA	NA	NA	NA	NA	NA	NA	NA	NA	NA	NA	NA	NA	NA	1.31369	0.321977	NA	NA	NA	NA	NA	NA	NA
		Her2_2_LN	NA		NA		NA		NA		NA		NA		2.50363		NA		NA		NA		NA		NA		NA		NA		NA		NA		NA		NA		NA		1.13853		NA		NA		NA		NA
		Her2_3_PR	NA	NA	NA	NA	2.08744	0.000217093	NA	NA	NA	NA	NA	NA	NA	NA	NA	NA	NA	NA	NA	NA	NA	NA	NA	NA	NA	NA	NA	NA	NA	NA	NA	NA	NA	NA	1.6205	9.42614e-05	NA	NA	NA	NA	NA	NA	NA	NA	0.8434	0.000330019	NA
		Her2_3_LN	NA		NA		1.53863		NA		NA		NA		NA		NA		NA		NA		NA		NA		NA		NA		NA		NA		NA		2.23507		NA		NA		NA		NA		0.6732		NA
unique	Luminal A	LUMA1_PR	2.49996	0.00325485	NA	NA	NA	NA	NA	NA	NA	NA	NA	NA	2.98095	0.765641	NA	NA	NA	NA	NA	NA	NA	NA	NA	NA	NA	NA	NA	NA	NA	NA	NA	NA	NA	NA	NA	NA	NA	NA	NA	NA	0.8936	0.0207659	NA	NA	NA	NA	NA
		LUMA1_LN	2.88514		2.36346		NA		NA		NA		NA		3.01416		NA		NA		NA		NA		NA		NA		NA		NA		NA		NA		NA		NA		NA		0.93		0.881		NA		NA
		LUMA2_PR	2.16536	0.914661	2.23089	0.768271	NA	NA	NA	NA	NA	NA	NA	NA	2.84875	7.34053e-06	NA	NA	NA	NA	NA	NA	NA	NA	NA	NA	NA	NA	NA	NA	NA	NA	NA	NA	NA	NA	NA	NA	NA	NA	NA	NA	0.8344	0.770306	0.867	0.930368	NA	NA	NA
		LUMA2_LN	2.21537		2.26445		NA		NA		NA		NA		2.17611		NA		NA		NA		NA		NA		NA		NA		NA		NA		NA		NA		NA		NA		0.826		0.8636		NA		NA
		LUMA3_PR	2.07768	0.97201	1.40929	7.04636e-10	NA	NA	NA	NA	NA	NA	NA	NA	1.87374	0.0056775	NA	NA	NA	NA	NA	NA	NA	NA	NA	NA	NA	NA	NA	NA	NA	NA	NA	NA	NA	NA	NA	NA	NA	NA	NA	NA	0.7684	0.096912	0.6576	2.06115e-08	NA	NA	NA
		LUMA3_LN	2.0371		2.28614		NA		NA		NA		NA		2.23815		NA		NA		NA		NA		NA		NA		NA		NA		NA		NA		NA		NA		NA		0.8356		0.8742		NA		NA
	TNBC	TNBC1_PR	NA	NA	NA	NA	NA	NA	NA	NA	1.72182	2.61064e-05	1.48038	4.39727e-05	NA	NA	NA	NA	NA	NA	1.57536	0.0101529	1.45861	0.0427382	NA	NA	NA	NA	NA	NA	2.15828	0.4002	1.87084	0.700274	NA	NA	NA	NA	NA	NA	NA	NA	NA	NA	NA	NA	NA	NA	NA
		TNBC1_LN	NA		NA		NA		NA		2.28292		2.04233		NA		NA		NA		1.21731		1.14191		NA		NA		NA		2.05328		1.82893		NA		NA		NA		NA		NA		NA		NA		NA
		TNBC2_PR	NA	NA	NA	NA	NA	NA	NA	NA	NA	NA	NA	NA	1.24573	0.000139959	NA	NA	NA	NA	NA	NA	NA	NA	1.69425	0.0188868	NA	NA	NA	NA	NA	NA	NA	NA	1.72605	0.000127743	NA	NA	NA	NA	NA	NA	NA	NA	NA	NA	NA	NA	NA
		TNBC2_LN	NA		NA		NA		NA		NA		NA		1.77484		NA		NA		NA		NA		2.14305		NA		NA		NA		NA		2.2586		NA		NA		NA		NA		NA		NA		NA
		TNBC4_PR	NA	NA	NA	NA	2.14879	0.0523791	NA	NA	NA	NA	NA	NA	NA	NA	1.52469	0.307296	NA	NA	NA	NA	NA	NA	NA	NA	2.23866	0.108023	NA	NA	NA	NA	NA	NA	NA	NA	NA	NA	NA	NA	NA	NA	NA	NA	NA	NA	0.829	0.0631572	NA
		TNBC4_LN	NA		NA		2.43167		NA		NA		NA		NA		1.39914		NA		NA		NA		NA		2.40156		NA		NA		NA		NA		NA		NA		NA		NA		NA		0.8812		NA
		TNBC5_PR	NA	NA	NA	NA	NA	NA	NA	NA	NA	NA	NA	NA	2.43542	0.000578538	NA	NA	NA	NA	NA	NA	NA	NA	1.47528	0.00111815	NA	NA	NA	NA	NA	NA	NA	NA	2.40865	0.370361	NA	NA	NA	NA	NA	NA	NA	NA	NA	NA	NA	NA	NA
		TNBC5_LN	NA		NA		NA		NA		NA		NA		2.9691		NA		NA		NA		NA		1.98931		NA		NA		NA		NA		2.57147		NA		NA		NA		NA		NA		NA		NA
		TNBC6_PR	NA	NA	NA	NA	2.86544	0.311103	2.9722	0.576847	3.0639	0.197885	2.69789	0.257739	NA	NA	2.04238	4.40991e-07	2.06536	0.00209761	2.34841	0.00971034	2.27127	0.00112074	NA	NA	2.1329	0.0166561	2.302	0.0387768	1.95265	0.00169985	2.19173	0.00306816	NA	NA	NA	NA	NA	NA	NA	NA	NA	NA	NA	NA	0.9312	0.162253	0.9324
		TNBC6_LN	NA		NA		2.7455		2.88473		2.87989		2.83599		NA		2.70128		2.53731		2.69453		2.75095		NA		2.45661		2.56758		2.39252		2.61298		NA		NA		NA		NA		NA		NA		0.9114		0.929
		TNBC7_PR	NA	NA	NA	NA	1.68924	0.0871197	NA	NA	NA	NA	1.7854	0.314591	NA	NA	2.81106	0.723942	NA	NA	NA	NA	2.80458	0.363294	NA	NA	2.27615	0.00595676	NA	NA	NA	NA	1.84335	0.692031	NA	NA	NA	NA	NA	NA	NA	NA	NA	NA	NA	NA	0.7642	0.238813	NA
		TNBC7_LN	NA		NA		1.95176		NA		NA		1.91882		NA		2.75263		NA		NA		2.67541		NA		1.91354		NA		NA		1.79164		NA		NA		NA		NA		NA		NA		0.8044		NA
	HER2+	Her2_1_PR	NA	NA	NA	NA	NA	NA	NA	NA	2.76308	0.00404963	NA	NA	NA	NA	NA	NA	NA	NA	NA	NA	NA	NA	NA	NA	NA	NA	NA	NA	NA	NA	NA	NA	NA	NA	NA	NA	2.58684	1.77649e-11	NA	NA	NA	NA	NA	NA	NA	NA	NA
		Her2_1_LN	NA		NA		NA		NA		2.4007		NA		NA		NA		NA		NA		NA		NA		NA		NA		NA		NA		NA		NA		3.45182		NA		NA		NA		NA		NA
		Her2_2_PR	NA	NA	NA	NA	NA	NA	NA	NA	NA	NA	NA	NA	3.13831	0.0244285	NA	NA	NA	NA	NA	NA	NA	NA	NA	NA	NA	NA	NA	NA	NA	NA	NA	NA	NA	NA	NA	NA	NA	NA	1.9196	0.0335631	NA	NA	NA	NA	NA	NA	NA
		Her2_2_LN	NA		NA		NA		NA		NA		NA		2.83555		NA		NA		NA		NA		NA		NA		NA		NA		NA		NA		NA		NA		1.60086		NA		NA		NA		NA
		Her2_3_PR	NA	NA	NA	NA	2.43279	0.109599	NA	NA	NA	NA	NA	NA	NA	NA	NA	NA	NA	NA	NA	NA	NA	NA	NA	NA	NA	NA	NA	NA	NA	NA	NA	NA	NA	NA	2.2511	0.018126	NA	NA	NA	NA	NA	NA	NA	NA	0.8786	0.2182	NA
		Her2_3_LN	NA		NA		2.17012		NA		NA		NA		NA		NA		NA		NA		NA		NA		NA		NA		NA		NA		NA		2.5906		NA		NA		NA		NA		0.8488		NA
[truncated: 33 more columns]
